# Supplementary material for: Acylative Suzuki coupling of amides: acyl-nitrogen activation via synergy of independently modifiable activating groups
Source: Royal Society of Chemistry journal article supplement (doi:10.1039/c5cc00430f), 2015-01-01

## Supporting Information

for

# Acylative Suzuki coupling of amides: Acyl-nitrogen activation via synergy of independently modifiable activating groups

Xijing Li and Gang Zou\*

## Contents

|                                                                                                          |           |
|----------------------------------------------------------------------------------------------------------|-----------|
| <b>1. General experimental methods</b>                                                                   | <b>2</b>  |
| <b>2. General procedure for the synthesis of carboxylic amides</b>                                       | <b>2</b>  |
| <b>3. Typical procedure for acylative Suzuki coupling reaction</b>                                       | <b>3</b>  |
| <b>4. Synthesis of 4</b>                                                                                 | <b>4</b>  |
| <b>5. Synthesis of 4'-methoxybiphenyl-4-yl(p-tolyl)methanone 5 via sequential reactions in one flask</b> | <b>4</b>  |
| <b>6. Synthesis of 4'-methylbiphenyl-4-yl(p-tolyl)methanone 6 via one-pot reaction</b>                   | <b>4</b>  |
| <b>7. Characterization data of compounds</b>                                                             | <b>5</b>  |
| <b>8. References</b>                                                                                     | <b>15</b> |
| <b>9. <sup>1</sup>H and <sup>13</sup>CNMR spectra of amides and ketones</b>                              | <b>17</b> |
| <b>10. HRMS spectra of new compounds</b>                                                                 | <b>77</b> |

## 1. General experimental methods

All reactions were carried out under argon by using standard Schlenk techniques unless otherwise stated. Commercially available chemicals were used as received. Dioxane was dried with sodium/benzophenone and distilled. Pd(PCy<sub>3</sub>)<sub>2</sub>Cl<sub>2</sub><sup>1</sup>, **1a**<sup>2</sup>, **1b**<sup>3</sup> and **1c**<sup>4</sup> were prepared according to previously reported procedures. Column chromatography was performed on 200-300 mesh silica gel. <sup>1</sup>H and <sup>13</sup>C NMR spectra were recorded in CDCl<sub>3</sub> or DMSO-d<sub>6</sub> at ambient temperature. Chemical shifts in NMR are reported in ppm (δ), relative to the internal standard of tetramethylsilane (TMS). The signals observed are described as s (singlet), d (doublet), t (triplet), q (quartet), dd (double doublet), m (multiplets). The number of protons (n) for a given resonance is indicated as nH. Coupling constants are reported as J in Hz. All new compounds were further characterized by HRMS.

## 2. General procedure for the synthesis of carboxylic amides

### General procedure A:

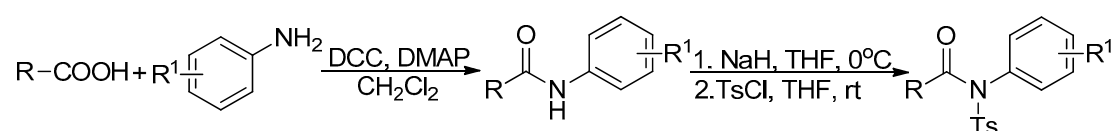

To a mixture of carboxylic acid (10 mmol) in CH<sub>2</sub>Cl<sub>2</sub> (20 ml) were added DCC (11mmol), DMAP (0.2 mmol) and amine (10mmol) at 0°C. The reaction mixture was stirred at room temperature for 5h and washed with brine. The organic layer was dried over Na<sub>2</sub>SO<sub>4</sub>, filtered and evaporated under reduced pressure to give crude product, which was purified by column chromatography on silica gel to afford N-phenylbenzamide.

To a mixture of NaH (60% dispersion in mineral oil, 6.5 mmol) in dry THF (10 ml) was added a solution of N-phenylbenzamide (10 mmol) in THF (5 ml) at 0°C. The reaction mixture was stirred at 0 °C for 1 h. To this mixture was added a solution of TsCl (6.5 mmol) in dry THF (10 ml) via cannula. The reaction mixture was stirred at room temperature for 5h and quenched with sat.NH<sub>4</sub>Cl (aq., 30 ml). The aqueous phase was extracted with CH<sub>2</sub>Cl<sub>2</sub>, dried over Na<sub>2</sub>SO<sub>4</sub>, filtered and evaporated under reduced pressure to give crude product, which was purified by column chromatography on silica gel to afford N-tosylcarboxylic amide.

### General procedure B:

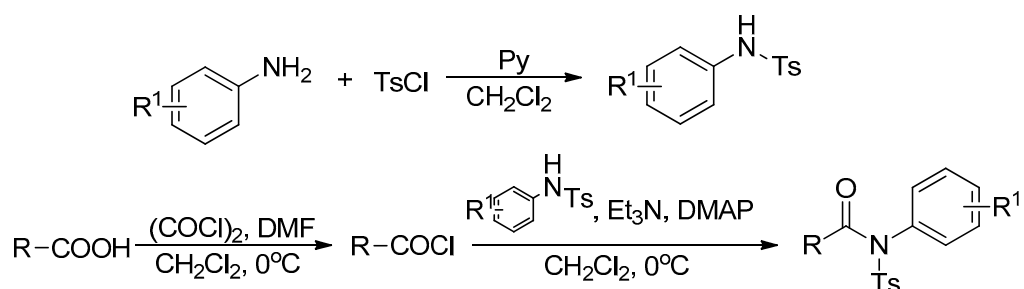

To a mixture of amine (10 mmol) and pyridine (2 ml, 25 mmol) in CH<sub>2</sub>Cl<sub>2</sub> (10 ml) was added slowly TsCl (2.3 g, 12 mmol) in CH<sub>2</sub>Cl<sub>2</sub> (10 ml) at 0°C. The reaction mixture was stirred at room temperature for 1h. The reaction mixture was washed with 5% HCl, brine and H<sub>2</sub>O. The organic layer was dried over Na<sub>2</sub>SO<sub>4</sub>, filtered and evaporated under reduced pressure to give crude product, which was purified by column chromatography on silica gel to afford the sulfonamide.

To a solution of carboxylic acid (5 mmol) in CH<sub>2</sub>Cl<sub>2</sub> (10 ml) were added oxalyl chloride (0.5 ml, 6 mmol, 1.2 equiv) and DMF (two drops) at 0°C. The mixture was stirred until gas evolution stopped. Then it was concentrated under reduced pressure, washed with dichloromethane and concentrated again. The crude acyl chloride was used directly in the next step.

To a mixture of the corresponding sulfonamide (5 mmol), DMAP (0.5 mmol%) and Et<sub>3</sub>N (1.5 ml, 10 mmol) in CH<sub>2</sub>Cl<sub>2</sub> (10 ml) was added slowly the acyl chloride made above in CH<sub>2</sub>Cl<sub>2</sub> (10 ml) at 0°C. The reaction mixture was stirred at room temperature for 2h. Then the reaction mixture was washed with 5% HCl, brine and H<sub>2</sub>O. The organic layer was dried over Na<sub>2</sub>SO<sub>4</sub>, filtered and evaporated under reduced pressure to give crude product, which was purified by column chromatography on silica gel to afford N-tosylcarboxylic amide.

### 3. Typical procedure for acylative Suzuki coupling reaction

Under a N<sub>2</sub> atmosphere, to a 10 ml dry flask were added amide **1** (0.5 mmol), boronic acid **2** (0.75 mmol), Pd(PCy<sub>3</sub>)<sub>2</sub>Cl<sub>2</sub> (5 mmol%), PCy<sub>3</sub> (3 mmol%), K<sub>2</sub>CO<sub>3</sub> (1 mmol), and dry dioxane (4 ml). The mixture was stirred at 110°C for a given time or monitored by TLC until the starting material was completely consumed. The reaction mixture was diluted with CH<sub>2</sub>Cl<sub>2</sub> (15 ml), followed by washing with H<sub>2</sub>O (2×10 ml). The organic layer was dried over Na<sub>2</sub>SO<sub>4</sub>, filtered, and evaporated under reduced pressure to give crude product, which was purified by column chromatography on silica gel to afford product **3**.

#### 4. Synthesis of **4**

Under a N<sub>2</sub> atmosphere, to a 10 ml dry flask were added amide **1w** or **1x** (0.5 mmol), boronic acid **2c** (0.55 mmol), Pd(PCy<sub>3</sub>)<sub>2</sub>Cl<sub>2</sub> (5 mmol%), PCy<sub>3</sub> (3 mmol%), K<sub>2</sub>CO<sub>3</sub> (1.5 mmol), and dry dioxane (4 ml). The mixture was stirred at 110°C for a given time. The reaction mixture was diluted with CH<sub>2</sub>Cl<sub>2</sub> (15 ml), followed by washing with H<sub>2</sub>O (2×10 ml). The organic layer was dried over Na<sub>2</sub>SO<sub>4</sub>, filtered, and evaporated under reduced pressure to give crude product, which was purified by column chromatography on silica gel to afford product **4**.

#### 5. Synthesis of 4'-methoxybiphenyl-4-yl(p-tolyl)methanone **5** via sequential reactions in one flask

Under a N<sub>2</sub> atmosphere, to a 10 ml dry flask were added amide **1x** (0.5 mmol), boronic acid **2c** (0.55 mmol), Pd(PCy<sub>3</sub>)<sub>2</sub>Cl<sub>2</sub> (5 mmol%), PCy<sub>3</sub> (3 mmol%), K<sub>2</sub>CO<sub>3</sub> (1.5 mmol), and dry dioxane (4 ml). The mixture was stirred at 110°C for 8h. Then boronic acid **2b** (0.75 mmol) was added, the mixture was stirred at 110°C for 12h. The reaction mixture was diluted with CH<sub>2</sub>Cl<sub>2</sub> (15 ml), followed by washing with H<sub>2</sub>O (2×10 ml). The organic layer was dried over Na<sub>2</sub>SO<sub>4</sub>, filtered, and evaporated under reduced pressure to give crude product, which was purified by column chromatography on silica gel to afford product **5**.

#### 6. Synthesis of 4'-methylbiphenyl-4-yl(p-tolyl)methanone **6** via one-pot reaction

Under a N<sub>2</sub> atmosphere, to a 10 ml dry flask were added amide **1w** or **1x** (0.5 mmol), boronic acid **2b** (1.5 mmol), Pd(PCy<sub>3</sub>)<sub>2</sub>Cl<sub>2</sub> (5 mmol%), PCy<sub>3</sub> (3 mmol%), K<sub>2</sub>CO<sub>3</sub> (1.5 mmol), and dry dioxane (4 ml). The mixture was stirred at 110°C for 12h. The reaction mixture was diluted with CH<sub>2</sub>Cl<sub>2</sub> (15 ml), followed by washing with H<sub>2</sub>O (2×10 ml). The organic layer was dried over Na<sub>2</sub>SO<sub>4</sub>, filtered, and evaporated under reduced pressure to give crude product, which was purified by column chromatography on silica gel to afford product **6**.

## 7. Characterization data of compounds

### 1-benzoylpyrrolidine-2,5-dione **1a**<sup>2</sup>

White solid (92%), mp 129-130°C, <sup>1</sup>H NMR (CDCl<sub>3</sub>, 400 MHz) δ(ppm):7.85(d, J=7.2Hz, 2H), 7.67(t, J=7.2Hz, 1H), 7.50 (t, J=7.6Hz, 2H), 2.92(s, 4H); <sup>13</sup>C NMR (CDCl<sub>3</sub>, 100 MHz) δ(ppm):174.9, 167.9, 135.2, 131.4, 130.5, 129.0, 29.1.

### tert-butyl benzoyl(phenyl)carbamate **1b**<sup>3</sup>

White solid (85%), mp 98-99°C, <sup>1</sup>H NMR (CDCl<sub>3</sub>, 400 MHz) δ(ppm):7.73(d, J=7.2Hz, 2H), 7.52(t, J=7.2Hz, 1H), 7.46-7.41 (m, 4H), 7.34(t, J=7.6Hz, 1H), 7.27(d, J=8.0Hz, 2H), 1.22(s, 9H); <sup>13</sup>C NMR (CDCl<sub>3</sub>, 100 MHz) δ(ppm):172.8, 153.3, 139.1, 137.0, 131.8, 129.2, 128.3, 128.2, 128.0, 127.8, 83.5, 27.5.

### N-methyl-N-tosylbenzamide **1c**<sup>4</sup>

White solid (90%), mp 62-63°C, <sup>1</sup>H NMR (CDCl<sub>3</sub>, 400 MHz) δ(ppm):7.86(d, J=8.0Hz, 2H), 7.58-7.52(m, 3H), 7.43 (t, J=8.0Hz, 2H), 7.36(d, J=8.0Hz, 2H), 3.30(s, 3H), 2.47(s, 3H); <sup>13</sup>C NMR (CDCl<sub>3</sub>, 100 MHz) δ(ppm):171.5, 145.0, 135.2, 134.5, 132.0, 129.7, 128.5, 128.4, 128.3, 35.7, 21.7.

### N-phenyl-N-tosylbenzamide **1d**<sup>5</sup>

Following the general procedure A. White solid (88%), mp 153-154°C, <sup>1</sup>H NMR (CDCl<sub>3</sub>, 400 MHz) δ(ppm):7.83(d, J=8.0Hz, 2H), 7.44(d, J=8.0Hz, 2H), 7.33-7.26(m, 6H), 7.18-7.14(m, 4H), 2.45(s, 3H); <sup>13</sup>C NMR (CDCl<sub>3</sub>, 100 MHz) δ(ppm):169.9, 144.9, 137.4, 135.2, 133.7, 131.8, 130.4, 129.5, 129.3, 129.2, 129.1, 128.0, 21.7.

### 4-fluoro-N-phenyl-N-tosylbenzamide **1e**

Following the general procedure A. White solid (83%), mp 137-138°C, <sup>1</sup>H NMR (CDCl<sub>3</sub>, 400 MHz) δ(ppm):7.81(d, J=8.4Hz, 2H), 7.50-7.46(m, 2H), 7.32-7.26(m, 5H), 7.16-7.13(m, 2H), 6.85(t, J=8.4Hz, 2H), 2.45(s, 3H); <sup>13</sup>C NMR (CDCl<sub>3</sub>, 100 MHz) δ(ppm):168.8, 164.5(d, J=252.6Hz), 144.9, 137.4, 135.1, 132.1(d, J=9.3Hz), 130.3, 129.7(d, J=3.0Hz), 129.5, 129.28, 129.27, 129.2, 115.3(d, J=21.9Hz), 21.7. HRMS (ESI) m/z (M<sup>+</sup>) calcd for C<sub>20</sub>H<sub>16</sub>NO<sub>3</sub>SF 370.0835, found 370.1138.

### N-phenyl-N-tosyl-4-(trifluoromethyl)benzamide **1f**

Following the general procedure B. White solid (80%), mp 147-149°C, <sup>1</sup>H NMR (CDCl<sub>3</sub>, 400 MHz) δ(ppm):7.84(d, J=8.4Hz, 2H), 7.53(d, J=8.0Hz, 2H), 7.43(d, J=8.4Hz, 2H), 7.35-7.27(m, 5H), 7.16-7.13(m, 2H), 2.46(s, 3H); <sup>13</sup>C NMR (CDCl<sub>3</sub>, 100 MHz) δ(ppm):168.5, 145.2, 137.2, 136.8, 134.9, 133.0(q, J=32.6Hz), 130.4, 129.6, 129.5, 129.4, 125.1(q, J=3.6Hz), 123.4(q, J=279.6Hz), 21.7. HRMS (ESI) m/z (M<sup>+</sup>) calcd for C<sub>21</sub>H<sub>17</sub>NO<sub>3</sub>SF<sub>3</sub> 420.0881, found 420.0883.

#### **methyl 4-(phenyl(tosyl)carbamoyl)benzoate 1g**

Following the general procedure B. White solid (76%), mp 175-176°C, <sup>1</sup>H NMR (CDCl<sub>3</sub>, 400 MHz) δ(ppm):7.85-7.81(m, 4H), 7.46(d, J=8.4Hz, 2H), 7.33(d, J=8.0Hz, 2H), 7.29-7.27(m, 3H), 7.15-7.13(m, 2H), 3.84(s, 3H), 2.46(s, 3H); <sup>13</sup>C NMR (CDCl<sub>3</sub>, 100 MHz) δ(ppm):169.0, 165.9, 145.2, 137.8, 136.9, 135.0, 132.5, 130.4, 129.5, 129.39, 129.37, 129.3, 129.17, 129.16, 52.4, 21.8. HRMS (ESI) m/z (M<sup>+</sup>) calcd for C<sub>22</sub>H<sub>20</sub>NO<sub>5</sub>S 410.1062, found 410.1059.

#### **4-cyano-N-phenyl-N-tosylbenzamide 1h**

Following the general procedure B. White solid (85%), mp 171-172°C, <sup>1</sup>H NMR (CDCl<sub>3</sub>, 400 MHz) δ(ppm):7.83(d, J=8.4Hz, 2H), 7.48(q, J=8.8Hz, 4H), 7.35-7.28(m, 5H), 7.14-7.11(m, 2H), 2.46(s, 3H); <sup>13</sup>C NMR (CDCl<sub>3</sub>, 100 MHz) δ(ppm):168.1, 145.4, 137.9, 136.6, 134.7, 131.8, 130.4, 129.7, 129.6, 129.52, 129.49, 129.45, 117.6, 115.0, 21.8. HRMS (ESI) m/z (M<sup>+</sup>) calcd for C<sub>21</sub>H<sub>17</sub>N<sub>2</sub>O<sub>3</sub>S 377.0960, found 377.0977.

#### **4-nitro-N-phenyl-N-tosylbenzamide 1i**

Following the general procedure A. Light yellow solid (57%), mp 191-192°C, <sup>1</sup>H NMR (CDCl<sub>3</sub>, 400 MHz) δ(ppm):8.02(d, J=8.8Hz, 2H), 7.85(d, J=8.4Hz, 2H), 7.56 (d, J=8.8Hz, 2H), 7.36-7.28(m, 5H), 7.15-7.13(m, 2H), 2.47(s, 3H); <sup>13</sup>C NMR (CDCl<sub>3</sub>, 100 MHz) δ(ppm):167.8, 149.0, 145.5, 139.7, 136.5, 134.6, 130.4, 130.1, 129.8, 129.6, 129.5, 123.2, 21.8. HRMS (ESI) m/z (M<sup>+</sup>) calcd for C<sub>20</sub>H<sub>17</sub>N<sub>2</sub>O<sub>5</sub>S 397.0858, found 397.0861.

#### **4-methyl-N-phenyl-N-tosylbenzamide 1j**

Following the general procedure B. White solid (88%), mp 137-138°C, <sup>1</sup>H NMR (CDCl<sub>3</sub>, 400 MHz) δ(ppm):7.81(d, J=8.0Hz, 2H), 7.36(d, J=8.0Hz, 2H), 7.31-7.26 (m, 5H), 7.17-7.15(m, 2H), 6.96(d, J=8.0Hz, 2H), 2.44(s, 3H), 2.23(s, 3H); <sup>13</sup>C NMR (CDCl<sub>3</sub>, 100 MHz) δ(ppm):169.9, 144.8, 142.6, 137.6, 135.3, 130.7, 130.3, 129.8, 129.5, 129.2, 129.1, 129.0, 128.8, 21.7, 21.5. HRMS (ESI) m/z (M<sup>+</sup>) calcd for C<sub>21</sub>H<sub>20</sub>NO<sub>3</sub>S 366.1164, found 366.1168.

#### **4-methoxy-N-phenyl-N-tosylbenzamide 1k**

Following the general procedure A. White solid (79%), mp 138-139°C, <sup>1</sup>H NMR (CDCl<sub>3</sub>, 400 MHz) δ(ppm):7.79(d, J=8.0Hz, 2H), 7.47(d, J=8.8Hz, 2H), 7.30-7.28 (m, 5H), 7.18-7.16(m, 2H), 6.66(d, J=9.2Hz, 2H), 3.72(s, 3H), 2.44(s, 3H); <sup>13</sup>C NMR (CDCl<sub>3</sub>, 100 MHz) δ(ppm):169.5, 162.5, 144.7, 137.9, 135.3, 132.1, 130.2, 129.4, 129.18, 129.15, 128.9, 125.5, 113.4, 55.3, 21.7. HRMS (ESI) m/z (M<sup>+</sup>) calcd for C<sub>21</sub>H<sub>20</sub>NO<sub>4</sub>S 382.1113, found 382.1111.

### **tert-butyl (4-(phenyl(tosyl)carbamoyl)phenyl)carbamate 1l**

Following the general procedure B. White solid (68%), mp 206-207°C, <sup>1</sup>H NMR (CDCl<sub>3</sub>, 400 MHz) δ(ppm): 7.79(d, J=8.0Hz, 2H), 7.42(d, J=8.4Hz, 2H), 7.37-7.26(m, 5H), 7.17(d, J=8.4Hz, 4H), 6.58(br.s, 1H), 2.43(s, 3H), 1.46(s, 9H); <sup>13</sup>C NMR (CDCl<sub>3</sub>, 100 MHz) δ(ppm): 169.4, 152.2, 144.8, 142.1, 137.7, 135.2, 131.2, 130.2, 129.4, 129.2, 129.0, 127.1, 117.0, 81.1, 28.2, 21.7. HRMS (ESI) m/z (M<sup>+</sup>) calcd for C<sub>25</sub>H<sub>27</sub>N<sub>2</sub>O<sub>5</sub>S 467.1641, found 467.1642.

### **N-phenyl-N-tosylfuran-2-carboxamide 1m**

Following the general procedure B. White solid (81%), mp 133-134°C, <sup>1</sup>H NMR (CDCl<sub>3</sub>, 400 MHz) δ(ppm): 7.92(d, J=8.4Hz, 2H), 7.50-7.43(m, 3H), 7.34-7.29(m, 5H), 6.21(dd, J=3.6, 1.6Hz, 1H), 5.95(d, J=3.6Hz, 1H), 2.45(s, 3H); <sup>13</sup>C NMR (CDCl<sub>3</sub>, 100 MHz) δ(ppm): 157.9, 146.5, 145.4, 145.1, 136.5, 135.6, 130.5, 130.1, 129.53, 129.49, 129.4, 119.8, 111.8, 21.7. HRMS (ESI) m/z (M<sup>+</sup>) calcd for C<sub>18</sub>H<sub>16</sub>NO<sub>4</sub>S 342.0800, found 342.0804.

### **N-phenyl-N-tosylthiophene-2-carboxamide 1n**

Following the general procedure B. White solid (85%), mp 155-156°C, <sup>1</sup>H NMR (CDCl<sub>3</sub>, 400 MHz) δ(ppm): 7.90(d, J=8.4Hz, 2H), 7.53-7.44(m, 3H), 7.39(dd, J=5.2, 1.2Hz, 1H), 7.36-7.33(m, 4H), 6.94(dd, J=4.0, 1.2Hz, 1H), 6.81-6.78(m, 1H), 2.45(s, 3H); <sup>13</sup>C NMR (CDCl<sub>3</sub>, 100 MHz) δ(ppm): 162.0, 145.0, 136.7, 136.4, 135.7, 135.0, 133.8, 131.0, 130.3, 129.7, 129.5, 129.4, 127.3, 21.8. HRMS (ESI) m/z (M<sup>+</sup>) calcd for C<sub>18</sub>H<sub>16</sub>NO<sub>3</sub>S<sub>2</sub> 358.0572, found 358.0572.

### **N-phenyl-N-tosylcinnamamide 1o**

Following the general procedure B. White solid (71%), mp 186-187°C, <sup>1</sup>H NMR (CDCl<sub>3</sub>, 400 MHz) δ(ppm): 7.96(d, J=8.4Hz, 2H), 7.66(d, J=15.6Hz, 1H), 7.56-7.50(m, 3H), 7.37-7.21(m, 9H), 6.04(d, J=15.6Hz, 1H), 2.45(s, 3H); <sup>13</sup>C NMR (CDCl<sub>3</sub>, 100 MHz) δ(ppm): 165.5, 145.8, 145.0, 136.2, 136.0, 134.1, 130.7, 130.5, 130.1, 129.9, 129.5, 129.3, 128.9, 128.3, 117.8, 21.8. HRMS (ESI) m/z (M<sup>+</sup>) calcd for C<sub>22</sub>H<sub>20</sub>NO<sub>3</sub>S 378.1164, found 378.1161.

### **N,3-diphenyl-N-tosylpropanamide 1p**

Following the general procedure B. Light yellow solid (79%), mp 125-126°C, <sup>1</sup>H NMR (CDCl<sub>3</sub>, 400 MHz) δ(ppm): 7.93(d, J=8.4Hz, 2H), 7.46-7.40(m, 3H), 7.36(d, J=8.4Hz, 2H), 7.18-7.11(m, 5H), 6.95-6.93(m, 2H), 2.81(t, J=8.0Hz, 2H), 2.47(s, 3H), 2.29(t, J=8.0Hz, 2H); <sup>13</sup>C NMR (CDCl<sub>3</sub>, 100 MHz) δ(ppm): 172.1, 145.0, 140.1, 136.22, 136.17, 130.1, 129.9, 129.5, 129.3, 128.5, 128.4, 126.3, 38.5, 30.7, 21.8. HRMS (ESI) m/z (M<sup>+</sup>) calcd for C<sub>22</sub>H<sub>21</sub>NO<sub>3</sub>SNa 402.1140, found 402.1140.

### **N-phenyl-N-tosylstearamide 1q**

Following the general procedure B. White solid (76%), mp 104-105°C, <sup>1</sup>H NMR (CDCl<sub>3</sub>, 400 MHz) δ(ppm):7.93(d, J=8.4Hz, 2H), 7.50-7.48(m, 3H), 7.34(d, J=8.0Hz, 2H), 7.27(d, J=4.0Hz, 2H), 2.45(s, 3H), 1.98(t, J=7.2Hz, 2H), 1.25-1.11(m, 30H), 0.89-0.86(m, 3H); <sup>13</sup>C NMR (CDCl<sub>3</sub>, 100 MHz) δ(ppm):172.9, 144.8, 136.5, 136.4, 130.1, 129.9, 129.8, 129.4, 129.2, 36.7, 31.9, 29.7, 29.4, 29.1, 28.8, 24.3, 22.7, 21.7, 14.1. HRMS (EI) m/z (M<sup>+</sup>) calcd for C<sub>31</sub>H<sub>47</sub>NO<sub>3</sub>S 513.3277, found 513.3279.

### **N-phenyl-N-tosylcyclohexanecarboxamide 1r**

Following the general procedure B. White solid (81%), mp 144-145°C, <sup>1</sup>H NMR (CDCl<sub>3</sub>, 400 MHz) δ(ppm):7.89(d, J=8.4Hz, 2H), 7.50-7.47(m, 3H), 7.32(d, J=8.0Hz, 2H), 7.28-7.26(m, 2H), 2.44(s, 3H), 2.03-1.97(m, 1H), 1.63-1.33(m, 7H), 1.11-0.84(m, 3H); <sup>13</sup>C NMR (CDCl<sub>3</sub>, 100 MHz) δ(ppm):176.2, 144.7, 136.3, 130.1, 129.9, 129.7, 129.4, 129.1, 43.8, 29.0, 25.4, 25.1, 21.7. HRMS (EI) m/z (M<sup>+</sup>) calcd for C<sub>20</sub>H<sub>22</sub>NO<sub>3</sub>S 356.1320, found 356.1300.

### **(3r,5r,7r)-N-phenyl-N-tosyladamantane-1-carboxamide 1s**

Following the general procedure B. White solid (69%), mp 177-178°C, <sup>1</sup>H NMR (CDCl<sub>3</sub>, 400 MHz) δ(ppm):7.63(d, J=8.4Hz, 2H), 7.43-7.36(m, 3H), 7.23(d, J=8.4Hz, 2H), 7.18(d, J=7.6Hz, 2H), 2.40(s, 3H), 1.86-1.47(m, 15H); <sup>13</sup>C NMR (CDCl<sub>3</sub>, 100 MHz) δ(ppm):181.4, 144.2, 136.1, 135.3, 130.3, 129.5, 129.4, 129.03, 128.97, 46.4, 39.6, 36.1, 28.0, 21.6. HRMS (EI) m/z (M<sup>+</sup>) calcd for C<sub>24</sub>H<sub>27</sub>NO<sub>3</sub>S 409.1712, found 409.1714.

### **2-methyl-N-phenyl-N-tosylbenzamide 1t**

Following the general procedure B. White solid (84%), mp 142-143°C, <sup>1</sup>H NMR (CDCl<sub>3</sub>, 400 MHz) δ(ppm):7.91(d, J=8.4Hz, 2H), 7.35(d, J=8.0Hz, 2H), 7.26-7.23 (m, 3H), 7.13-7.11(m, 2H), 7.09-7.05(m, 2H), 6.98(d, J=7.2Hz, 1H), 6.92(t, J=7.2Hz, 1H), 2.47(s, 3H), 2.22(s, 3H); <sup>13</sup>C NMR (CDCl<sub>3</sub>, 100 MHz) δ(ppm):170.2, 145.0, 136.5, 135.7, 134.4, 130.5, 130.1, 130.0, 129.4, 129.3, 129.1, 127.6, 125.0, 21.8, 19.4. HRMS (ESI) m/z (M<sup>+</sup>) calcd for C<sub>21</sub>H<sub>20</sub>NO<sub>3</sub>S 366.1164, found 366.1160.

### **(3r,5r,7r)-N-(3,5-bis(trifluoromethyl)phenyl)-N-tosyladamantane-1-carboxamide 1u**

Following the general procedure B. White solid (76%), mp 139-140°C, <sup>1</sup>H NMR (CDCl<sub>3</sub>, 400 MHz) δ(ppm):7.95(s, 1H), 7.62(s, 2H), 7.57(d, J=8.0Hz, 2H), 7.26(d, J=8.4Hz, 2H), 2.43(s, 3H), 1.95-1.91(m, 5H), 1.66-1.59(m, 10H); <sup>13</sup>C NMR (CDCl<sub>3</sub>, 100 MHz) δ(ppm): 180.0, 144.2, 137.2, 133.3, 131.7(q, J=28.1Hz), 128.9(d, J=2.6Hz), 128.32, 128.29, 121.8-121.7(m), 121.5(q, J=271.4Hz), 45.9, 38.8, 37.3, 35.3, 34.9,



26.8, 26.7, 20.6. HRMS (ESI)  $m/z$  ( $M^+$ ) calcd for  $C_{26}H_{25}F_6NO_3SNa$  568.1352, found 568.1356.

#### **N-(3,5-bis(trifluoromethyl)phenyl)-2-methyl-N-tosylbenzamide 1v**

Following the general procedure B. White solid (88%), mp 99-100°C,  $^1H$  NMR ( $CDCl_3$ , 400 MHz)  $\delta$ (ppm):7.82-7.77(m, 3H), 7.54(s, 2H), 7.38(d,  $J=8.0$ Hz, 2H), 7.18-7.14(m, 1H), 7.06-6.98(m, 3H), 2.50(s, 3H), 2.21(s, 3H);  $^{13}C$  NMR ( $CDCl_3$ , 100 MHz)  $\delta$ (ppm): 169.4, 146.0, 138.3, 135.7, 134.8, 133.6, 132.5(q,  $J=33.9$ Hz), 130.8, 130.7, 130.4(d,  $J=2.9$ Hz), 129.7, 129.2, 127.3, 125.4, 122.9-122.7(m), 122.4(q,  $J=271.3$ Hz), 21.8, 19.1. HRMS (ESI)  $m/z$  ( $M^+$ ) calcd for  $C_{23}H_{17}F_6NO_3SNa$  524.0726, found 524.0731.

#### **4-chloro-N-phenyl-N-tosylbenzamide 1w**

Following the general procedure B. White solid (88%), mp 138-139°C,  $^1H$  NMR ( $CDCl_3$ , 400 MHz)  $\delta$ (ppm):7.81(d,  $J=8.4$ Hz, 2H), 7.38(d,  $J=8.8$ Hz, 2H), 7.33-7.26 (m, 5H), 7.14(dd,  $J=8.4$ , 2.0Hz, 4H), 2.45(s, 3H);  $^{13}C$  NMR ( $CDCl_3$ , 100 MHz)  $\delta$ (ppm):168.9, 145.1, 138.1, 137.2, 135.0, 132.1, 130.9, 130.3, 129.5, 129.3, 128.4, 21.7. HRMS (ESI)  $m/z$  ( $M^+$ ) calcd for  $C_{20}H_{17}NO_3SCl$  386.0618, found 386.0619.

#### **4-bromo-N-phenyl-N-tosylbenzamide 1x**

Following the general procedure B. White solid (86%), mp 148-149°C,  $^1H$  NMR ( $CDCl_3$ , 400 MHz)  $\delta$ (ppm):7.81(d,  $J=8.4$ Hz, 2H), 7.34-7.27(m, 9H), 7.15-7.12 (m, 2H), 2.45(s, 3H);  $^{13}C$  NMR ( $CDCl_3$ , 100 MHz)  $\delta$ (ppm):169.0, 145.1, 137.2, 135.0, 132.5, 131.4, 131.0, 130.3, 129.5, 129.3, 126.7, 21.8. HRMS (ESI)  $m/z$  ( $M^+$ ) calcd for  $C_{20}H_{17}NO_3SBr$  430.0113, found 430.0117.

#### **N-(4-acetylphenyl)-2-methyl-N-tosylbenzamide 1t-1**

Following the general procedure B. White solid (83%), mp 147-148°C,  $^1H$  NMR ( $CDCl_3$ , 400 MHz)  $\delta$ (ppm):7.88(d,  $J=8.4$ Hz, 2H), 7.83(d,  $J=8.4$ Hz, 2H), 7.36(d,  $J=8.0$ Hz, 2H), 7.22(d,  $J=8.8$ Hz, 2H), 7.12-7.07(m, 2H), 7.00(d,  $J=7.6$ Hz, 1H), 6.93(t,  $J=7.6$ Hz, 1H), 2.54(s, 3H), 2.48(s, 3H), 2.23(s, 3H);  $^{13}C$  NMR ( $CDCl_3$ , 100 MHz)  $\delta$ (ppm):196.9, 169.7, 145.4, 140.6, 137.1, 135.9, 135.3, 134.0, 130.7, 130.4, 130.3, 129.5, 129.3, 129.0, 127.7, 125.2, 26.7, 21.8, 19.4. HRMS (ESI)  $m/z$  ( $M^+$ ) calcd for  $C_{23}H_{21}NO_4SNa$  430.1083, found 430.1085.

#### **N-(2,4-difluorophenyl)-2-methyl-N-tosylbenzamide 1t-2**

Following the general procedure B. White solid (76%), mp 147-148°C,  $^1H$  NMR ( $CDCl_3$ , 400 MHz)  $\delta$ (ppm):7.94(d,  $J=8.4$ Hz, 2H), 7.36-7.31(m, 3H), 7.15-7.11(m, 1H), 7.04(t,  $J=8.0$ Hz, 2H), 6.94(t,  $J=7.6$ Hz, 1H), 6.84-6.80(m, 1H), 6.77-6.71(m, 1H), 2.47(s, 3H), 2.22(s, 3H);  $^{13}C$  NMR ( $CDCl_3$ , 100 MHz)  $\delta$ (ppm):169.5, 163.2(qd,

J=12.1, 252.1Hz), 145.4, 136.0, 135.4, 133.5, 133.1, 133.0, 130.6, 130.3, 129.43, 129.39, 126.7, 125.0, 120.9(dd, J=4.2, 13.2Hz), 112.0(dd, J=3.6, 22.4Hz), 104.9(dd, J=24.0, 26.2Hz), 21.8, 19.1. HRMS (ESI) m/z ( $M^+$ ) calcd for  $C_{21}H_{17}F_2NO_3SNa$  424.0789, found 424.0792.

### **2-methyl-N-tosyl-N-(3-(trifluoromethyl)phenyl)benzamide 1t-3**

Following the general procedure B. White solid (86%), mp 85-86°C,  $^1H$  NMR ( $CDCl_3$ , 400 MHz)  $\delta$ (ppm):7.87(d, J=8.4Hz, 2H), 7.51(d, J=7.2Hz, 1H), 7.41-7.31(m, 5H), 7.10(t, J=7.6Hz, 1H), 7.02(q, J=7.6Hz, 2H), 6.94(t, J=7.6Hz, 1H), 2.47(s, 3H), 2.21(s, 3H);  $^{13}C$  NMR ( $CDCl_3$ , 100 MHz)  $\delta$ (ppm):169.8, 145.5, 137.2, 135.6, 135.2, 134.0, 133.5, 131.5(q, J=33.0Hz), 130.6, 130.3, 129.7, 129.6, 129.2, 127.4, 127.0(q, J=3.6Hz), 126.0(q, J=3.5Hz), 125.2, 123.2(q, J=270.9Hz), 21.7, 19.2. HRMS (ESI) m/z ( $M^+$ ) calcd for  $C_{22}H_{18}F_3NO_3SNa$  456.0852, found 456.0857.

### **2-methyl-N-tosyl-N-(4-(trifluoromethyl)phenyl)benzamide 1t-4**

Following the general procedure B. White solid (78%), mp 128-129°C,  $^1H$  NMR ( $CDCl_3$ , 400 MHz)  $\delta$ (ppm):7.87(d, J=8.0Hz, 2H), 7.52(d, J=8.0Hz, 2H), 7.36(d, J=8.0Hz, 2H), 7.25(d, J=7.2Hz, 2H), 7.15-7.11(m, 1H), 7.08-7.01(m, 2H), 6.95(t, J=7.6Hz, 1H), 2.48(s, 3H), 2.23(s, 3H);  $^{13}C$  NMR ( $CDCl_3$ , 100 MHz)  $\delta$ (ppm):169.7, 145.5, 139.8, 135.9, 135.3, 133.8, 131.1(q, J=32.8Hz), 130.7, 130.52, 130.46, 129.6, 129.3, 127.7, 126.2(q, J=3.5Hz), 125.3, 123.5(q, J=270.8Hz), 21.7, 19.4. HRMS (ESI) m/z ( $M^+$ ) calcd for  $C_{22}H_{18}F_3NO_3SNa$  456.0852, found 456.0859.

### **N-(3,5-difluorophenyl)-2-methyl-N-tosylbenzamide 1t-5**

Following the general procedure B. White solid (81%), mp 136-137°C,  $^1H$  NMR ( $CDCl_3$ , 400 MHz)  $\delta$ (ppm):7.89(d, J=8.4Hz, 2H), 7.37(d, J=8.0Hz, 2H), 7.18-7.14(m, 1H), 7.09-7.04(m, 2H), 7.00(t, J=7.6Hz, 1H), 6.77-6.69(m, 3H), 2.48(s, 3H), 2.22(s, 3H);  $^{13}C$  NMR ( $CDCl_3$ , 100 MHz)  $\delta$ (ppm):169.5, 162.4(dd, J=13.8, 249.4Hz), 145.6, 138.6(t, J=12.3Hz), 135.9, 135.2, 133.7, 130.7, 130.5, 129.6, 129.3, 127.5, 125.3, 113.9(dd, J=7.6, 19.1Hz), 105.3(t, J=25.0Hz), 21.8, 19.4. HRMS (ESI) m/z ( $M^+$ ) calcd for  $C_{21}H_{17}F_2NO_3SNa$  424.0789, found 424.0791.

### **benzophenone 3aa<sup>6</sup>**

Light yellow solid, mp 46-47°C,  $^1H$  NMR ( $CDCl_3$ , 400 MHz)  $\delta$ (ppm):7.71-7.69(m, 4H), 7.48(t, J=7.6Hz, 2H), 7.37(t, J=8.0Hz, 4H);  $^{13}C$  NMR ( $CDCl_3$ , 100 MHz)  $\delta$ (ppm):196.8, 137.6, 132.5, 130.1, 128.3.

### **phenyl(p-tolyl)methanone 3db<sup>6</sup>**

Light yellow solid, mp 57-58°C,  $^1H$  NMR ( $CDCl_3$ , 400 MHz)  $\delta$ (ppm):7.69-7.67(m, 2H), 7.62(d, J=8.0Hz, 2H), 7.47(t, J=7.6Hz, 1H), 7.36(t,

J=7.6Hz, 2H), 7.17(d, J=8.0Hz, 2H), 2.33(s, 3H); <sup>13</sup>C NMR (CDCl<sub>3</sub>, 100 MHz) δ(ppm):196.5, 143.3, 138.0, 134.9, 132.2, 130.3, 130.0, 129.0, 128.2, 21.7.

**(4-methoxyphenyl)(phenyl)methanone 3dc<sup>6</sup>**

White solid, mp 59-60°C, <sup>1</sup>H NMR (CDCl<sub>3</sub>, 400 MHz) δ(ppm):7.84-7.81(m, 2H), 7.76-7.74(m, 2H), 7.56(t, J=7.2Hz, 1H), 7.46(t, J=7.6Hz, 2H), 6.98-6.95(m, 2H), 3.87(s, 3H); <sup>13</sup>C NMR (CDCl<sub>3</sub>, 100 MHz) δ(ppm):195.6, 163.2, 138.3, 132.6, 131.9, 130.1, 129.7, 128.2, 113.6, 55.5.

**(4-fluorophenyl)(phenyl)methanone 3dd<sup>6</sup>**

Light yellow oil, <sup>1</sup>H NMR (CDCl<sub>3</sub>, 400 MHz) δ(ppm):7.86-7.83(m, 2H), 7.78-7.76(m, 2H), 7.61-7.57(m, 1H), 7.50-7.47(m, 2H), 7.18-7.13(m, 2H); <sup>13</sup>C NMR (CDCl<sub>3</sub>, 100 MHz) δ(ppm):195.2, 165.4(d, J=252.4Hz), 137.5, 133.8(d, J=2.9Hz), 132.7, 132.6(d, J=14.5Hz), 129.9, 128.4, 115.5(d, J=21.7Hz).

**methyl 4-benzoylbenzoate 3de<sup>7</sup>**

White solid, mp 107-108°C, <sup>1</sup>H NMR (CDCl<sub>3</sub>, 400 MHz) δ(ppm):8.15(d, J=8.4Hz, 2H), 7.85-7.79(m, 4H), 7.62(t, J=7.6Hz, 1H), 7.50(t, J=8.0Hz, 2H), 3.97(s, 3H); <sup>13</sup>C NMR (CDCl<sub>3</sub>, 100 MHz) δ(ppm):195.9, 166.3, 141.3, 136.9, 133.2, 132.9, 130.1, 129.8, 129.5, 128.5, 52.4.

**4-benzoylbenzotrile 3df<sup>7</sup>**

White solid, mp 110-111°C, <sup>1</sup>H NMR (CDCl<sub>3</sub>, 400 MHz) δ(ppm):7.88(d, J=8.4Hz, 2H), 7.80-7.78(m, 4H), 7.65(t, J=7.6Hz, 1H), 7.52(t, J=7.6Hz, 2H); <sup>13</sup>C NMR (CDCl<sub>3</sub>, 100 MHz) δ(ppm):195.0, 141.2, 136.3, 133.3, 132.2, 130.2, 130.1, 128.6, 118.0, 115.6.

**1-(4-benzoylphenyl)ethanone 3dg<sup>8</sup>**

Light yellow solid, mp 82-83°C, <sup>1</sup>H NMR (CDCl<sub>3</sub>, 400 MHz) δ(ppm):8.06(d, J=8.8Hz, 2H), 7.87(d, J=8.4Hz, 2H), 7.82-7.80(m, 2H), 7.65-7.61(m, 1H), 7.53-7.49(m, 2H), 2.67(s, 3H); <sup>13</sup>C NMR (CDCl<sub>3</sub>, 100 MHz) δ(ppm):197.5, 195.9, 141.3, 139.5, 136.9, 133.0, 130.1, 130.0, 128.5, 128.2, 26.9.

**naphthalen-1-yl(phenyl)methanone 3dh<sup>6</sup>**

Light yellow solid, mp 73-74°C, <sup>1</sup>H NMR (CDCl<sub>3</sub>, 400 MHz) δ(ppm):8.09(d, J=8.8Hz, 1H), 7.49(d, J=8.4Hz, 1H), 7.92-7.90(m, 1H), 7.87-7.85(m, 2H), 7.60-7.54(m, 2H), 7.53-7.43(m, 5H); <sup>13</sup>C NMR (CDCl<sub>3</sub>, 100 MHz) δ(ppm):198.1, 138.3, 136.4, 133.8, 133.3, 131.3, 131.0, 130.5, 128.51, 128.48, 127.8, 127.3, 126.5, 125.7, 124.4.

**phenyl(o-tolyl)methanone 3di<sup>6</sup>**

Light yellow oil, <sup>1</sup>H NMR (CDCl<sub>3</sub>, 400 MHz) δ(ppm):7.73-7.71(m, 2H), 7.50(t,

J=7.2Hz, 1H), 7.37(t, J=7.6Hz, 2H), 7.33-7.29(m, 1H), 7.24-7.15(m, 3H), 2.25(s, 3H); <sup>13</sup>C NMR (CDCl<sub>3</sub>, 100 MHz) δ(ppm):198.7, 138.6, 137.7, 136.8, 133.2, 131.0, 130.3, 130.2, 128.53, 128.48, 125.2, 20.0.

**(2-ethylphenyl)(phenyl)methanone 3dj**<sup>9</sup>

Light yellow oil, <sup>1</sup>H NMR (CDCl<sub>3</sub>, 400 MHz) δ(ppm):7.82-7.80(m, 2H), 7.59-7.54(m, 1H), 7.46-7.40(m, 3H), 7.34(d, J=7.2Hz, 1H), 7.28-7.22(m, 2H), 2.67(q, J=7.6Hz, 2H), 1.16(t, J=7.6Hz, 3H); <sup>13</sup>C NMR (CDCl<sub>3</sub>, 100 MHz) δ(ppm):198.8, 143.0, 138.4, 137.8, 133.2, 130.3, 130.2, 129.5, 128.5, 128.3, 125.2, 26.4, 16.0.

**methyl 2-benzoylbenzoate 3dk**<sup>10</sup>

Light yellow oil, <sup>1</sup>H NMR (CDCl<sub>3</sub>, 400 MHz) δ(ppm):8.05(d, J=7.6Hz, 1H), 7.75(d, J=7.2Hz, 2H), 7.66-7.62(m, 1H), 7.59-7.53(m, 2H), 7.45-7.41(m, 3H), 3.61(s, 3H); <sup>13</sup>C NMR (CDCl<sub>3</sub>, 100 MHz) δ(ppm):197.1, 166.4, 141.7, 137.2, 133.1, 132.4, 130.1, 129.7, 129.3, 128.5, 127.8, 52.2.

**phenyl(4-(trifluoromethyl)phenyl)methanone 3fa**<sup>6</sup>

White solid, mp 116-117°C, <sup>1</sup>H NMR (CDCl<sub>3</sub>, 400 MHz) δ(ppm):7.89(d, J=8.0Hz, 2H), 7.82-7.79(m, 2H), 7.76(d, J=8.0Hz, 2H), 7.65-7.61(m, 1H), 7.53-7.49(m, 2H); <sup>13</sup>C NMR (CDCl<sub>3</sub>, 100 MHz) δ(ppm):195.5, 140.7, 136.7, 133.7(q, J=32.4Hz), 133.1, 130.14, 130.10, 128.5, 125.3(q, J=3.6Hz), 122.3(q, J=271.1Hz).

**(4-nitrophenyl)(phenyl)methanone 3ia**<sup>6</sup>

Light yellow solid, mp 135-136°C, <sup>1</sup>H NMR (CDCl<sub>3</sub>, 400 MHz) δ(ppm):8.35-8.33(m, 2H), 7.96-7.93(m, 2H), 7.82-7.80(m, 2H), 7.66(t, J=7.6Hz, 1H), 7.53(t, J=8.0Hz, 2H); <sup>13</sup>C NMR (CDCl<sub>3</sub>, 100 MHz) δ(ppm):194.8, 149.8, 142.9, 136.3, 133.5, 130.7, 130.1, 128.7, 123.5.

**tert-butyl (4-benzoylphenyl)carbamate 3la**<sup>11</sup>

White solid, mp 179-180°C, <sup>1</sup>H NMR (CDCl<sub>3</sub>, 400 MHz) δ(ppm):7.81-7.75(m, 4H), 7.58-7.55(m, 1H), 7.51-7.45(m, 4H), 6.96(br.s, 1H), 1.53(s, 9H); <sup>13</sup>C NMR (CDCl<sub>3</sub>, 100 MHz) δ(ppm):195.8, 152.4, 142.8, 138.0, 132.1, 131.8, 131.7, 129.9, 128.2, 117.4, 81.2, 28.3.

**furan-2-yl(phenyl)methanone 3ma**<sup>7</sup>

Light yellow oil, <sup>1</sup>H NMR (CDCl<sub>3</sub>, 400 MHz) δ(ppm):7.97(d, J=7.2Hz, 2H), 7.71(s, 1H), 7.59(t, J=7.6Hz, 1H), 7.49(t, J=7.6Hz, 2H), 7.23(d, J=3.6Hz, 1H), 6.59-6.58(m, 1H); <sup>13</sup>C NMR (CDCl<sub>3</sub>, 100 MHz) δ(ppm):182.6, 152.3, 147.2, 137.3, 132.6, 129.3, 128.4, 120.6, 112.2.

**phenyl(thiophen-2-yl)methanone 3na**<sup>7</sup>

Light yellow oil, <sup>1</sup>H NMR (CDCl<sub>3</sub>, 400 MHz) δ(ppm):7.87-7.85(m, 2H), 7.71(dd,

J=4.8, 1.2Hz, 1H), 7.64(dd, J=4.0, 1.2Hz, 1H), 7.61-7.57(m, 1H), 7.51-7.47(m, 2H), 7.17-7.14(m, 1H); <sup>13</sup>C NMR (CDCl<sub>3</sub>, 100 MHz) δ(ppm):188.3, 143.6, 138.1, 134.9, 134.3, 132.3, 129.2, 128.4, 128.0.

**(E)-chalcone 3oa**<sup>12</sup>

Light yellow oil, <sup>1</sup>H NMR (CDCl<sub>3</sub>, 400 MHz) δ(ppm):8.02-8.00(m, 2H), 7.81(d, J=15.6Hz, 1H), 7.64-7.62(m, 2H), 7.59-7.47(m, 4H), 7.41-7.38(m, 3H); <sup>13</sup>C NMR (CDCl<sub>3</sub>, 100 MHz) δ(ppm):190.6, 144.9, 138.2, 134.9, 132.9, 130.6, 129.0, 128.7, 128.6, 128.5, 122.1.

**1,3-diphenylpropan-1-one 3pa**<sup>13</sup>

White solid, mp 71-72°C, <sup>1</sup>H NMR (CDCl<sub>3</sub>, 400 MHz) δ(ppm):7.93(d, J=8.4Hz, 2H), 7.54-7.50(m, 1H), 7.43-7.40(m, 2H), 7.30-7.17(m, 5H), 3.27(t, J=8.0Hz, 2H), 3.05(t, J=8.0Hz, 2H); <sup>13</sup>C NMR (CDCl<sub>3</sub>, 100 MHz) δ(ppm):199.3, 141.4, 136.9, 133.1, 128.7, 128.6, 128.5, 128.1, 126.2, 40.5, 30.2.

**1-phenyloctadecan-1-one 3qa**<sup>14</sup>

White solid, mp 62-63°C, <sup>1</sup>H NMR (CDCl<sub>3</sub>, 400 MHz) δ(ppm):7.97-7.94(m, 2H), 7.56-7.53(m, 1H), 7.45(t, J=7.6Hz, 2H), 2.96(t, J=7.2Hz, 2H), 1.77-1.67(m, 2H), 1.38-1.26(m, 28H), 0.88(t, J=7.2Hz, 3H); <sup>13</sup>C NMR (CDCl<sub>3</sub>, 100 MHz) δ(ppm):200.5, 137.1, 132.8, 128.5, 128.0, 38.6, 32.0, 29.8, 29.6, 29.4, 24.4, 22.7, 14.1.

**1-(o-tolyl)octadecan-1-one 3qi**

White solid, mp 44-45°C, <sup>1</sup>H NMR (CDCl<sub>3</sub>, 400 MHz) δ(ppm):7.60(d, J=7.6Hz, 1H), 7.37-7.33(m, 1H), 7.24(t, J=7.6Hz, 2H), 2.87(t, J=7.6Hz, 2H), 2.48(s, 3H), 1.73-1.65(m, 2H), 1.36-1.25(m, 28H), 0.88(t, J=7.2Hz, 3H); <sup>13</sup>C NMR (CDCl<sub>3</sub>, 100 MHz) δ(ppm):204.9, 138.4, 137.8, 131.9, 131.0, 128.3, 125.6, 41.7, 32.0, 29.73, 29.70, 29.6, 29.54, 29.51, 29.40, 29.37, 24.5, 22.7, 21.2, 14.1. HRMS (EI) m/z (M<sup>+</sup>) calcd for C<sub>25</sub>H<sub>42</sub>O 358.3244, found 358.3236.

**1-(2-ethylphenyl)octadecan-1-one 3qj**

White solid, mp 47-49°C, <sup>1</sup>H NMR (CDCl<sub>3</sub>, 400 MHz) δ(ppm):7.53(dd, J=7.6, 1.2Hz, 1H), 7.39-7.35(m, 1H), 7.27-7.21(m, 2H), 2.86(t, J=7.2Hz, 2H), 2.80(q, J=7.2Hz, 2H), 1.73-1.66(m, 2H), 1.30-1.20(m, 31H), 0.88(t, J=7.2Hz, 3H); <sup>13</sup>C NMR (CDCl<sub>3</sub>, 100 MHz) δ(ppm):205.4, 143.6, 138.7, 130.9, 130.3, 127.9, 125.5, 42.2, 32.0, 29.74, 29.70, 29.66, 29.5, 29.41, 29.36, 26.9, 24.4, 22.7, 16.1, 14.1. HRMS (EI) m/z (M<sup>+</sup>) calcd for C<sub>26</sub>H<sub>44</sub>O 372.3397, found 372.3392.

**cyclohexyl(phenyl)methanone 3ra**<sup>15</sup>

White solid, mp 55-56°C, <sup>1</sup>H NMR (CDCl<sub>3</sub>, 400 MHz) δ(ppm):7.95-7.93(m, 2H), 7.56-7.52(m, 1H), 7.47-7.43(m, 2H), 3.30-3.23(m, 1H), 1.91-1.82(m, 3H),

1.76-1.72(m, 2H), 1.52-1.26(m, 5H); <sup>13</sup>C NMR (CDCl<sub>3</sub>, 100 MHz) δ(ppm):203.9, 136.3, 132.7, 128.6, 128.3, 45.6, 29.4, 26.0, 25.9.

**cyclohexyl(o-tolyl)methanone 3ri**<sup>16</sup>

Colorless oil, <sup>1</sup>H NMR (CDCl<sub>3</sub>, 400 MHz) δ(ppm):7.42-7.40(m, 1H), 7.27-7.23(m, 1H), 7.19-7.14(m, 2H), 2.99-2.92(m, 1H), 2.33(s, 3H), 1.80-1.71(m, 5H), 1.38-1.17(m, 5H); <sup>13</sup>C NMR (CDCl<sub>3</sub>, 100 MHz) δ(ppm):208.8, 138.9, 137.2, 131.5, 130.4, 127.3, 125.5, 49.0, 28.8, 26.0, 25.8, 20.6.

**(3r,5r,7r)-adamantan-1-yl(phenyl)methanone 3sa**<sup>15</sup>

Light yellow oil, <sup>1</sup>H NMR (CDCl<sub>3</sub>, 400 MHz) δ(ppm):7.55-7.53(m, 2H), 7.44-7.35(m, 3H), 2.07-2.00(m, 10H), 1.78-1.70(m, 5H); <sup>13</sup>C NMR (CDCl<sub>3</sub>, 100 MHz) δ(ppm):210.2, 139.6, 130.2, 128.0, 127.1, 46.9, 39.1, 36.5, 28.1.

**(3r,5r,7r)-adamantan-1-yl(o-tolyl)methanone 3ui**<sup>17</sup>

Light yellow solid, mp 68-69°C, <sup>1</sup>H NMR (CDCl<sub>3</sub>, 400 MHz) δ(ppm):7.18-7.14(m, 1H), 7.11-7.05(m, 2H), 7.00(d, J=7.6Hz, 1H), 2.12(s, 3H), 1.95(s, 3H), 1.84-1.83(m, 6H), 1.66-1.58(m, 6H); <sup>13</sup>C NMR (CDCl<sub>3</sub>, 100 MHz) δ(ppm):214.1, 140.7, 133.9, 130.6, 128.4, 124.68, 124.65, 47.3, 38.6, 36.5, 28.0, 19.9.

**(3r,5r,7r)-adamantan-1-yl(2-ethylphenyl)methanone 3uj**

Light yellow oil, <sup>1</sup>H NMR (CDCl<sub>3</sub>, 400 MHz) δ(ppm):7.23-7.17(m, 2H), 7.10-7.06(m, 1H), 7.00(d, J=7.6Hz, 1H), 2.39(q, J=7.6Hz, 2H), 1.95(s, 3H), 1.83-1.82(m, 6H), 1.68-1.58(m, 6H), 1.13(t, J=7.6Hz, 3H); <sup>13</sup>C NMR (CDCl<sub>3</sub>, 100 MHz) δ(ppm):213.3, 139.1, 127.7, 127.5, 123.7, 123.6, 46.1, 37.7, 35.4, 27.0, 25.7, 14.7. HRMS (EI) m/z (M<sup>+</sup>) calcd for C<sub>19</sub>H<sub>24</sub>O 268.1830, found 268.1827.

**di-o-tolylmethanone 3vi**<sup>18</sup>

Light yellow oil, <sup>1</sup>H NMR (CDCl<sub>3</sub>, 400 MHz) δ(ppm):7.27(t, J=7.6Hz, 2H), 7.21-7.13(m, 4H), 7.08(t, J=7.6Hz, 2H), 2.34(s, 6H); <sup>13</sup>C NMR (CDCl<sub>3</sub>, 100 MHz) δ(ppm):200.8, 139.0, 138.2, 131.5, 131.1, 130.3, 125.5, 20.7.

**(2-ethylphenyl)(o-tolyl)methanone 3vj**

Light yellow oil, <sup>1</sup>H NMR (CDCl<sub>3</sub>, 400 MHz) δ(ppm):7.33-7.26(m, 2H), 7.23-7.15(m, 4H), 7.10-7.06(m, 2H), 2.70(q, J=7.6Hz, 2H), 2.39(s, 3H), 1.12(t, J=7.6Hz, 3H); <sup>13</sup>C NMR (CDCl<sub>3</sub>, 100 MHz) δ(ppm):200.9, 144.2, 139.1, 138.8, 138.6, 131.6, 131.3, 131.0, 130.9, 130.0, 129.9, 125.4, 26.7, 20.9, 16.0. HRMS (EI) m/z (M<sup>+</sup>) calcd for C<sub>16</sub>H<sub>16</sub>O 224.1202, found 224.1201.

**4'-methoxy-N-phenyl-N-tosyl-[1,1'-biphenyl]-4-carboxamide 4**

White solid, mp 148-149°C, <sup>1</sup>H NMR (CDCl<sub>3</sub>, 400 MHz) δ(ppm):7.83(d, J=8.0Hz, 2H), 7.51(d, J=8.0Hz, 2H), 7.42(d, J=8.4Hz, 2H), 7.36-7.26(m, 7H),

7.20-7.19(m, 2H), 6.91(d, J=8.4Hz, 2H), 3.81(s, 3H), 2.45(s, 3H); <sup>13</sup>C NMR (CDCl<sub>3</sub>, 100 MHz) δ(ppm):169.7, 159.9, 144.8, 144.1, 137.6, 135.3, 131.8, 131.5, 130.4, 130.3, 129.5, 129.3, 129.2, 129.1, 128.2, 126.0, 114.3, 55.4, 21.7. HRMS (EI) m/z (M<sup>+</sup>) calcd for C<sub>27</sub>H<sub>23</sub>NO<sub>4</sub>S 457.1348, found 457.1346.

#### **(4'-methoxy-[1,1'-biphenyl]-4-yl)(p-tolyl)methanone 5**

White solid, mp 181-183°C, <sup>1</sup>H NMR (CDCl<sub>3</sub>, 400 MHz) δ(ppm):7.76(d, J=8.4Hz, 2H), 7.66(d, J=8.0Hz, 2H), 7.56(d, J=8.4Hz, 2H), 7.50(d, J=8.8Hz, 2H), 7.20(d, J=8.0Hz, 2H), 6.92(d, J=8.8Hz, 2H), 3.77(s, 3H), 2.36(s, 3H); <sup>13</sup>C NMR (CDCl<sub>3</sub>, 100 MHz) δ(ppm):196.1, 159.9, 144.6, 143.1, 136.0, 135.1, 132.4, 130.7, 130.3, 129.0, 128.4, 126.3, 114.4, 55.4, 21.7. HRMS (EI) m/z (M<sup>+</sup>) calcd for C<sub>21</sub>H<sub>18</sub>O<sub>2</sub> 302.1307, found 302.1309.

#### **(4'-methyl-[1,1'-biphenyl]-4-yl)(p-tolyl)methanone 6**

White solid, mp 149-150°C, <sup>1</sup>H NMR (CDCl<sub>3</sub>, 400 MHz) δ(ppm):7.85(d, J=8.0Hz, 2H), 7.74(d, J=8.0Hz, 2H), 7.66(d, J=8.0Hz, 2H), 7.53(d, J=8.0Hz, 2H), 7.29-7.22(m, 4H), 2.43(s, 3H), 2.39(s, 3H); <sup>13</sup>C NMR (CDCl<sub>3</sub>, 100 MHz) δ(ppm):196.1, 145.0, 143.2, 138.1, 137.1, 136.3, 135.1, 130.7, 130.3, 129.7, 129.0, 127.2, 126.7, 21.7, 21.2. HRMS (EI) m/z (M<sup>+</sup>) calcd for C<sub>21</sub>H<sub>18</sub>O 286.1357, found 286.1358.

## **8. References**

- (1) H. Khan, A. Badshah, G. Murtaz, M. Said, Z. Rehman, C. Neuhausen, M. Todorova, B. J. Jean-Claude, I. Butler, *Eur. J. Med. Chem.* 2011, **46**, 4071-4077.
- (2) C. A. Goodman, J. B. Eagles, L. Rudahindwa, C. G. Hamaker, S. R. Hitchcock, *Synth. Commun.* 2013, **43**, 2155-2164.
- (3) L. Grehn, K. Gunnarsson, U. Ragnarsson, *J. Chem. Soc., Chem. Commun.* 1985, **19**, 1317-1318.
- (4) M. H. Yates, N. J. Kallman, C. P. Ley, J. N. Wei, *Org. Process Res. Dev.* 2009, **13**, 255-262.
- (5) P. Oxley, W. F. Short, *J. Chem. Soc.* 1947, 382-389.
- (6) Y. Zhong, W. Han, *Chem. Commun.* 2014, **50**, 3874-3877.
- (7) J. Karthikeyan, K. Parthasarathy, C.-H. Cheng, *Chem. Commun.* 2011, **47**, 10461-10463.
- (8) S. D. Ramgren, N. K. Garg, *Org. Lett.* 2014, **16**, 824-827.
- (9) M. A. Fernandez-ibanez, B. Macia, A. J. Minnaard, B. L. Feringa, *Org. Lett.* 2008, **10**, 4041-4044.
- (10) Y. Zhu, H. Yan, L. Lu, D. Liu, G. Rong, J. Mao, *J. Org. Chem.* 2013, **78**, 9898-9905.
- (11) N. A. Isley, S. Dobarco, B. H. Lipshutz, *Green Chem.* 2014, **16**, 1480-1488.
- (12) Y. Zhu, B. Zhao, Y. Shi, *Org. Lett.* 2013, **15**, 992-995.

- (13) Q. Xu, J. Chen, H. Tian, X. Yuan, S. Li, C. Zhou, J. Liu, *Angew. Chem.* 2014, 126, 229-233; *Angew. Chem. Int. Ed.* 2014, 53, 225-229.
- (14) D. A. Hrovat, J. H. Liu, N. J. Turro, R. G. Weiss, *J. Am. Chem. Soc.* 1984, 106, 7033-7037.
- (15) S. Sumino, T. Ui, I. Ryu, *Org. Lett.* 2013, 15, 3142.
- (16) Á. Gutiérrez-Bonet, A. Flores-Gaspar, R. Martín, *J. Am. Chem. Soc.* 2013, 135, 12576-12579.
- (17) M. J. Lo Fiego, M. T. Lockhart, A. B. Chopa, *J. Organomet. Chem.* 2009, 694, 3674-3678.
- (18) T. Ishiyama, J. Hartwig, *J. Am. Chem. Soc.* 2000, 122, 12043-12044.



## 9. $^1\text{H}$ and $^{13}\text{C}$ NMR spectra of the carboxylic amide and ketones

### 1-benzoylpyrrolidine-2,5-dione **1a**

#### $^1\text{H}$ NMR

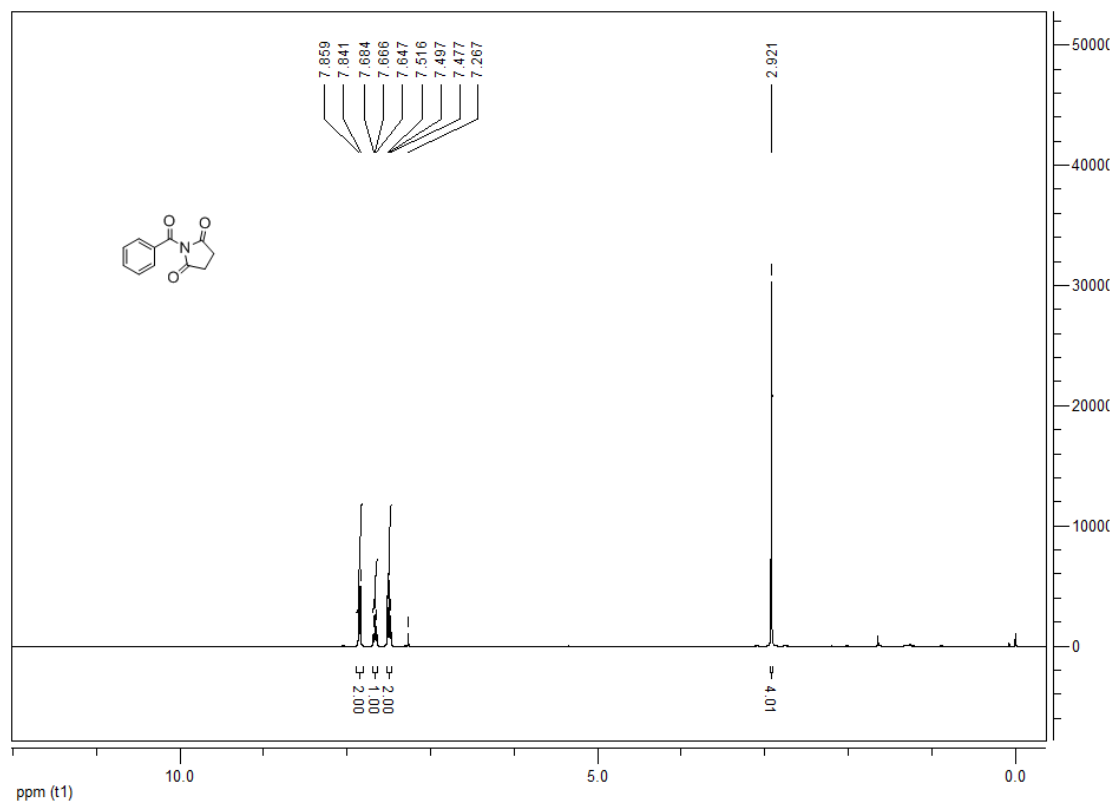

#### $^{13}\text{C}$ NMR

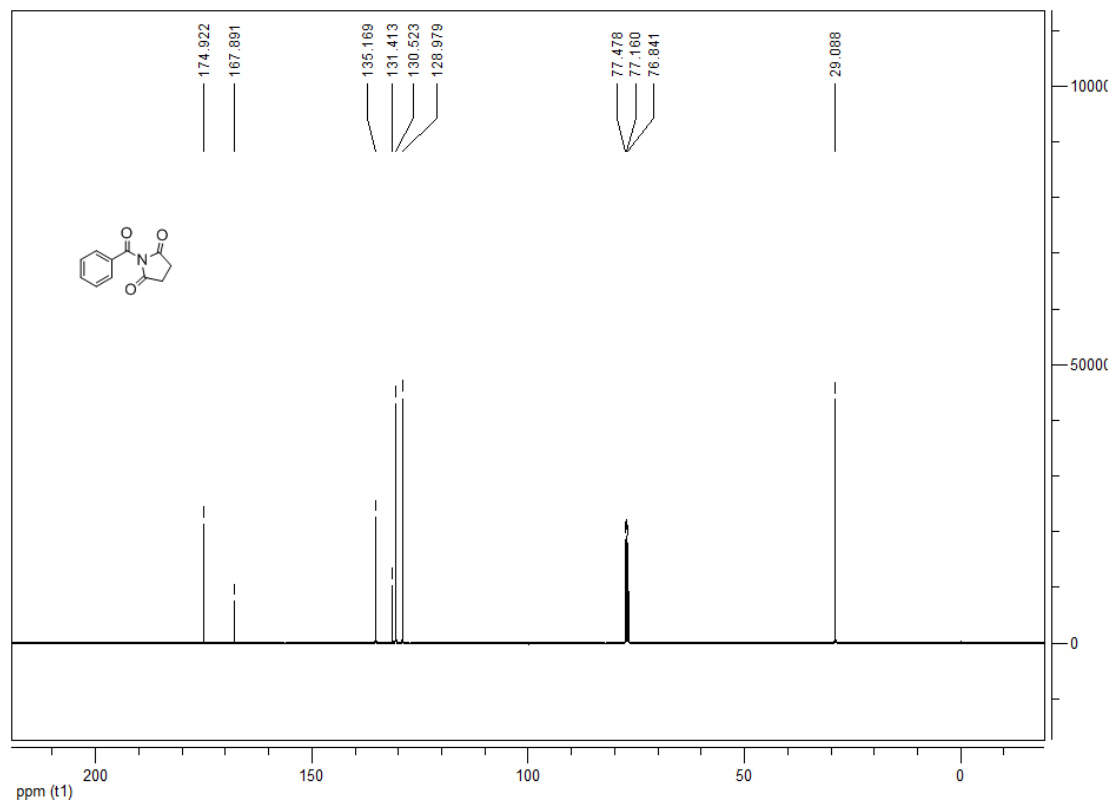

# tert-butyl benzoyl(phenyl)carbamate 1b

## <sup>1</sup>H NMR

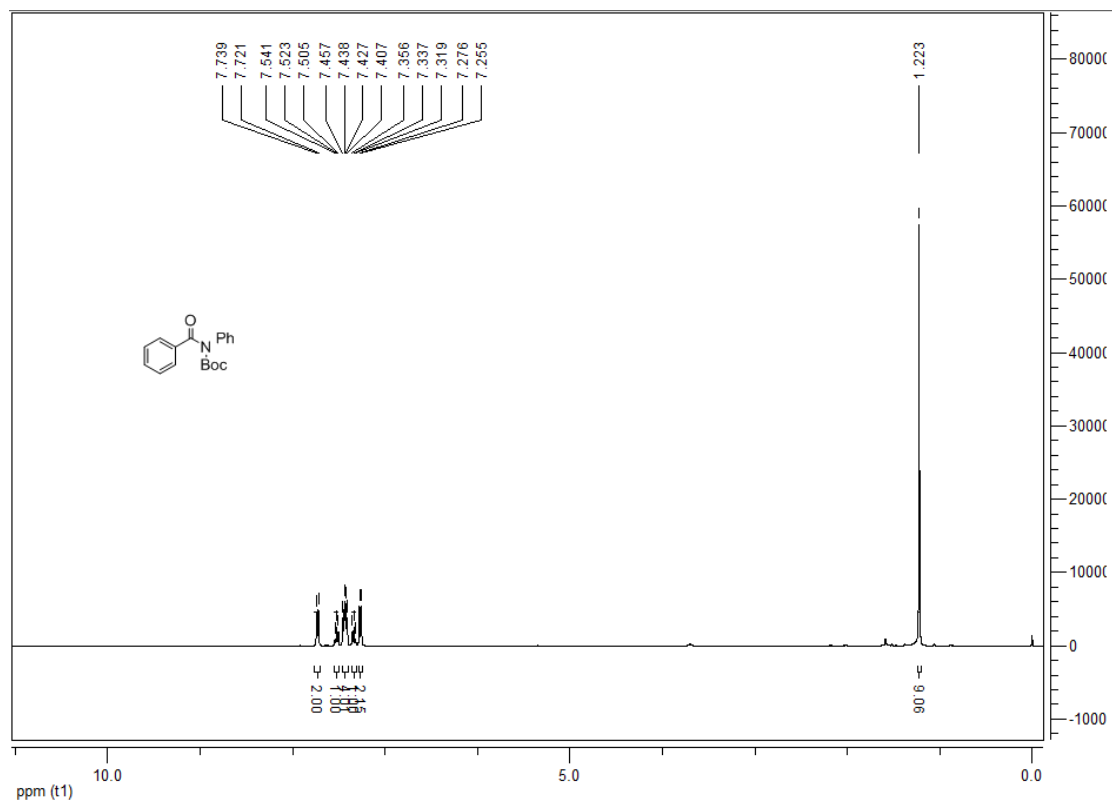

## <sup>13</sup>C NMR

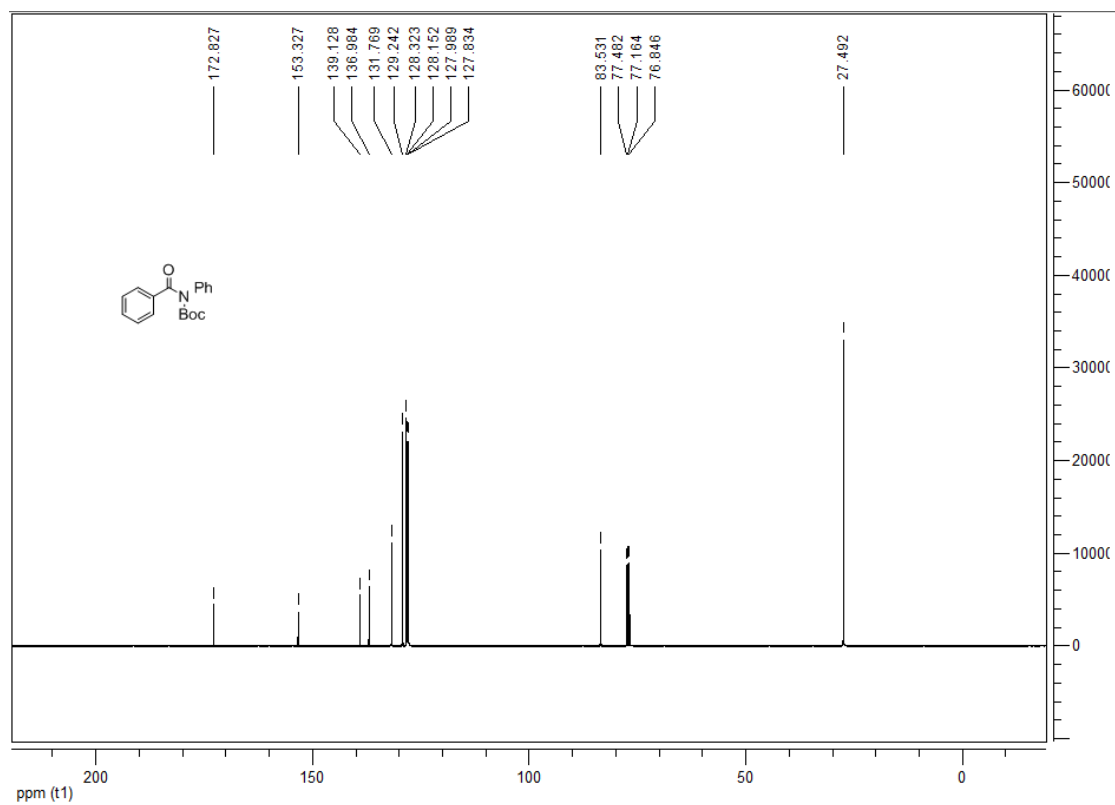

# N-methyl-N-tosylbenzamide 1c

## <sup>1</sup>H NMR

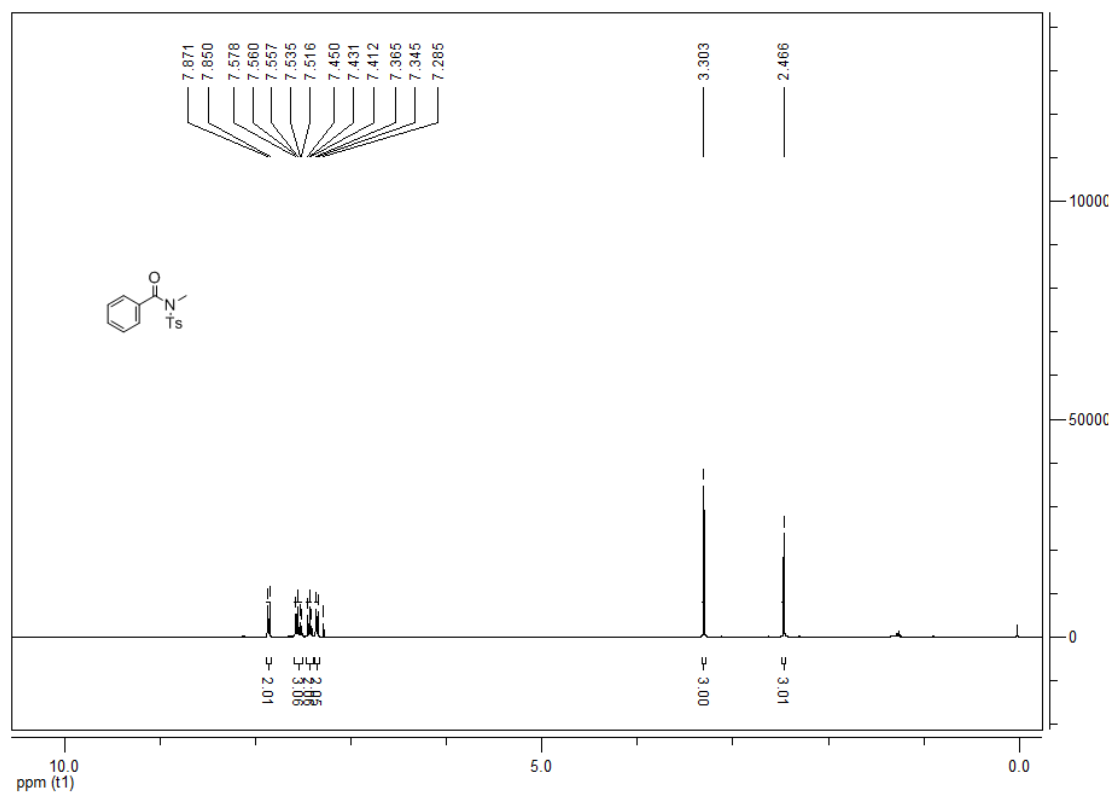

## <sup>13</sup>C NMR

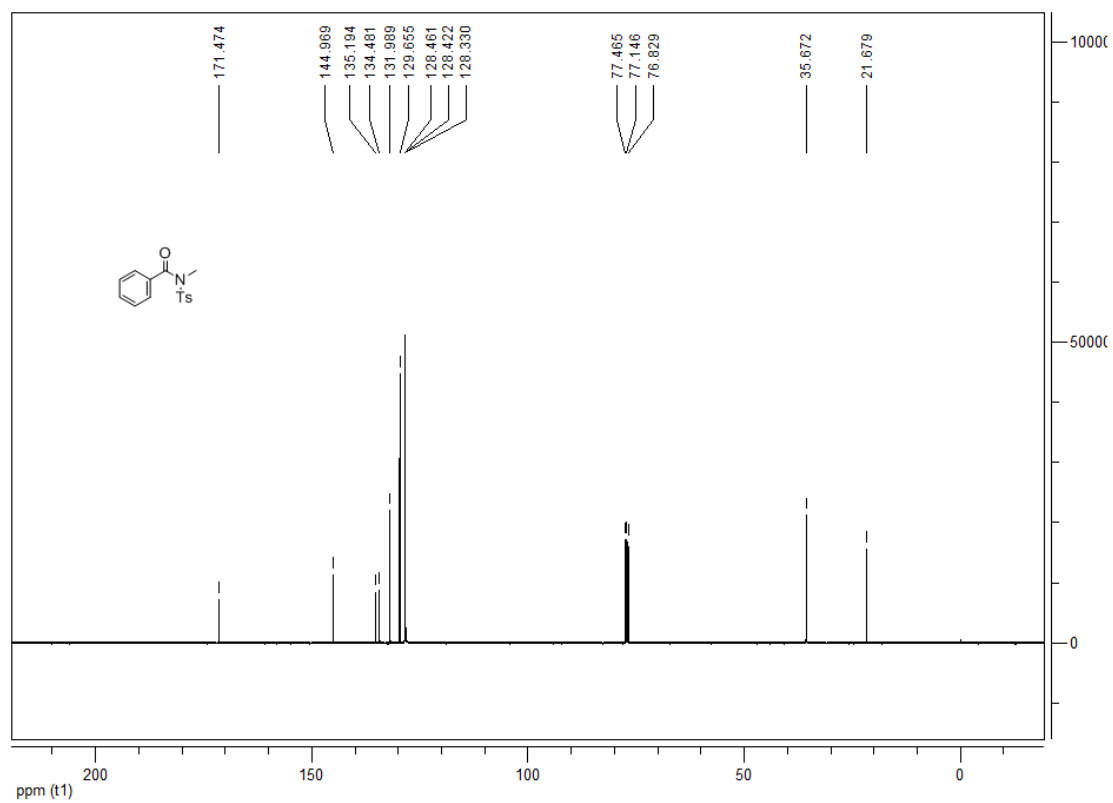

# N-phenyl-N-tosylbenzamide 1d

## $^1\text{H NMR}$

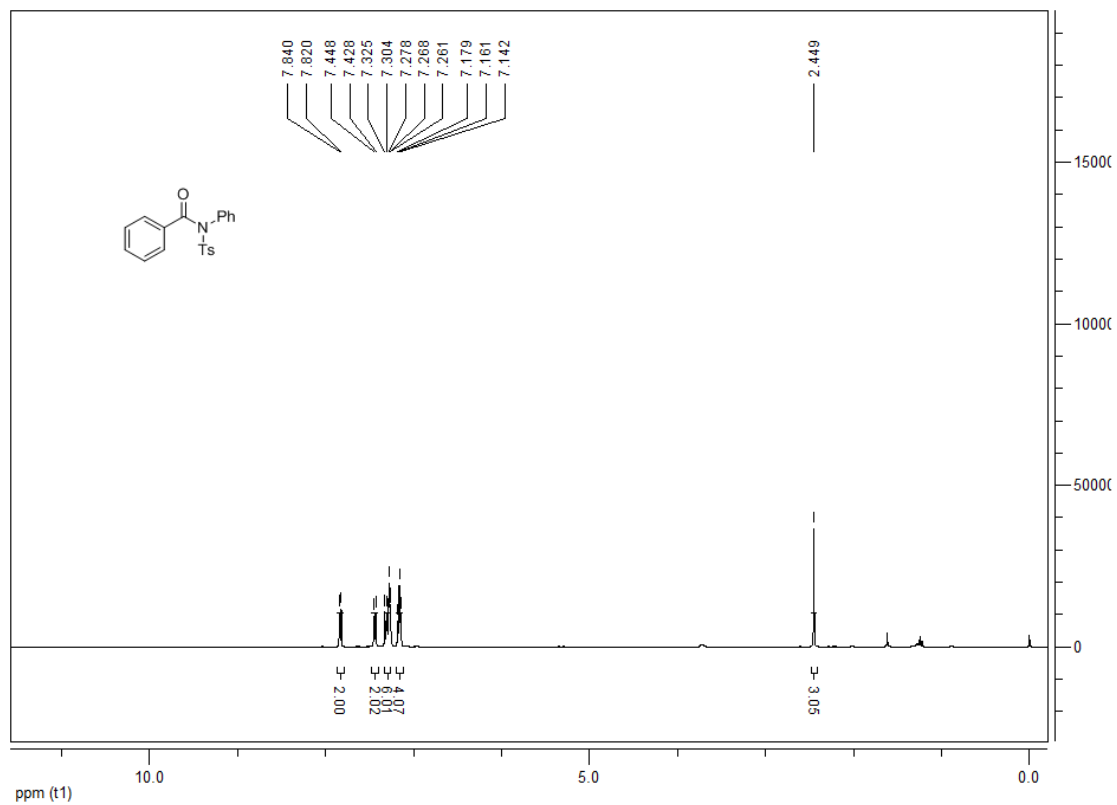

## $^{13}\text{C NMR}$

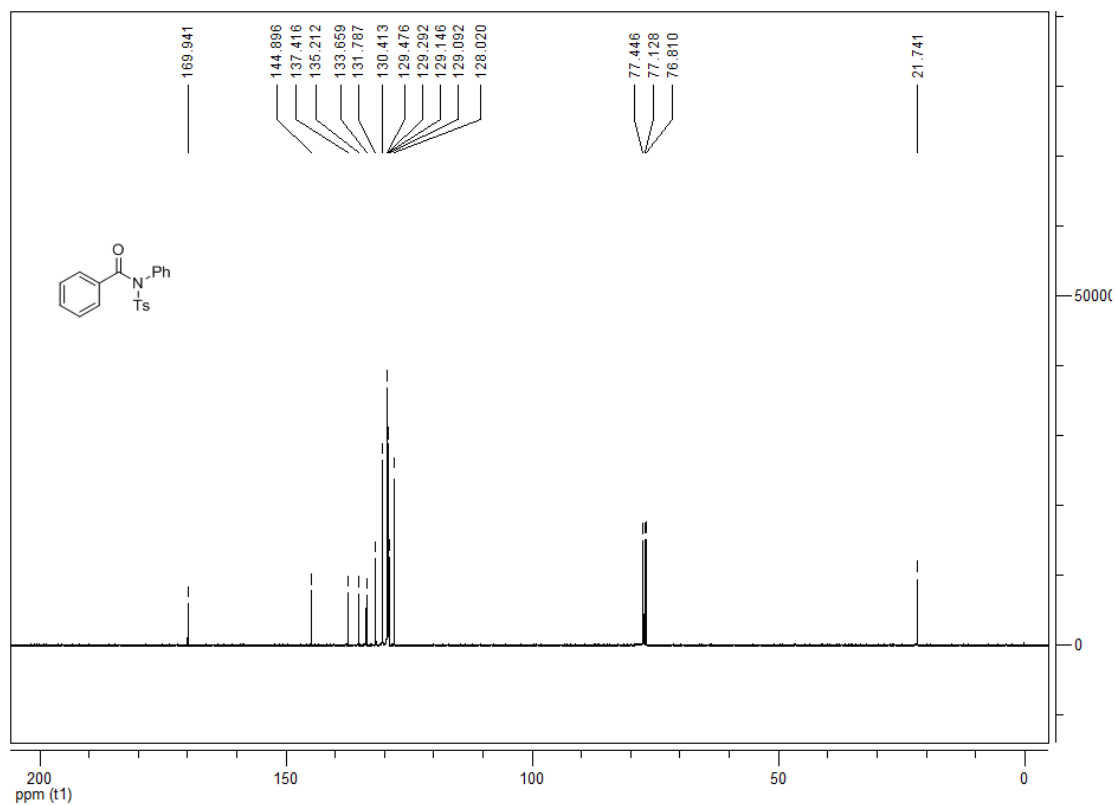

# 4-fluoro-N-phenyl-N-tosylbenzamide 1e

## <sup>1</sup>H NMR

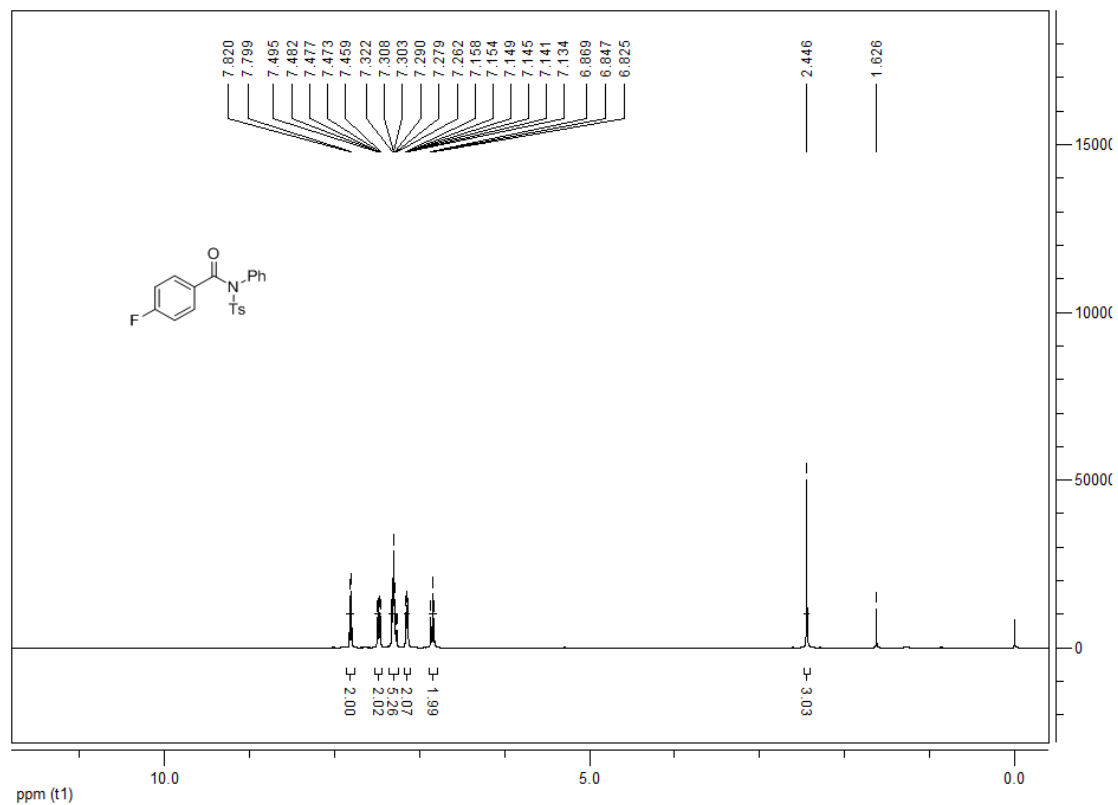

## <sup>13</sup>C NMR

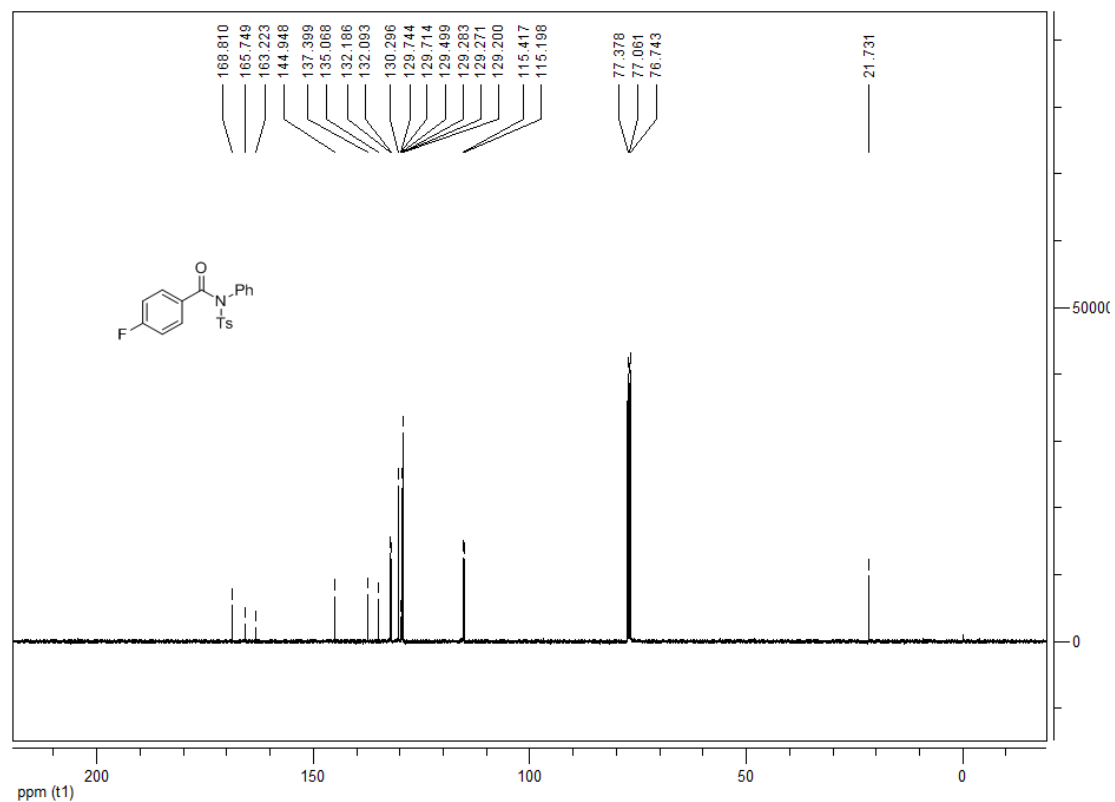



# methyl 4-(phenyl(tosyl)carbamoyl)benzoate 1g

## <sup>1</sup>H NMR

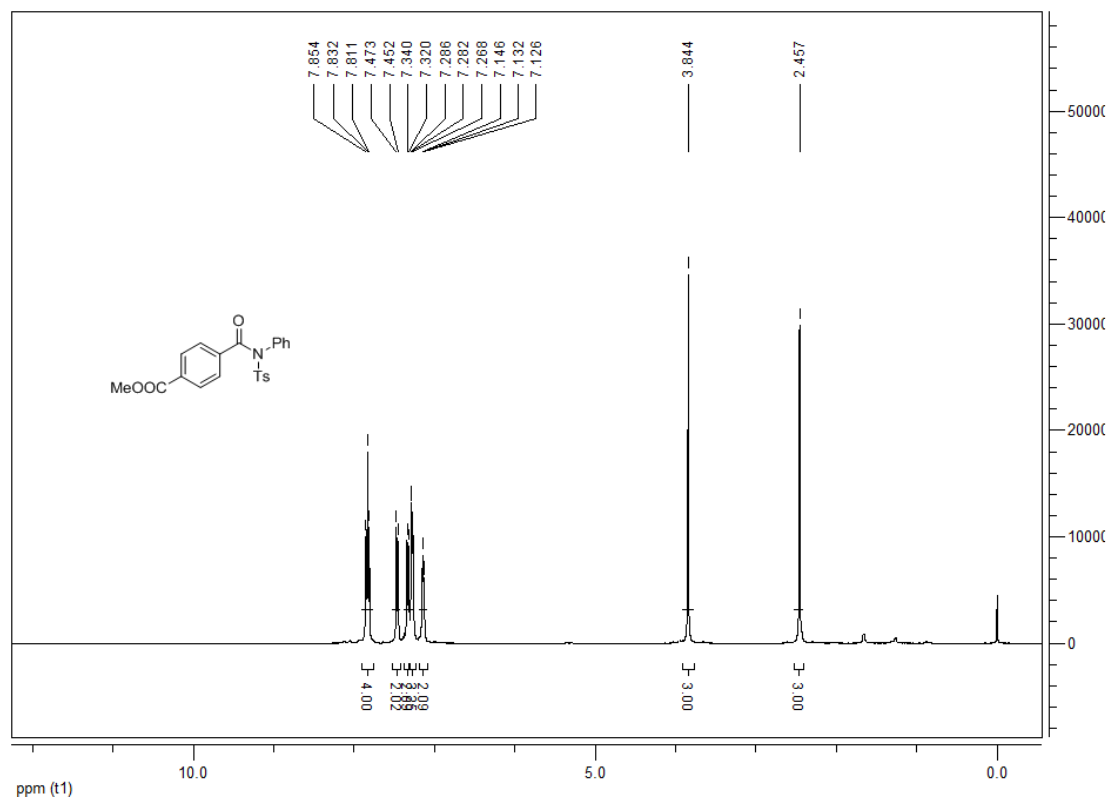

## <sup>13</sup>C NMR

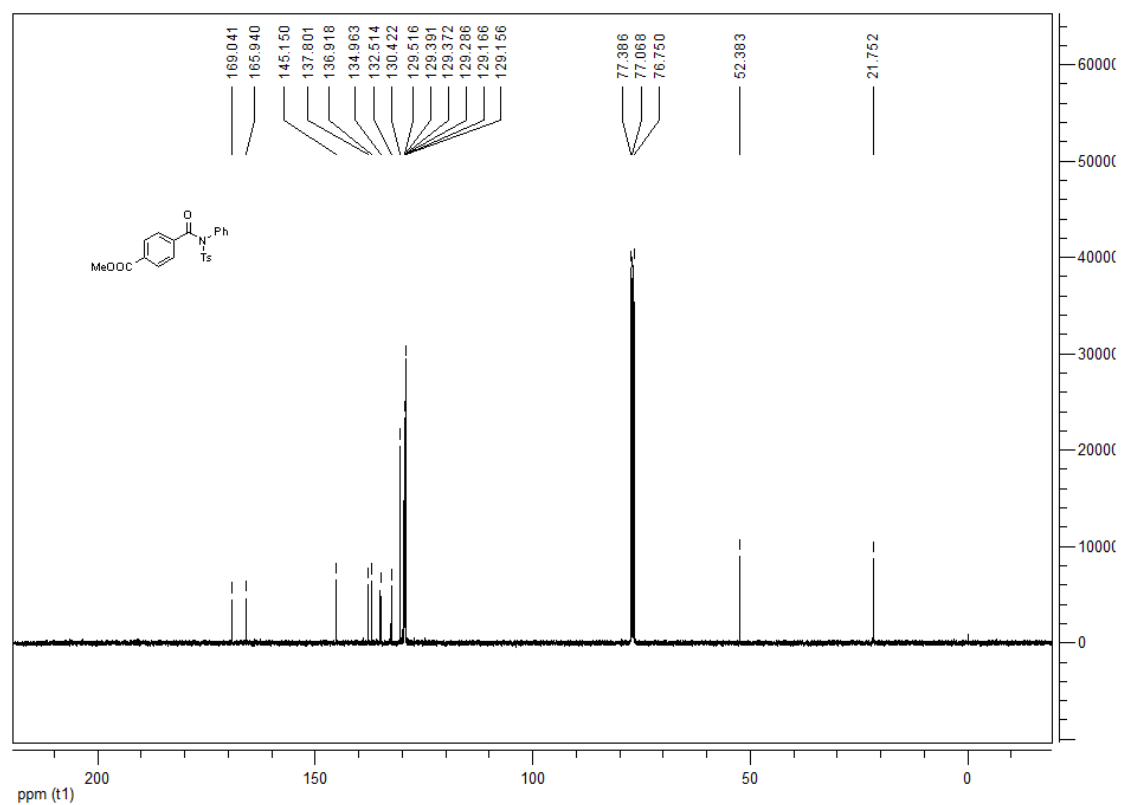

# 4-cyano-N-phenyl-N-tosylbenzamide 1h

## <sup>1</sup>H NMR

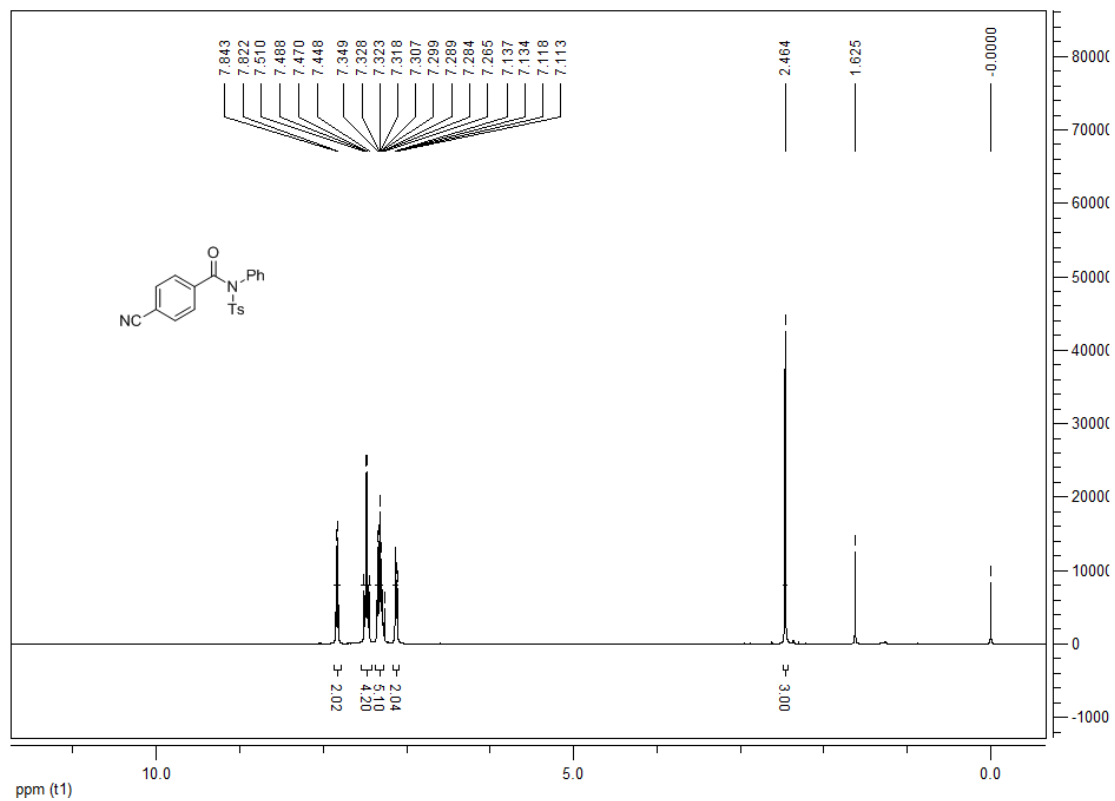

## <sup>13</sup>C NMR

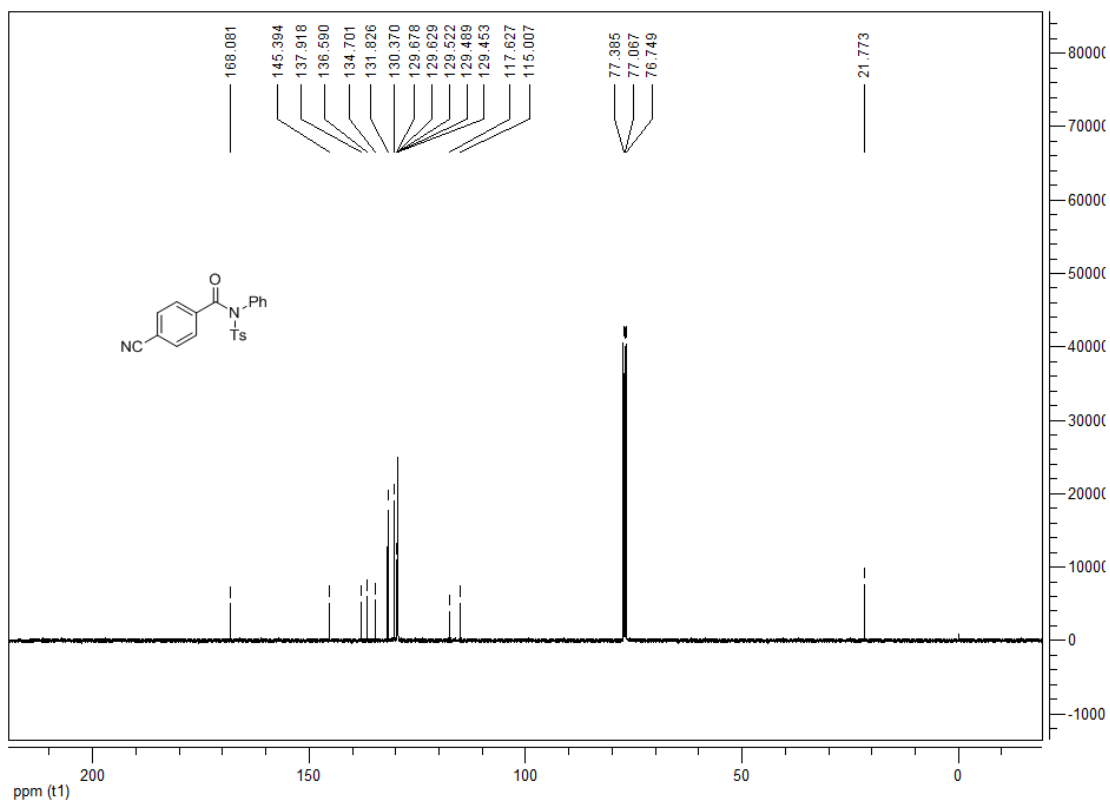



# 4-nitro-N-phenyl-N-tosylbenzamide 1i

## <sup>1</sup>H NMR

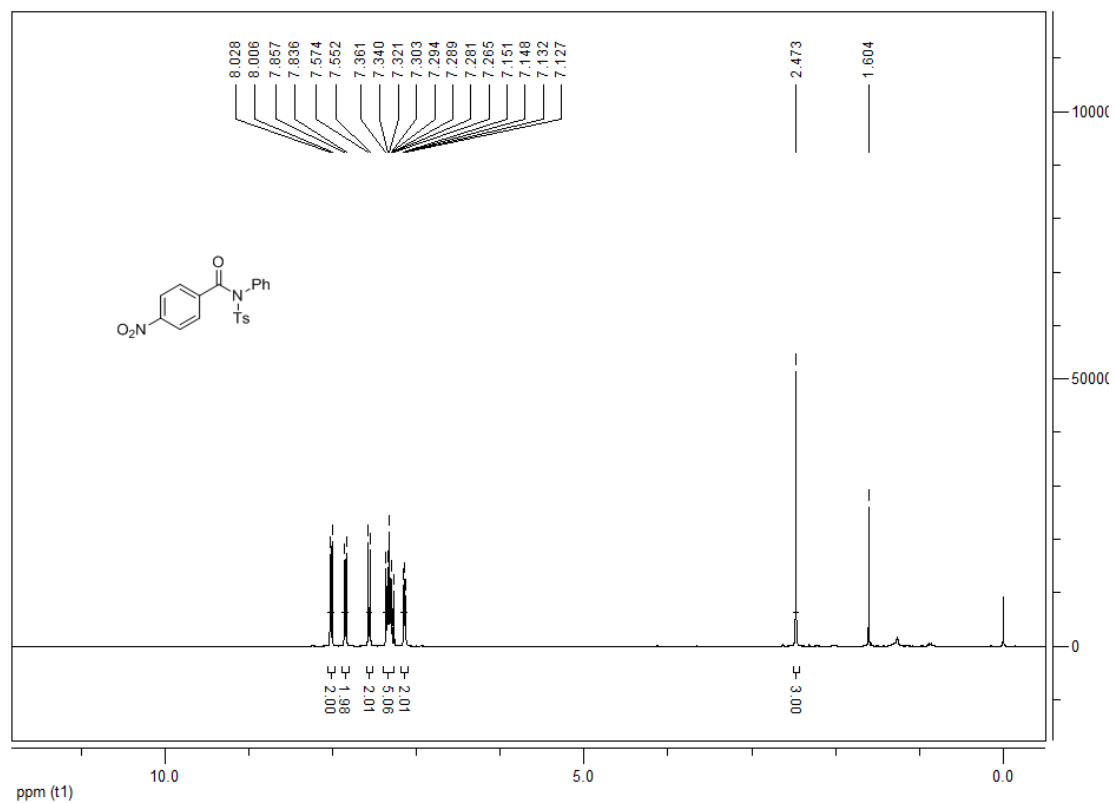

## <sup>13</sup>C NMR

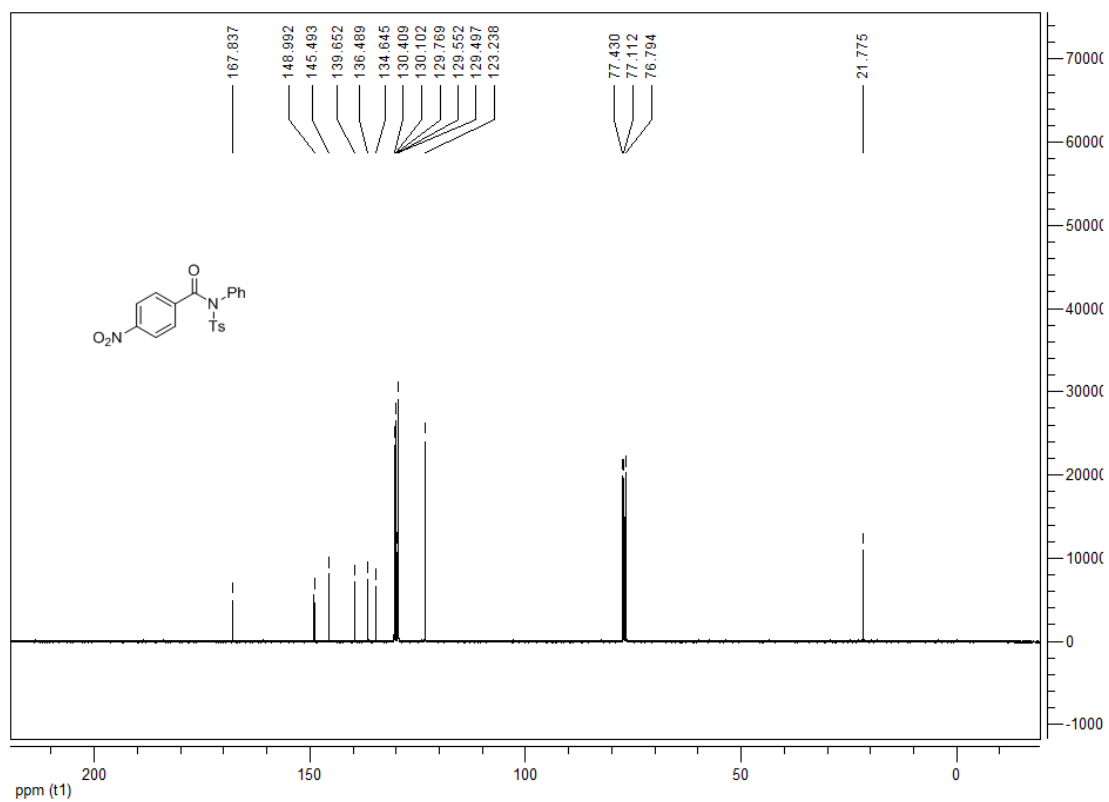

# 4-methyl-N-phenyl-N-tosylbenzamide 1j

## <sup>1</sup>H NMR

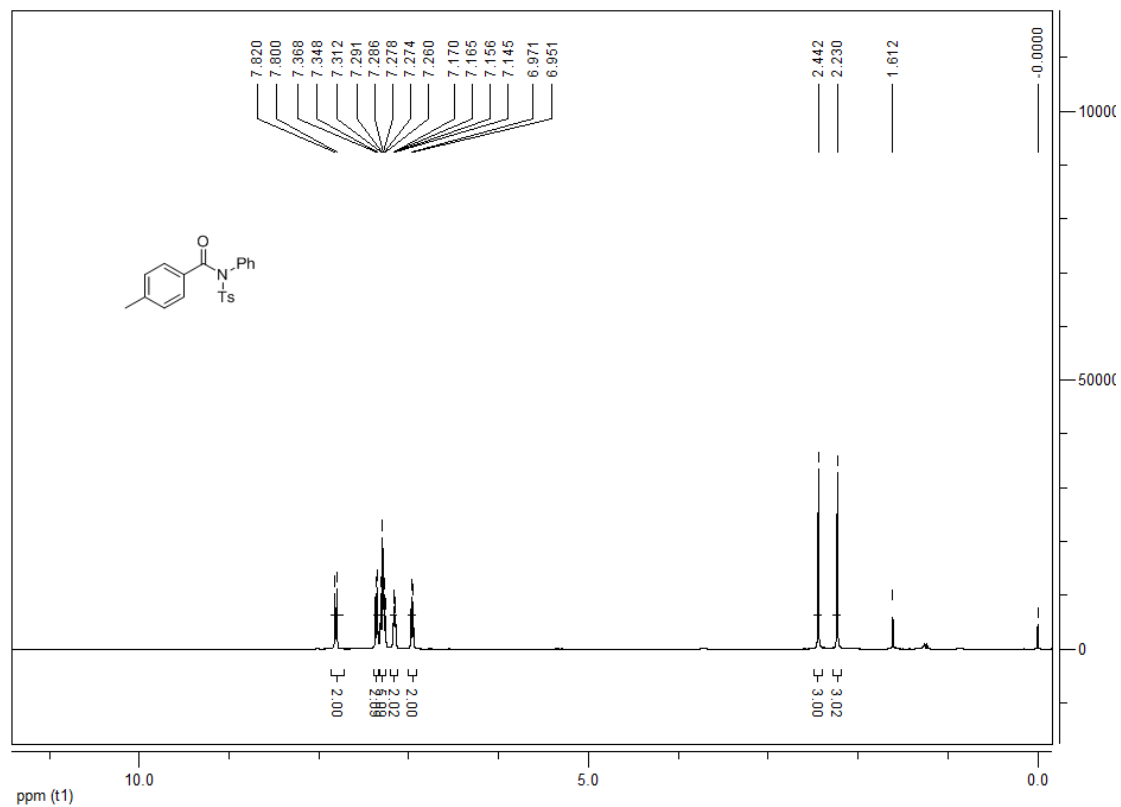

## <sup>13</sup>C NMR

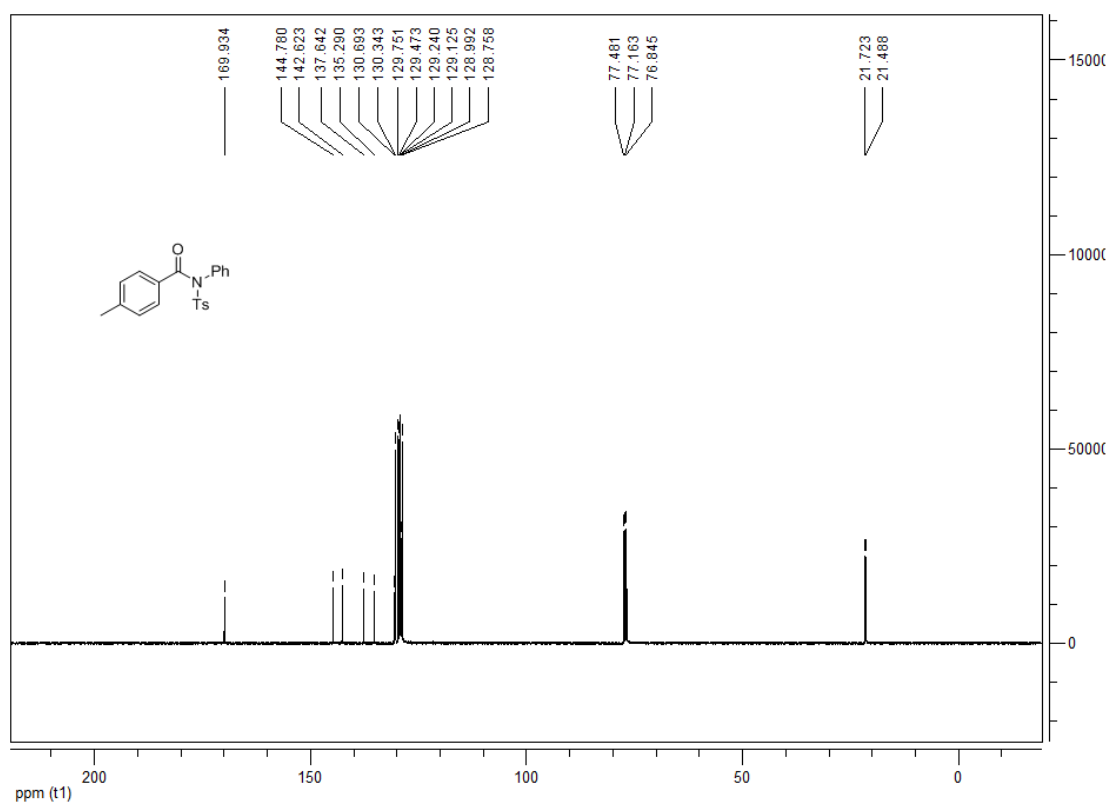

# 4-methoxy-N-phenyl-N-tosylbenzamide 1k

## <sup>1</sup>H NMR

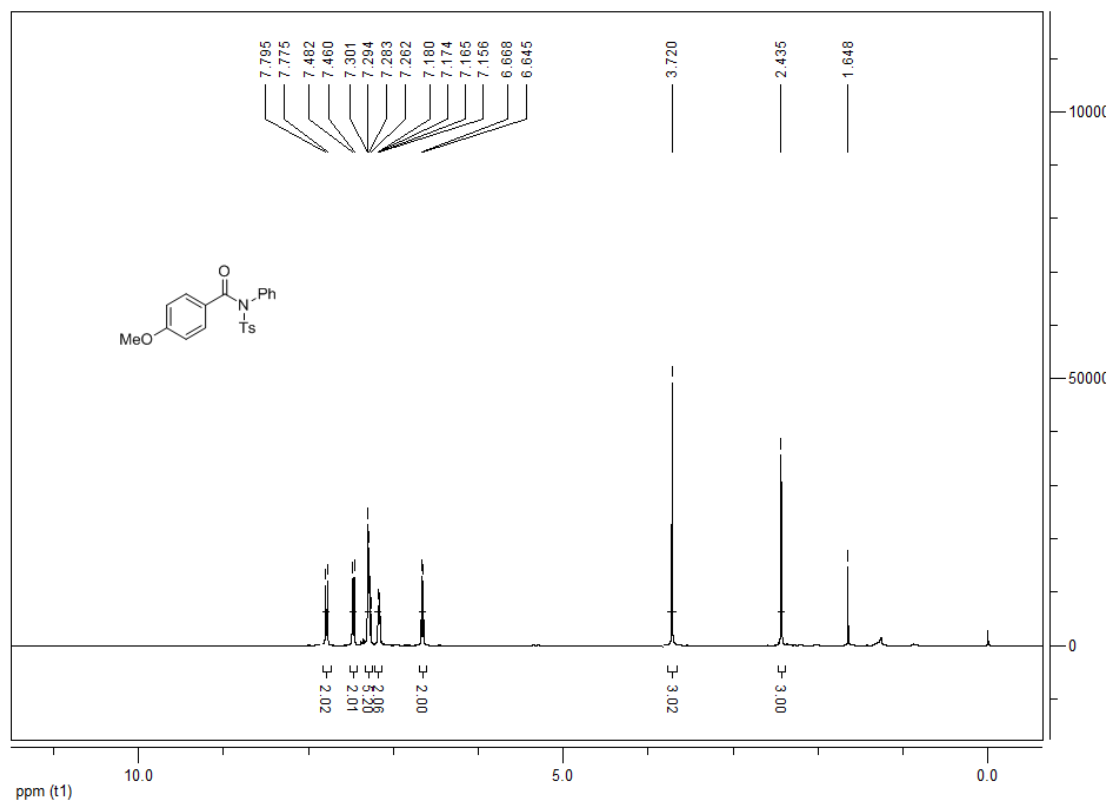

## <sup>13</sup>C NMR

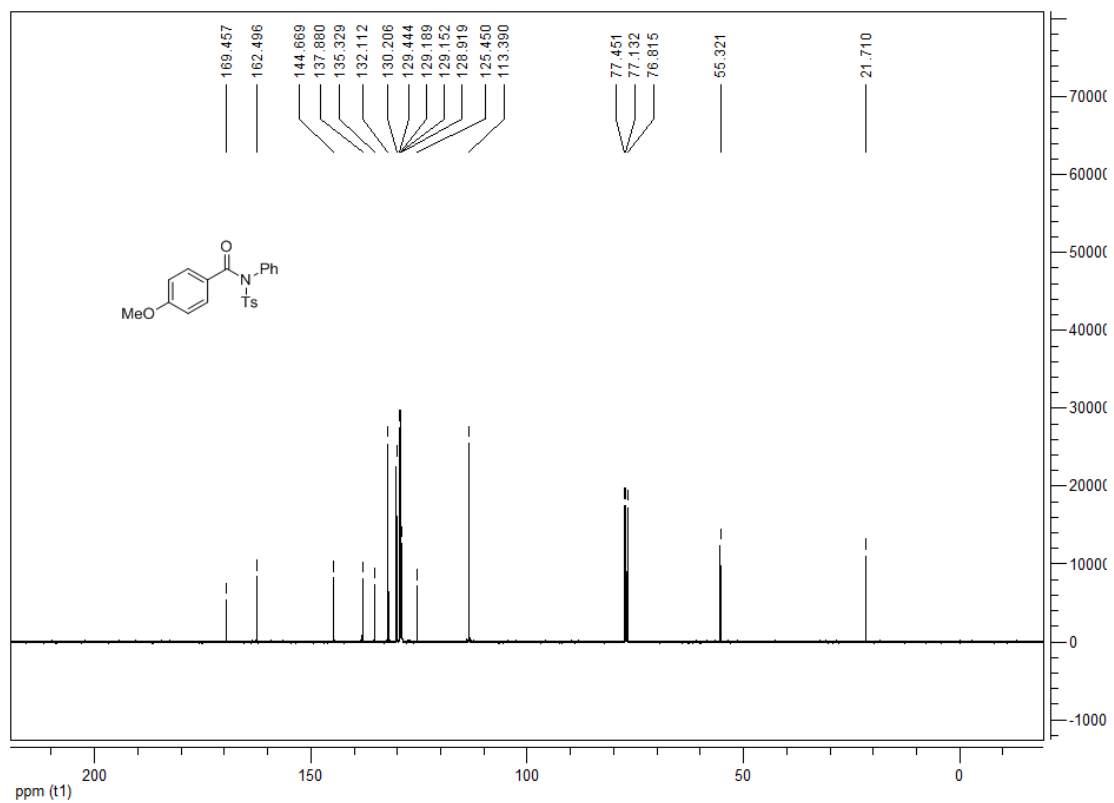

# tert-butyl (4-(phenyl(tosyl)carbamoyl)phenyl)carbamate 11

## <sup>1</sup>H NMR

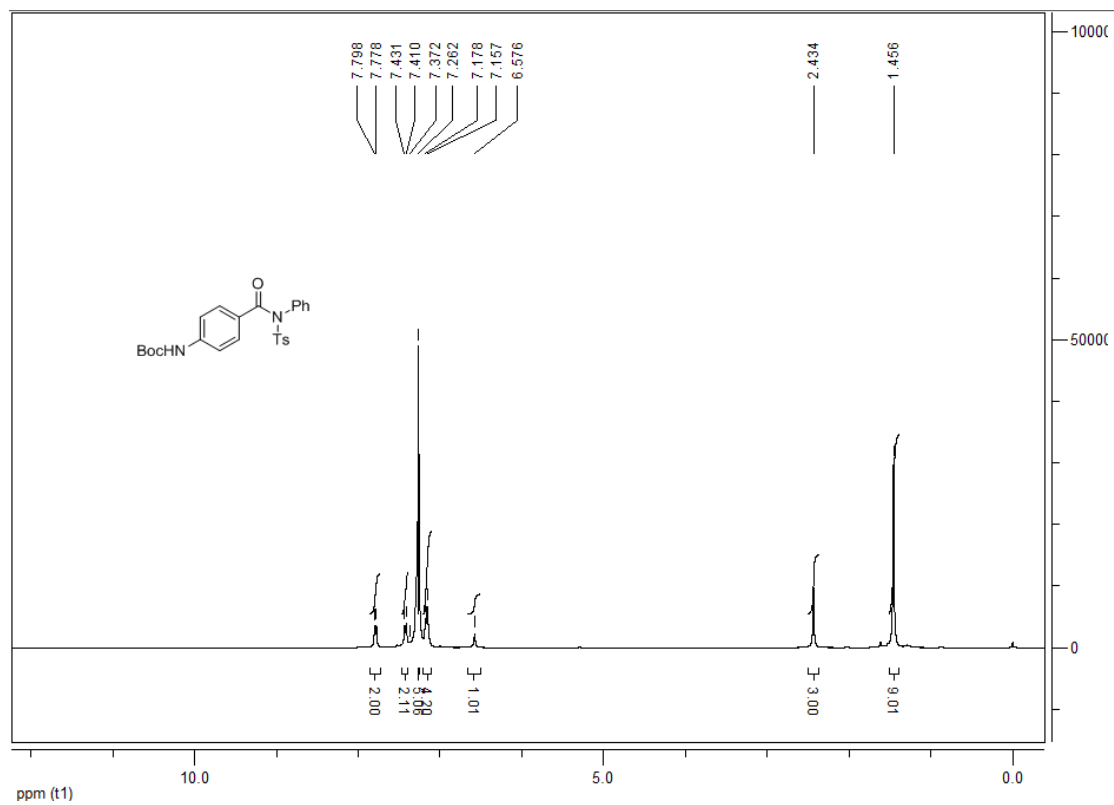

## <sup>13</sup>C NMR

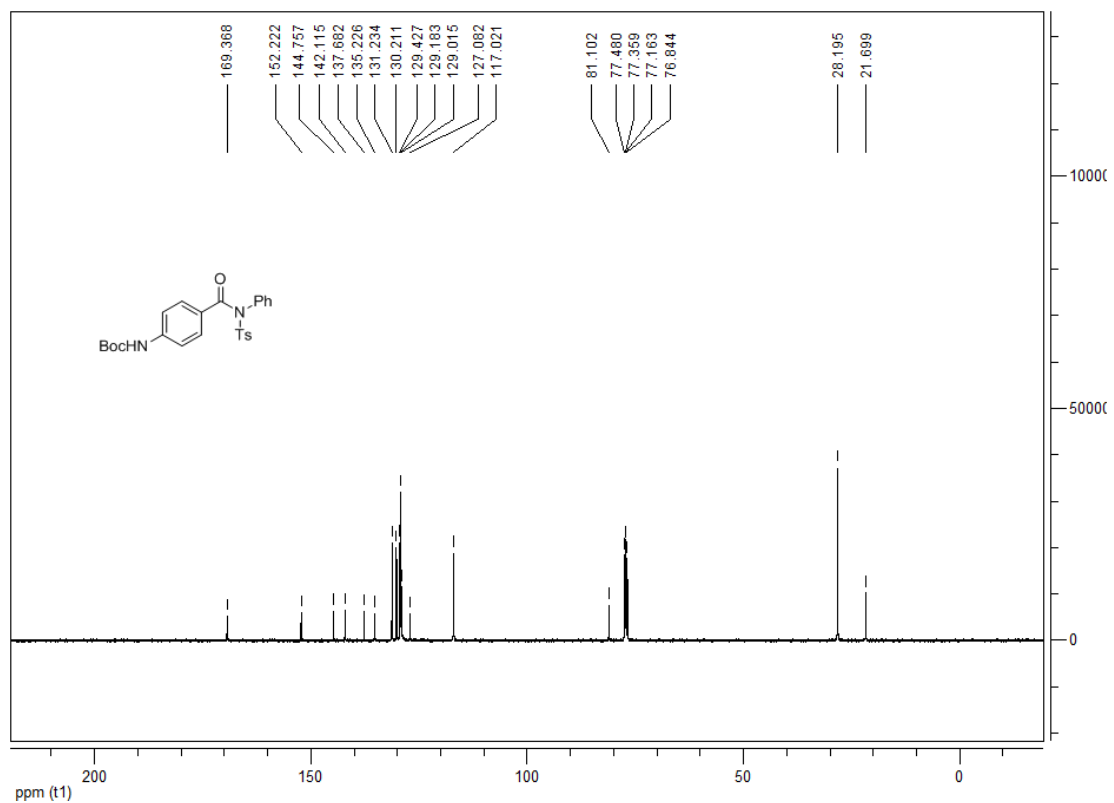

# N-phenyl-N-tosylfuran-2-carboxamide 1m

## $^1\text{H}$ NMR

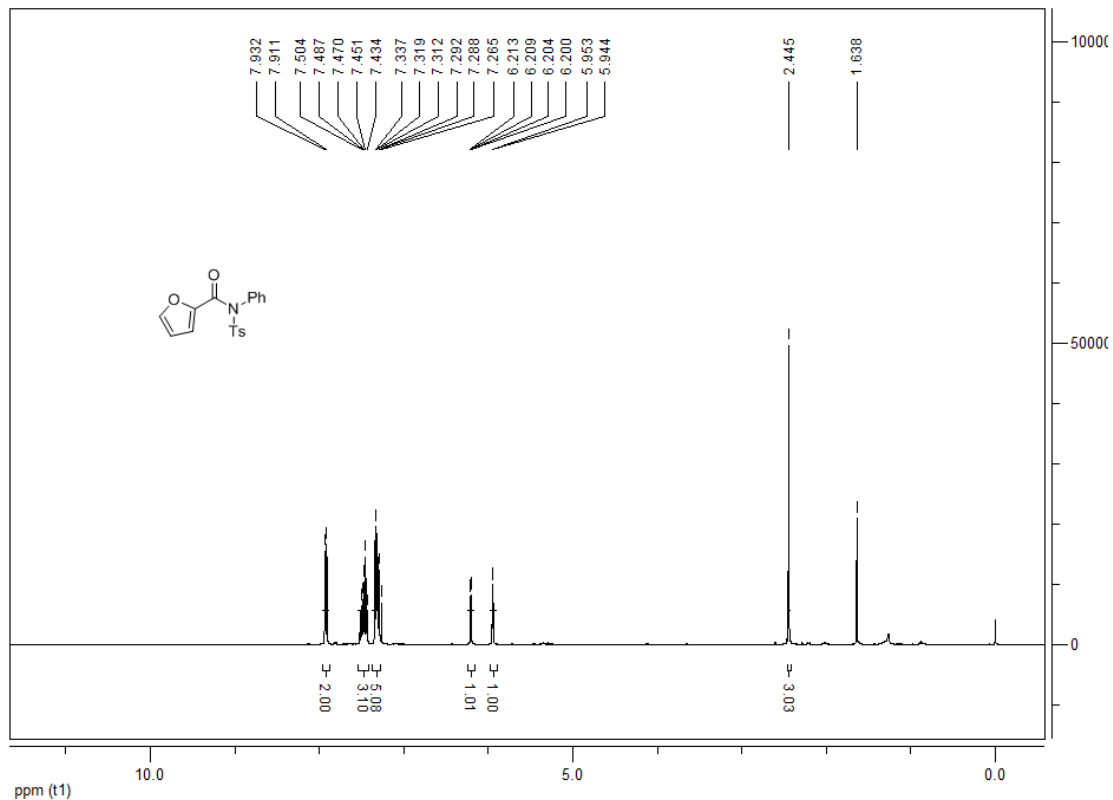

## $^{13}\text{C}$ NMR

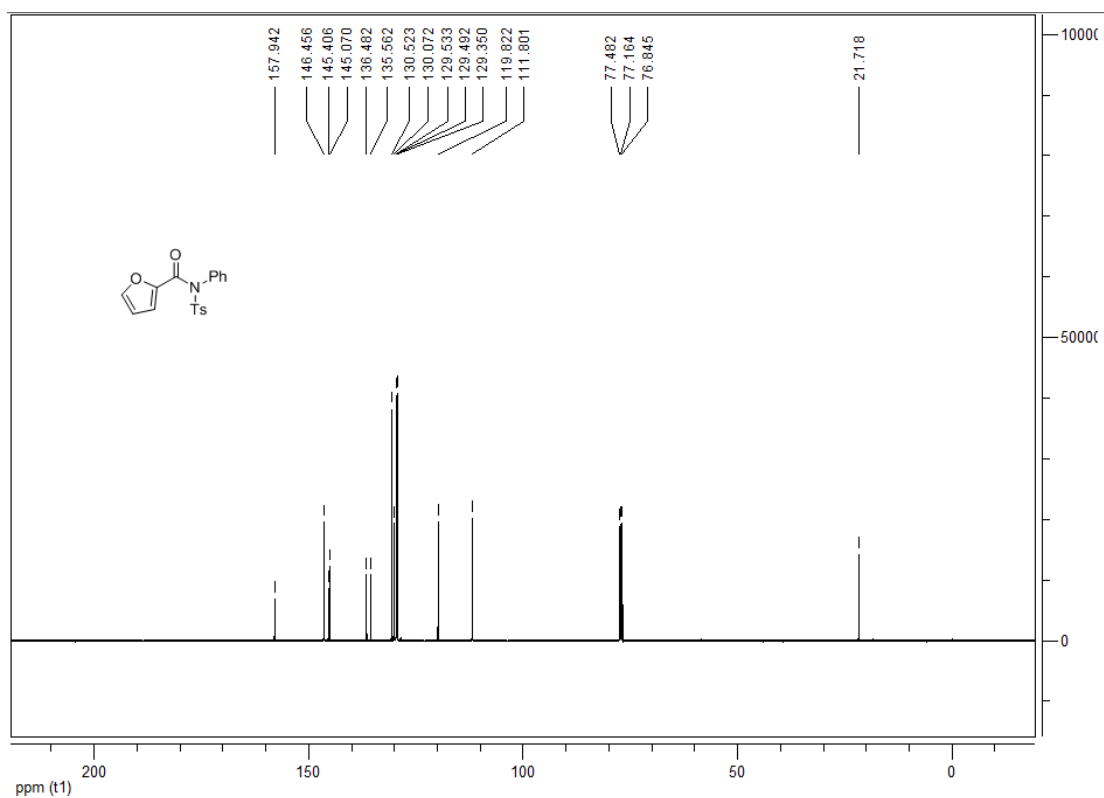

# N-phenyl-N-tosylthiophene-2-carboxamide 1n

## <sup>1</sup>H NMR

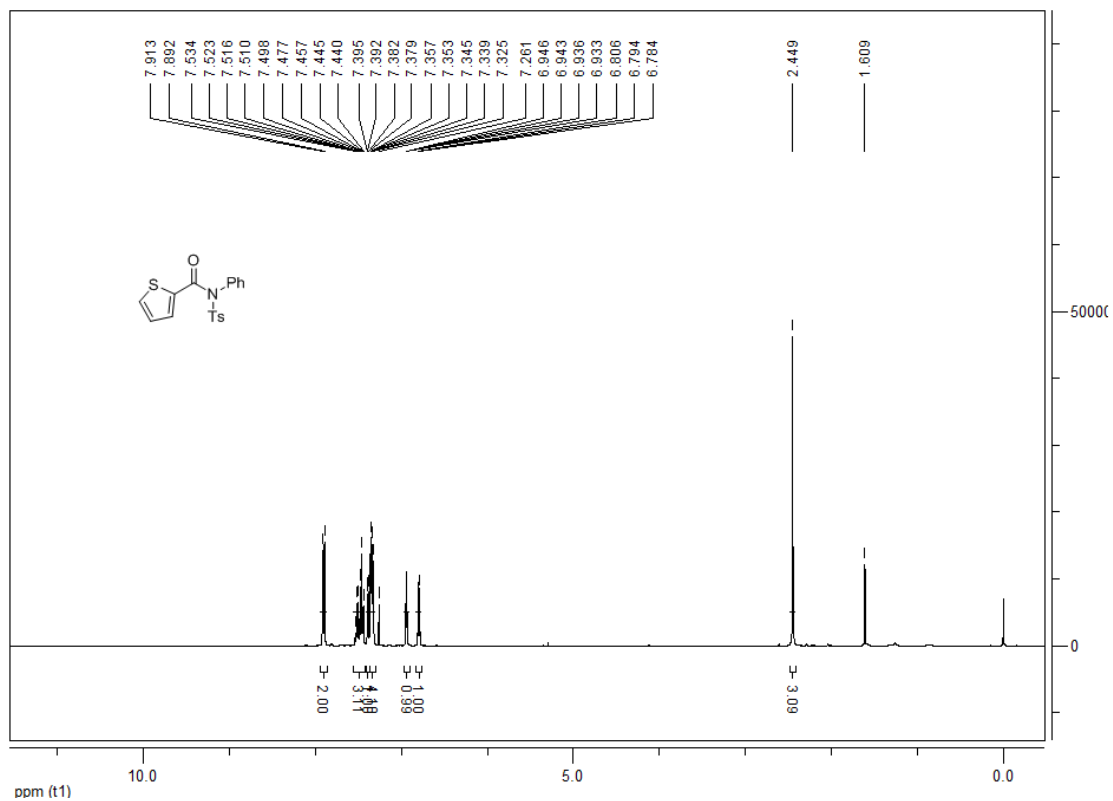

## <sup>13</sup>C NMR

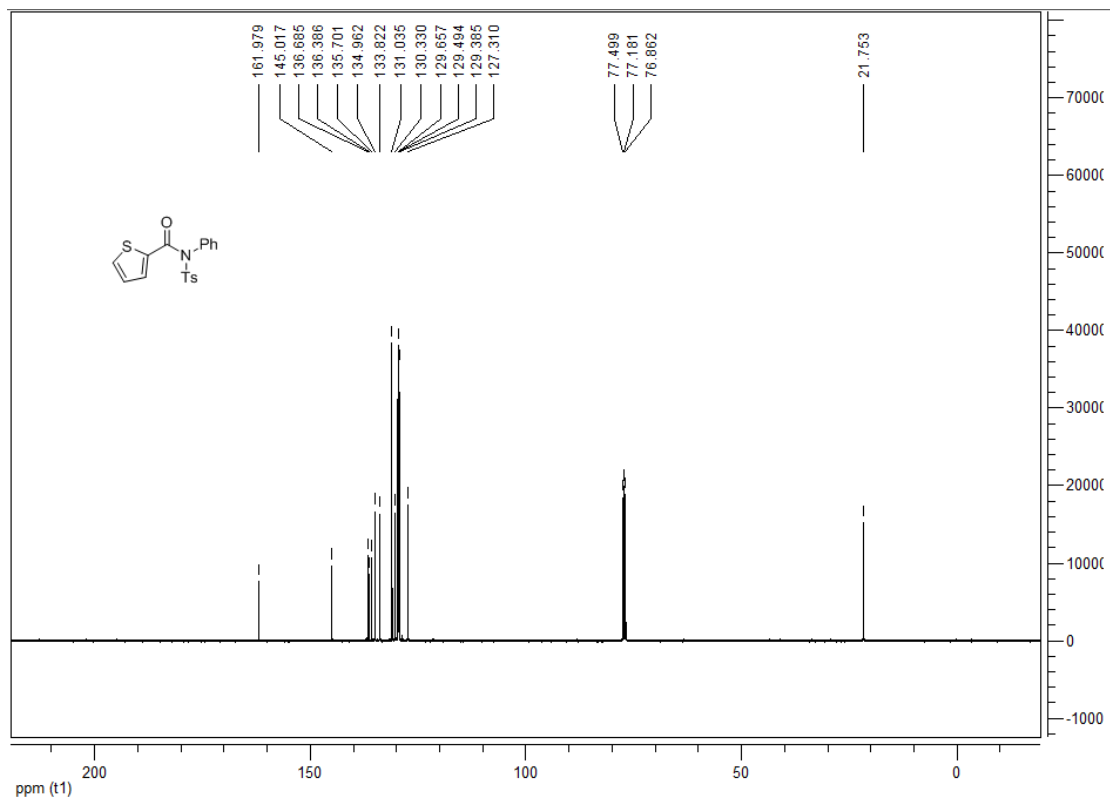

# N-phenyl-N-tosylcinnamamide 1o

## <sup>1</sup>H NMR

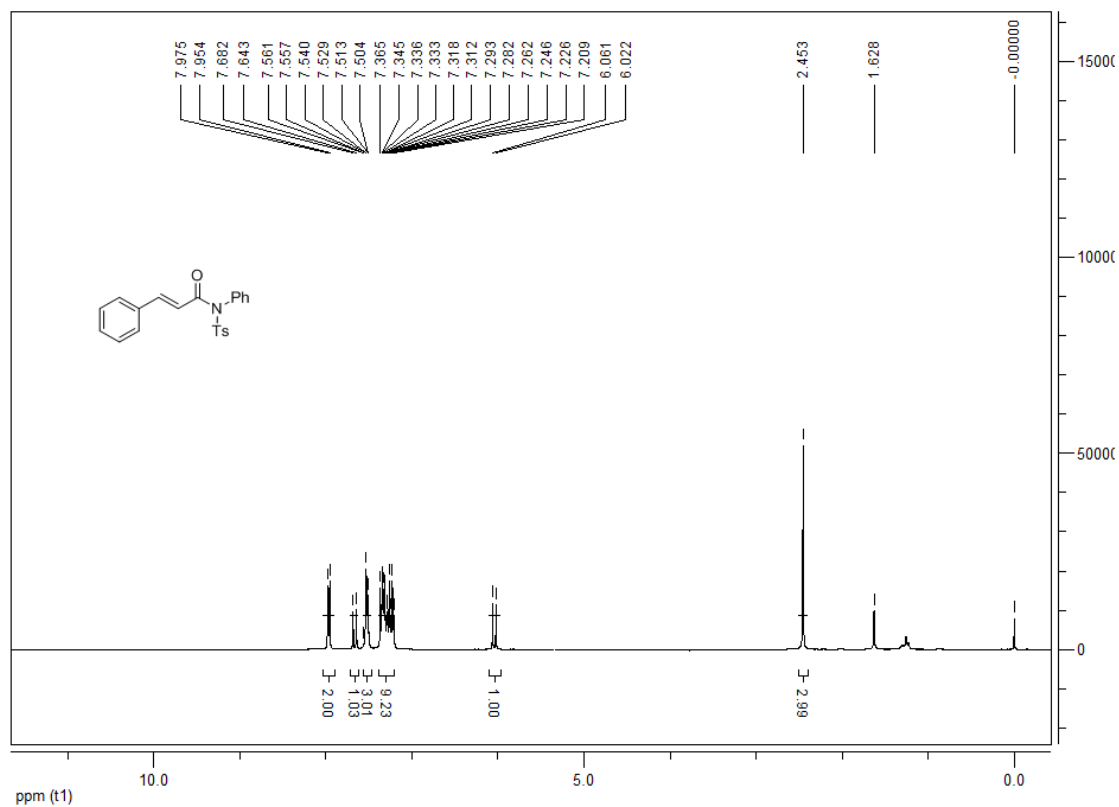

## <sup>13</sup>C NMR

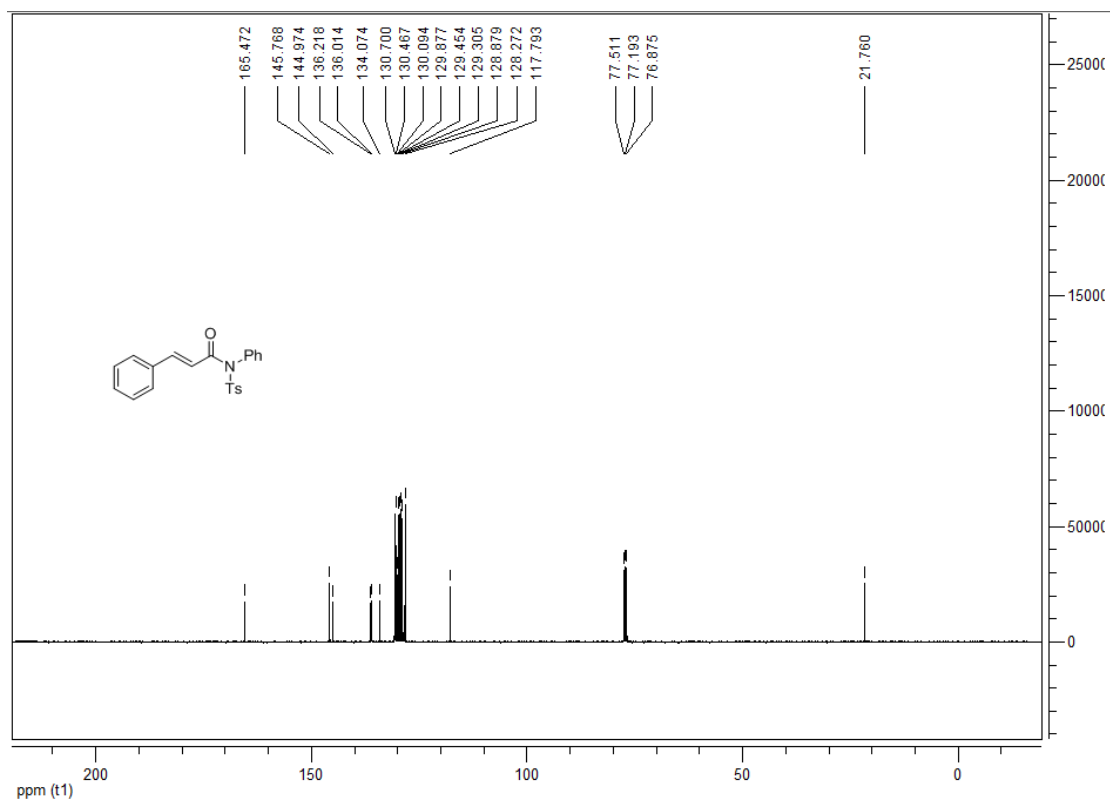

# N,3-diphenyl-N-tosylpropanamide 1p

## <sup>1</sup>H NMR

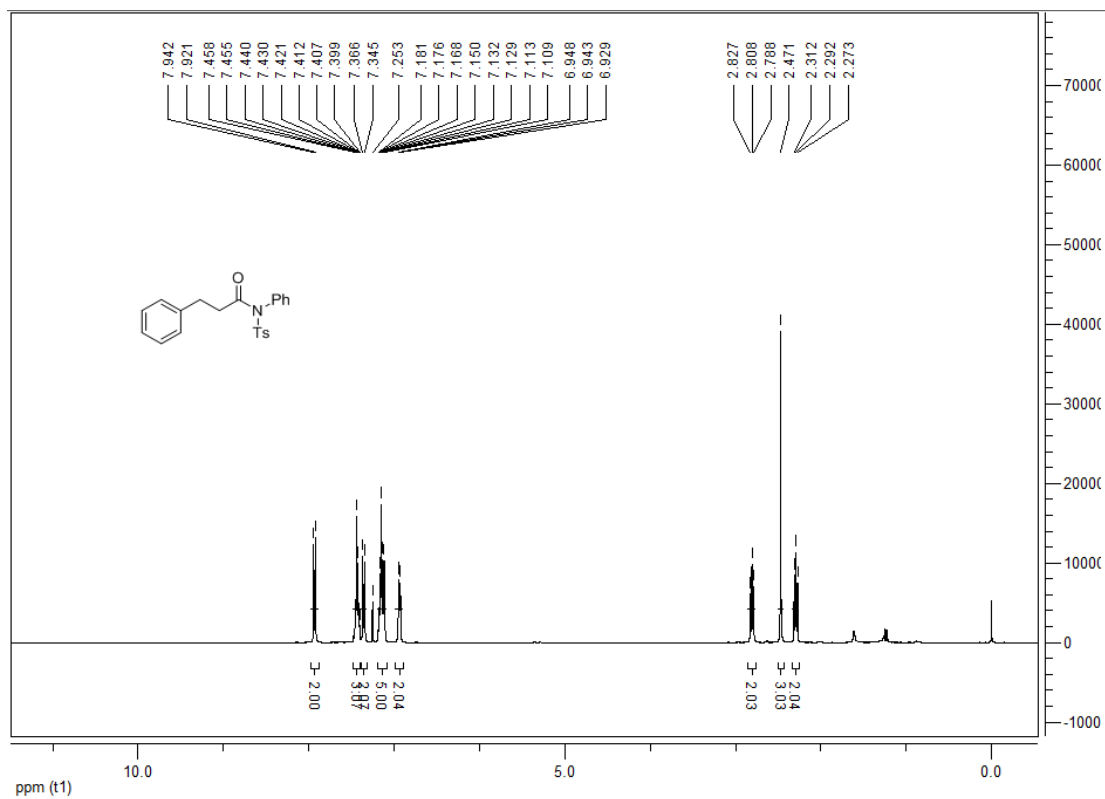

## <sup>13</sup>C NMR

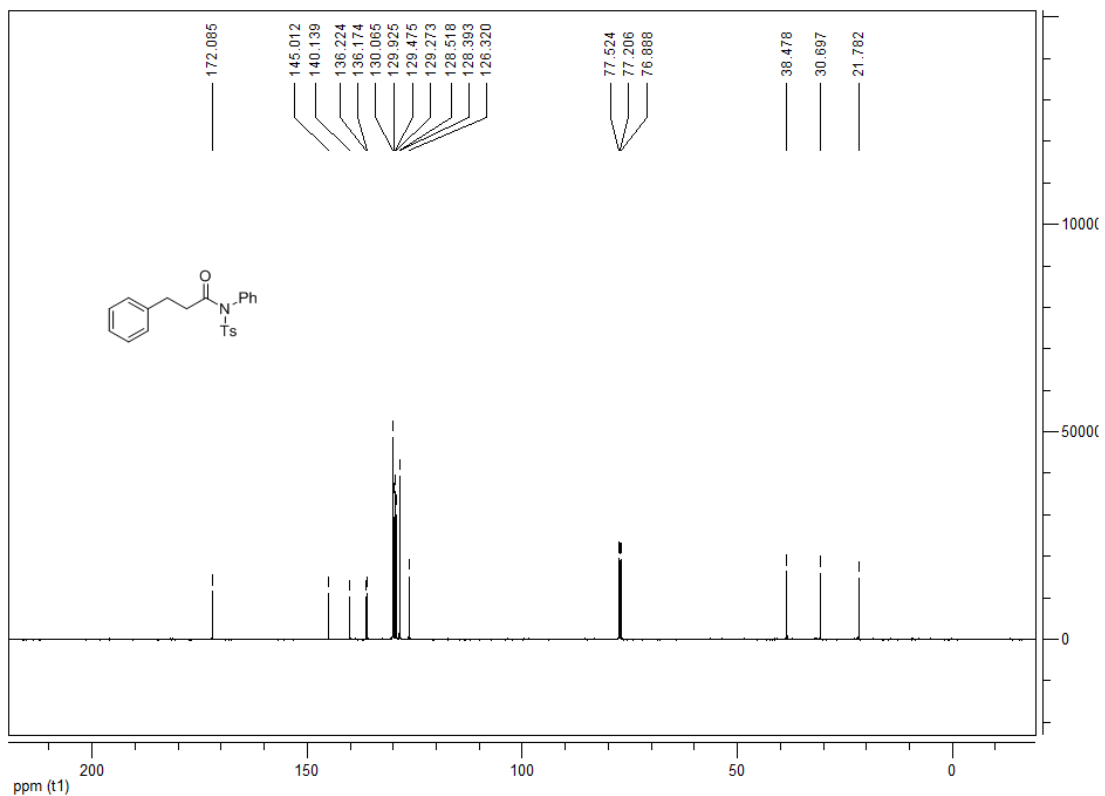



# N-phenyl-N-tosylstearamide 1q

## <sup>1</sup>H NMR

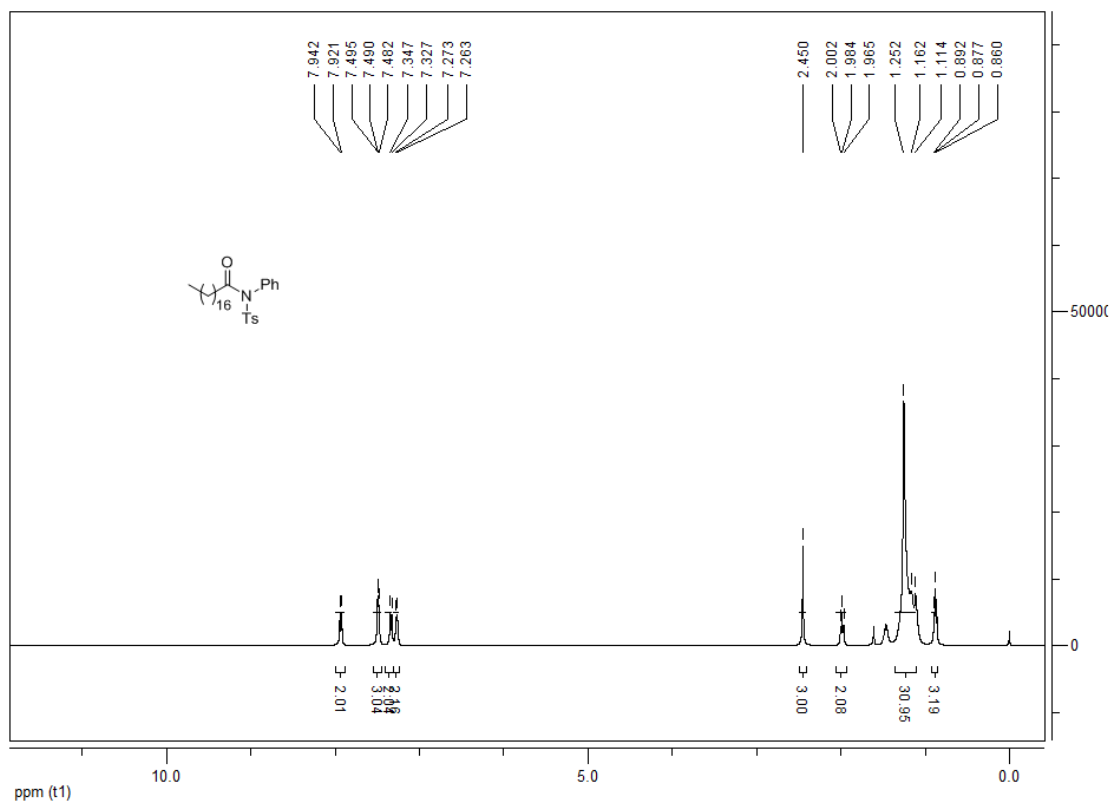

## <sup>13</sup>C NMR

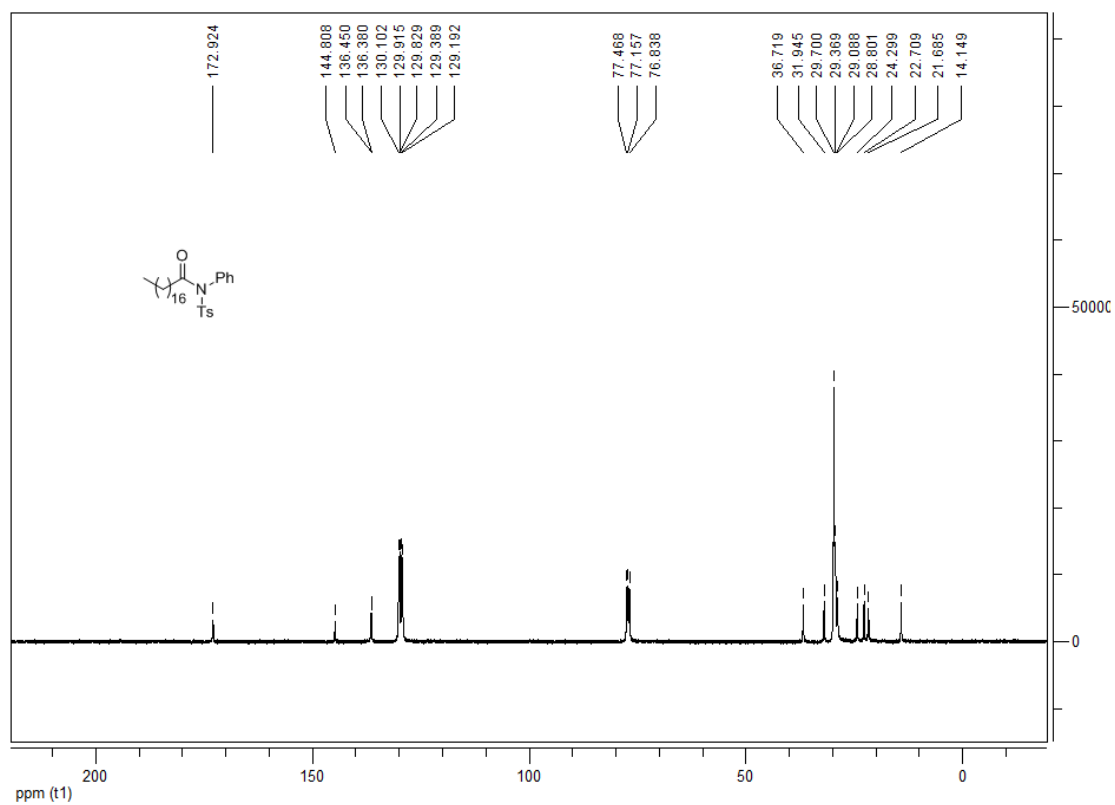

# N-phenyl-N-tosylcyclohexanecarboxamide 1r

## <sup>1</sup>H NMR

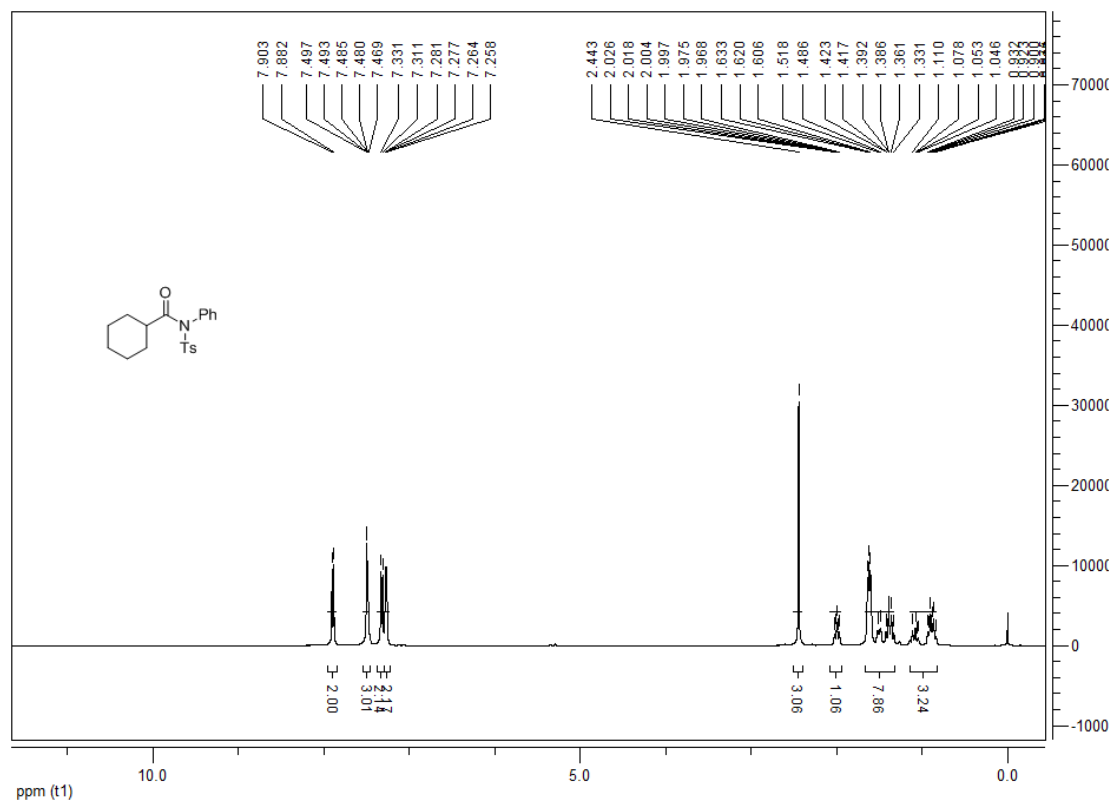

## <sup>13</sup>C NMR

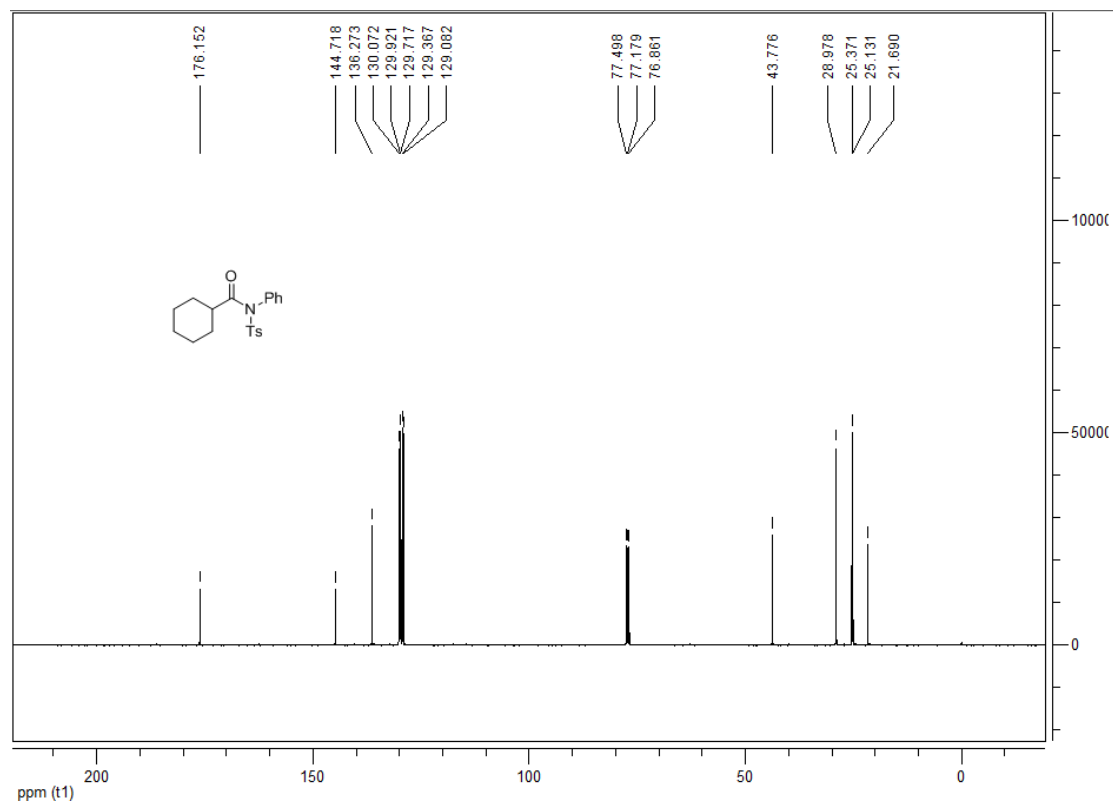

# (3*r*,5*r*,7*r*)-*N*-phenyl-*N*-tosyladamantane-1-carboxamide 1s

## <sup>1</sup>H NMR

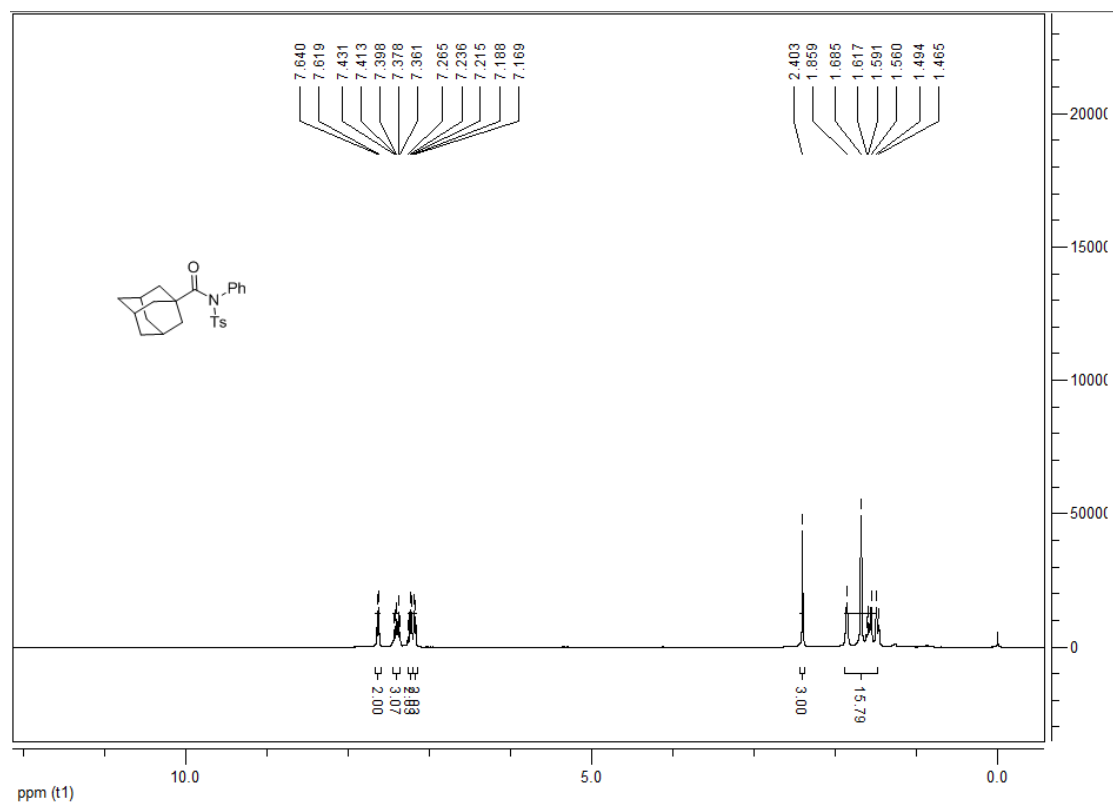

## <sup>13</sup>C NMR

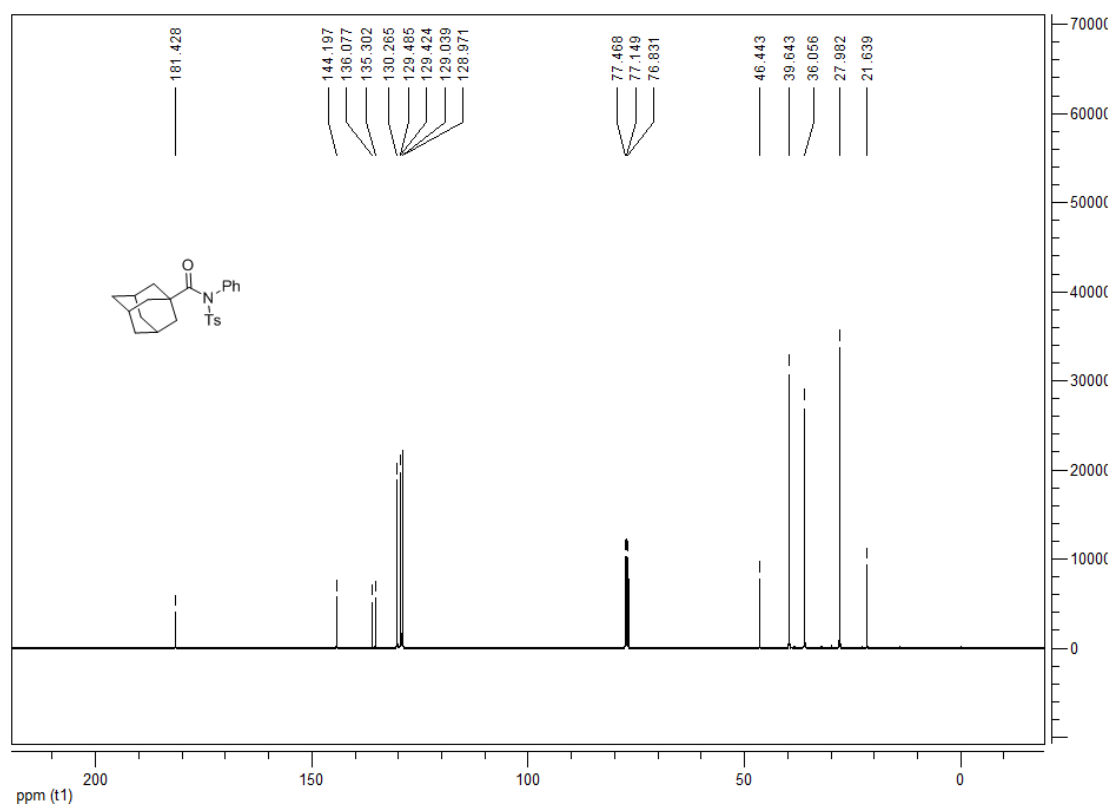

## 2-methyl-N-phenyl-N-tosylbenzamide 1t

### <sup>1</sup>H NMR

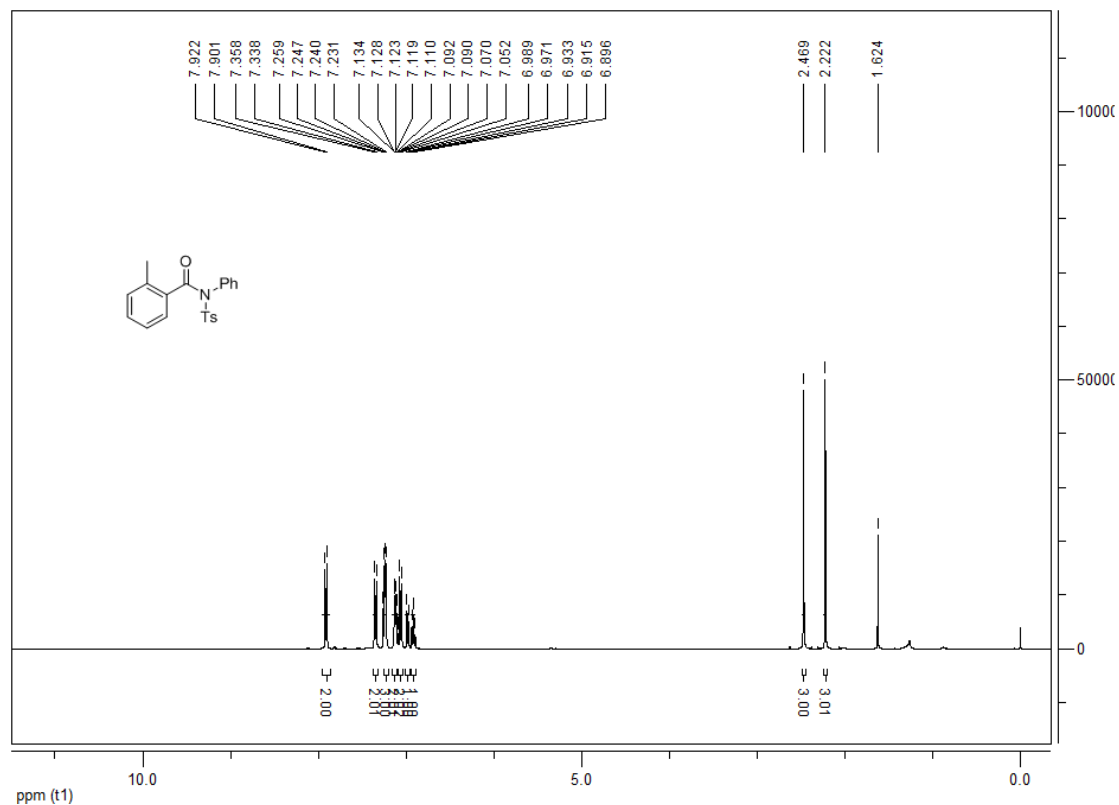

### <sup>13</sup>C NMR

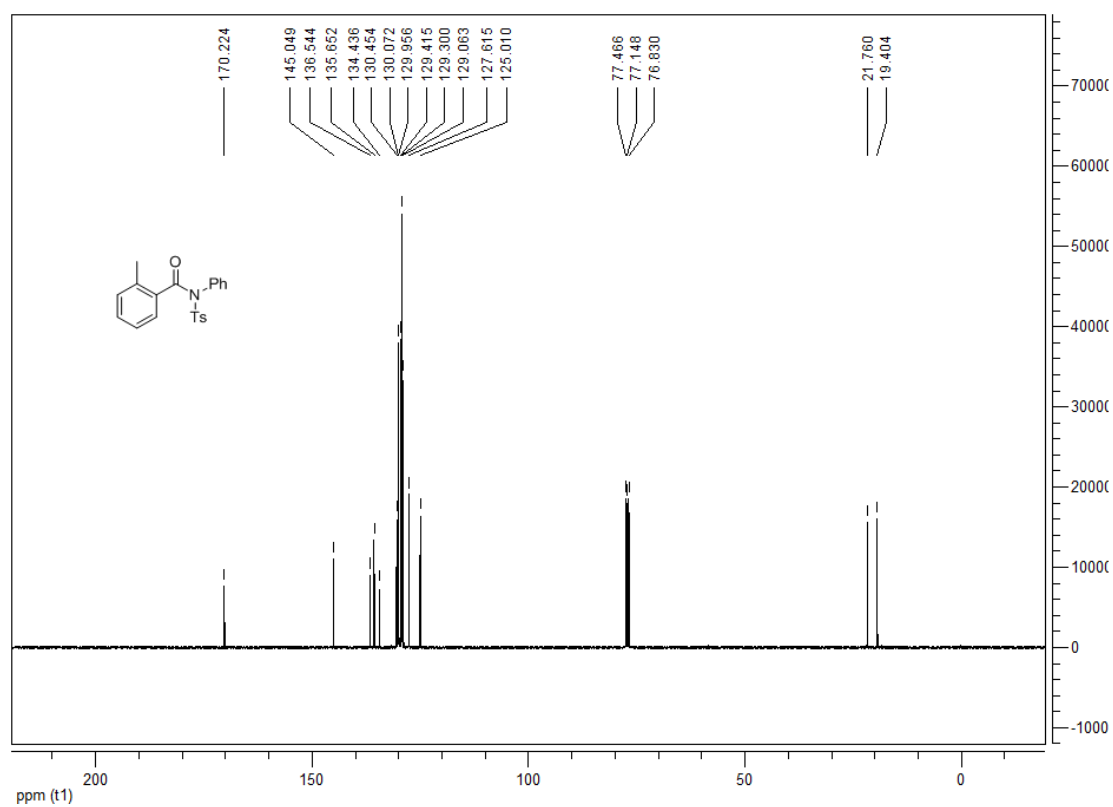

# (3r,5r,7r)-N-(3,5-bis(trifluoromethyl)phenyl)-N-tosyladamantane-1-carboxamide

1u

<sup>1</sup>H NMR

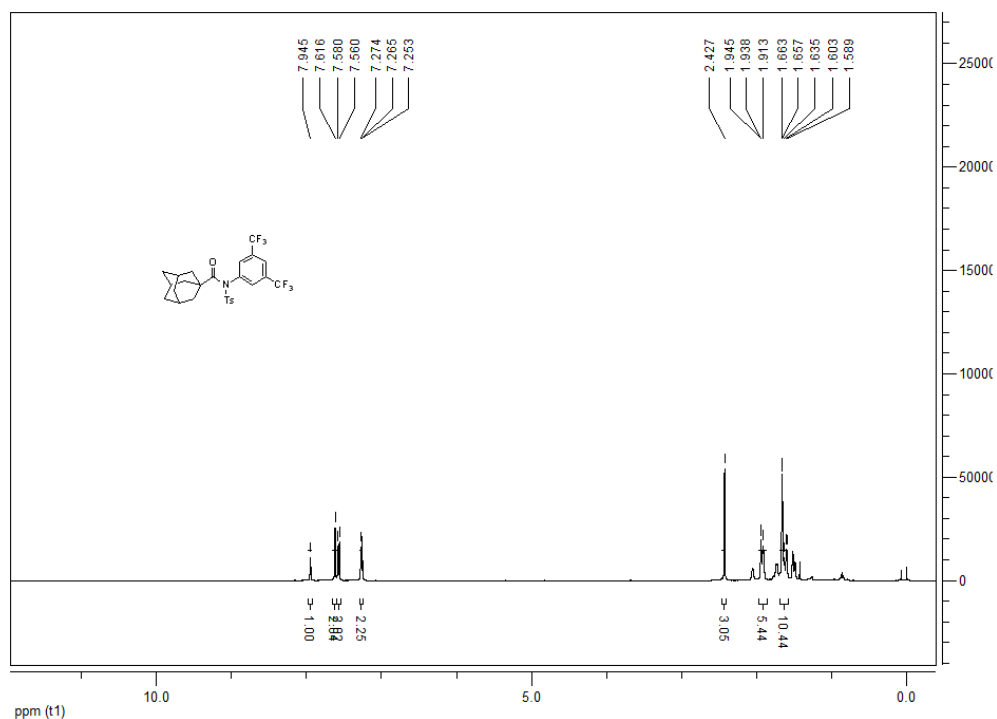

<sup>13</sup>C NMR

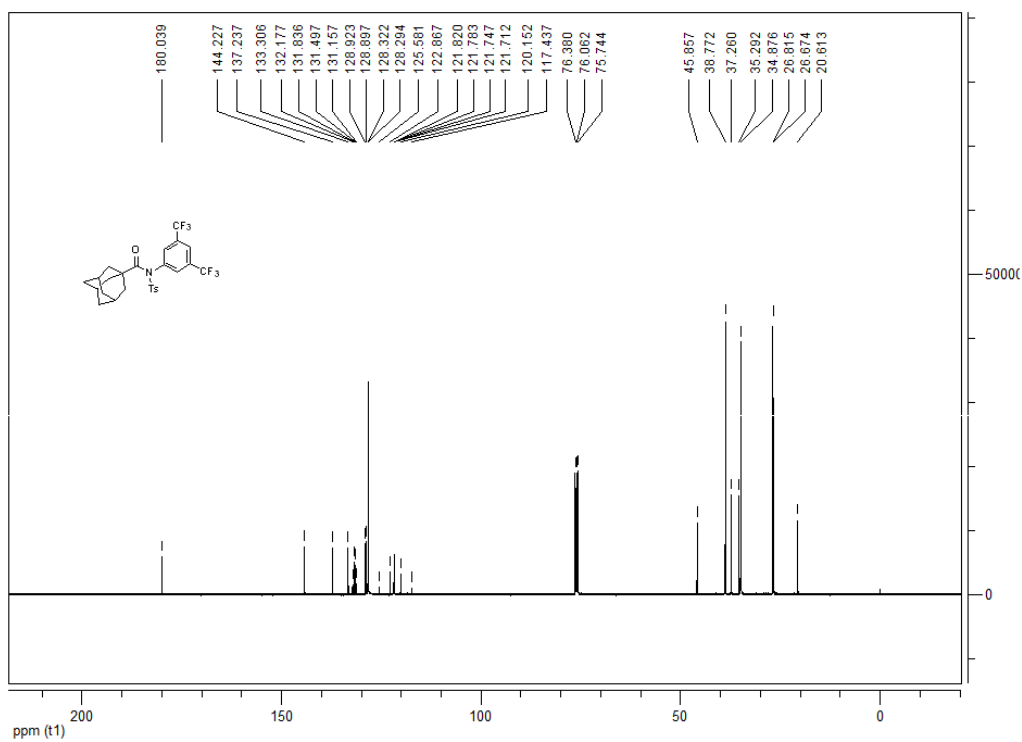

# N-(3,5-bis(trifluoromethyl)phenyl)-2-methyl-N-tosylbenzamide 1v

## <sup>1</sup>H NMR

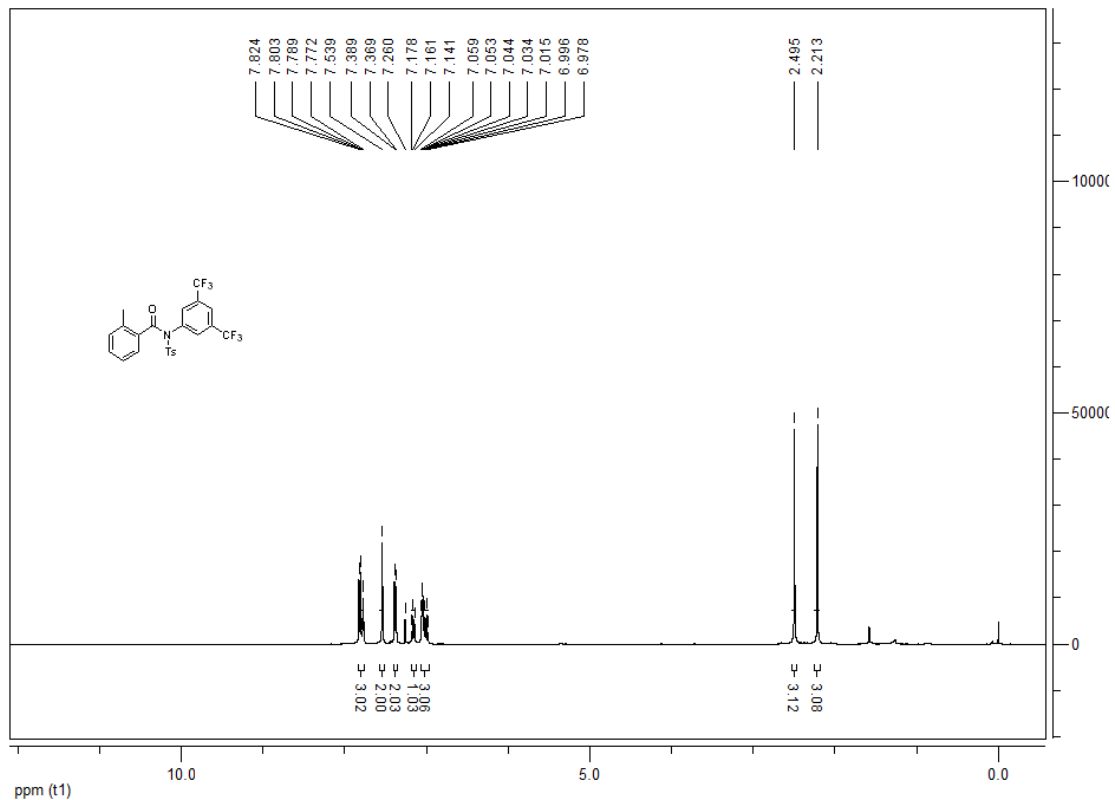

## <sup>13</sup>C NMR

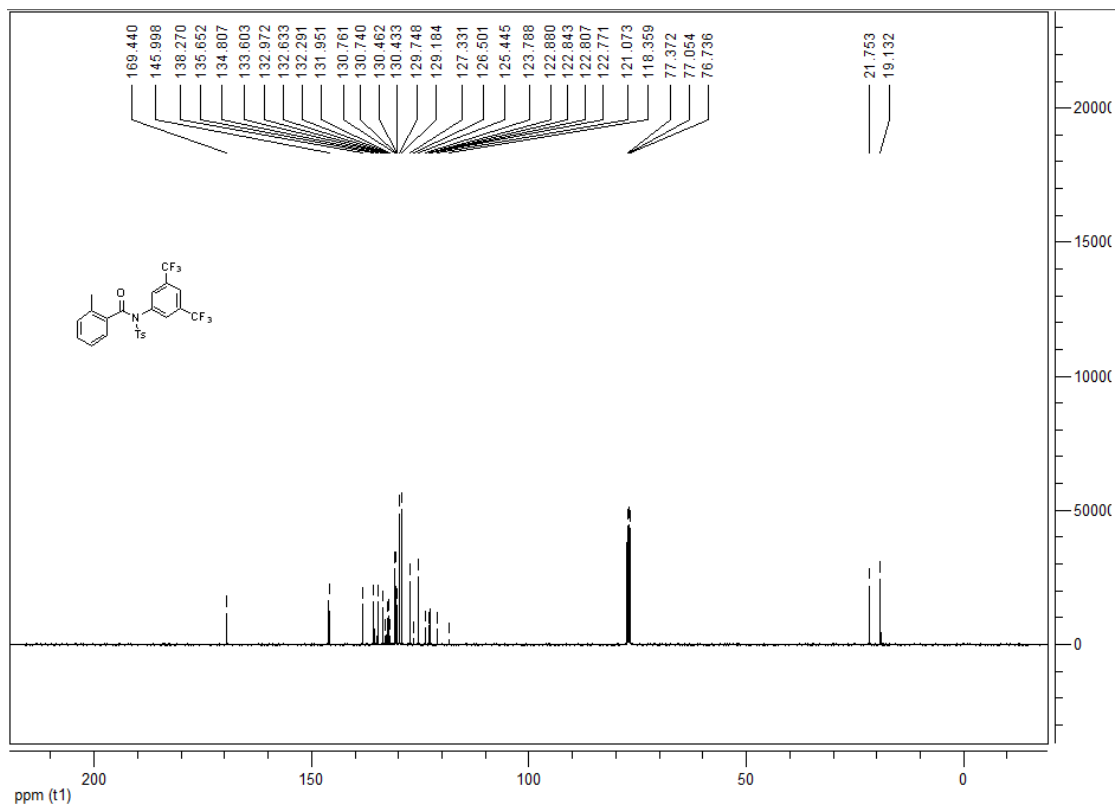

# 4-chloro-N-phenyl-N-tosylbenzamide 1w

## <sup>1</sup>H NMR

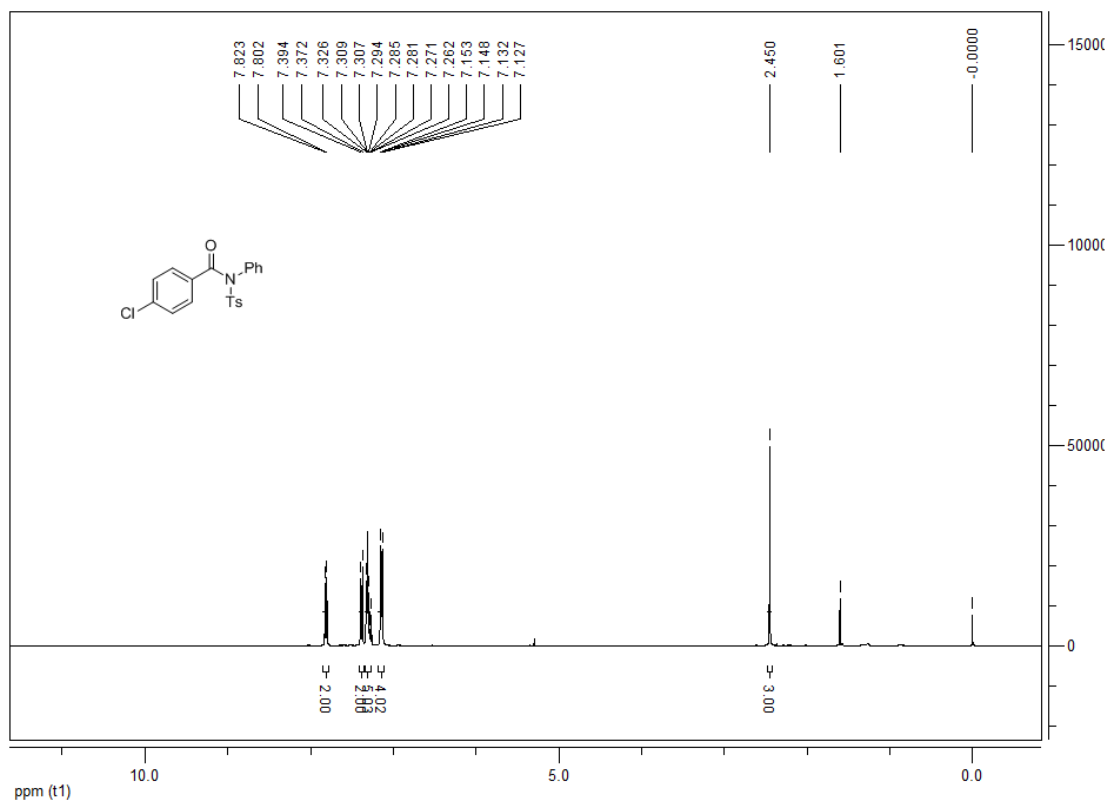

## <sup>13</sup>C NMR

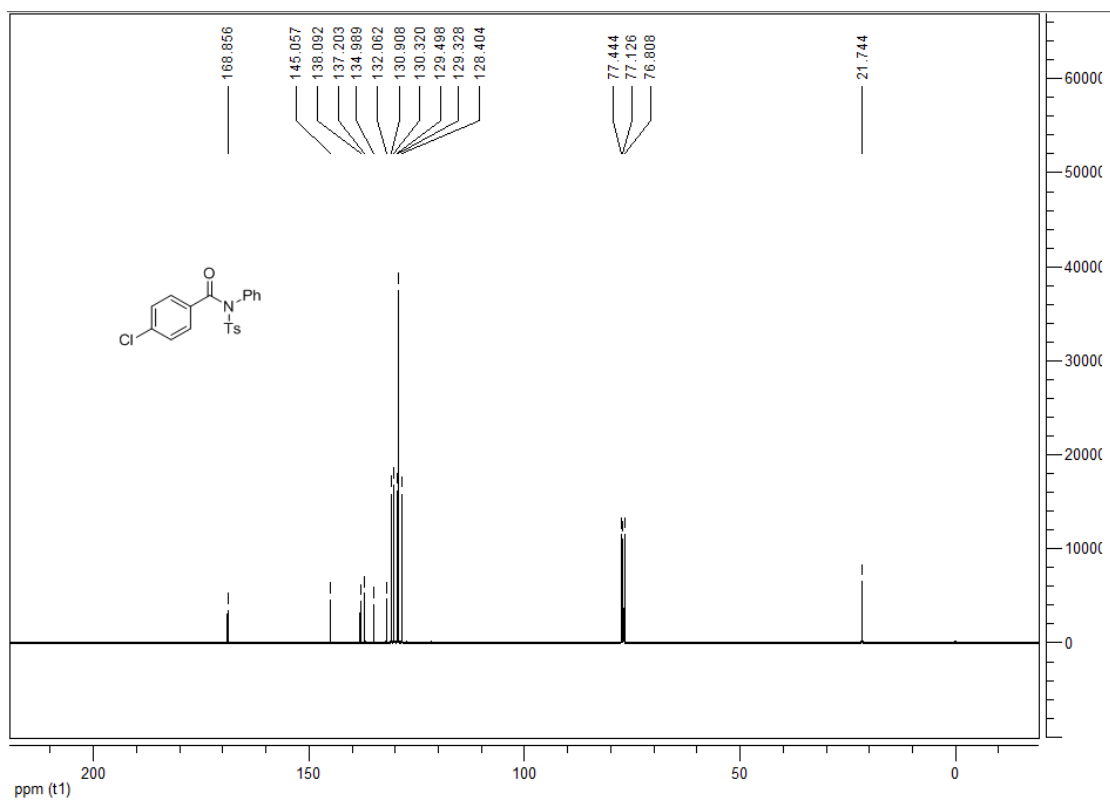

# 4-bromo-N-phenyl-N-tosylbenzamide 1x

## <sup>1</sup>H NMR

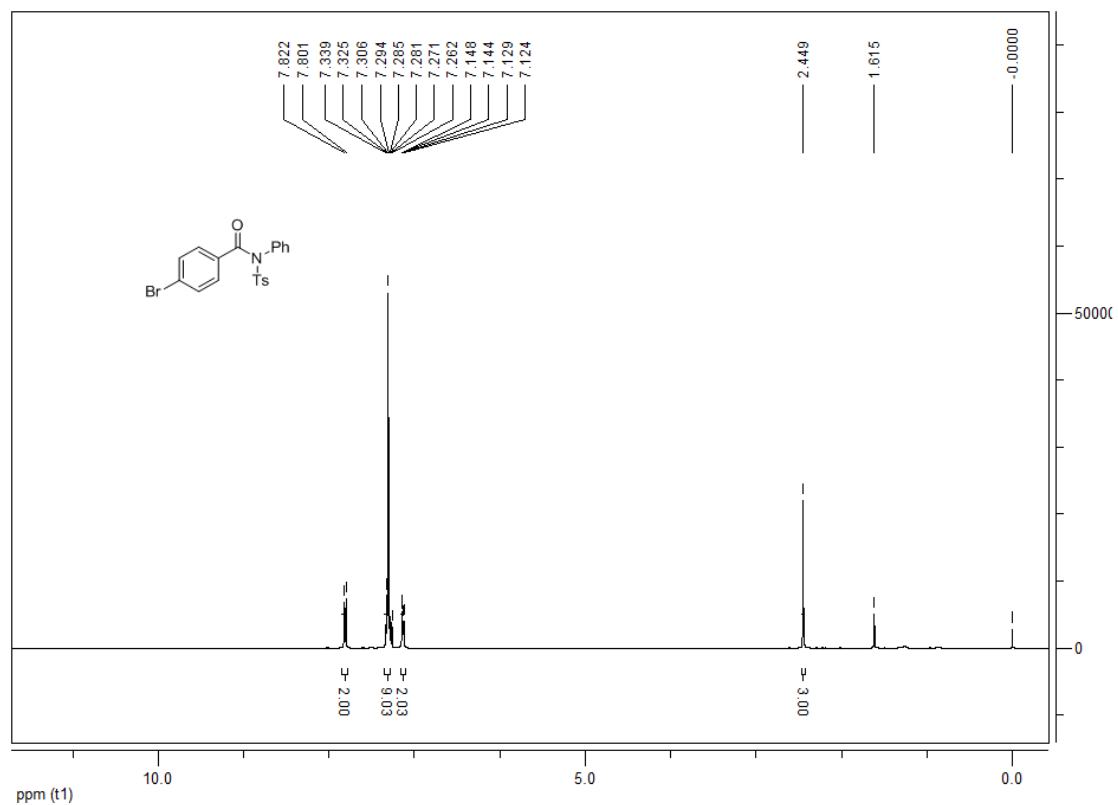

## <sup>13</sup>C NMR

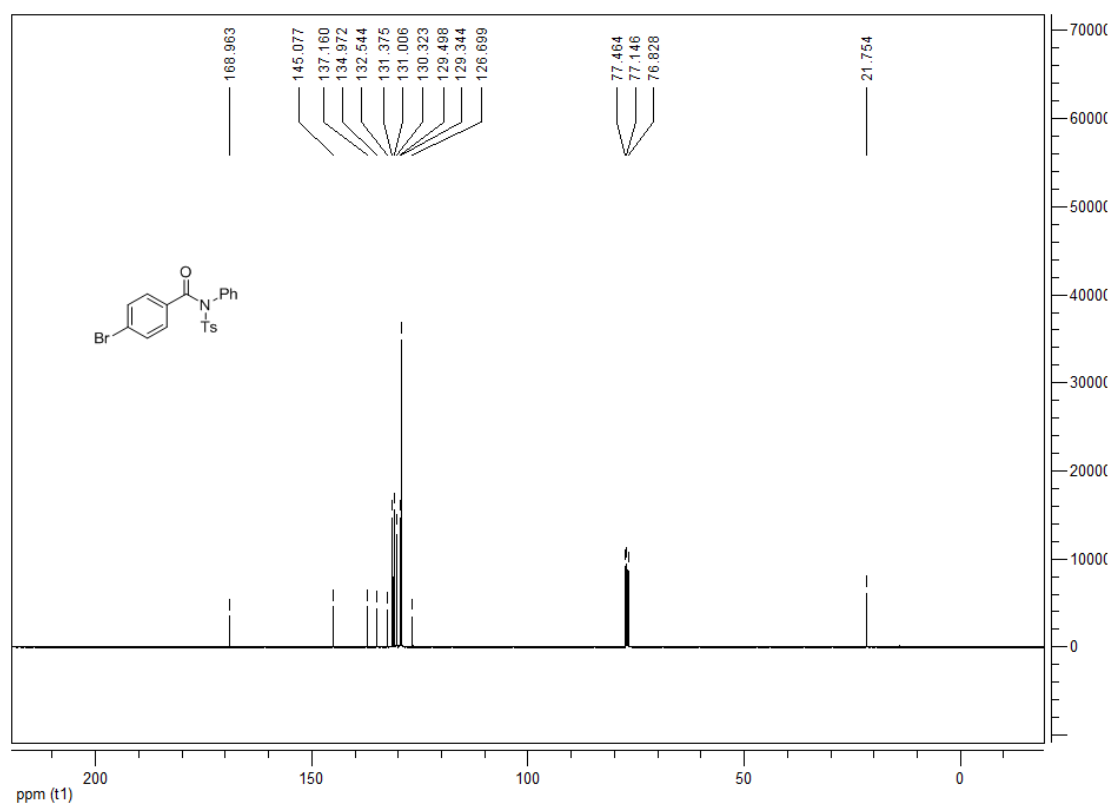



# N-(4-acetylphenyl)-2-methyl-N-tosylbenzamide 1t-1

## <sup>1</sup>H NMR

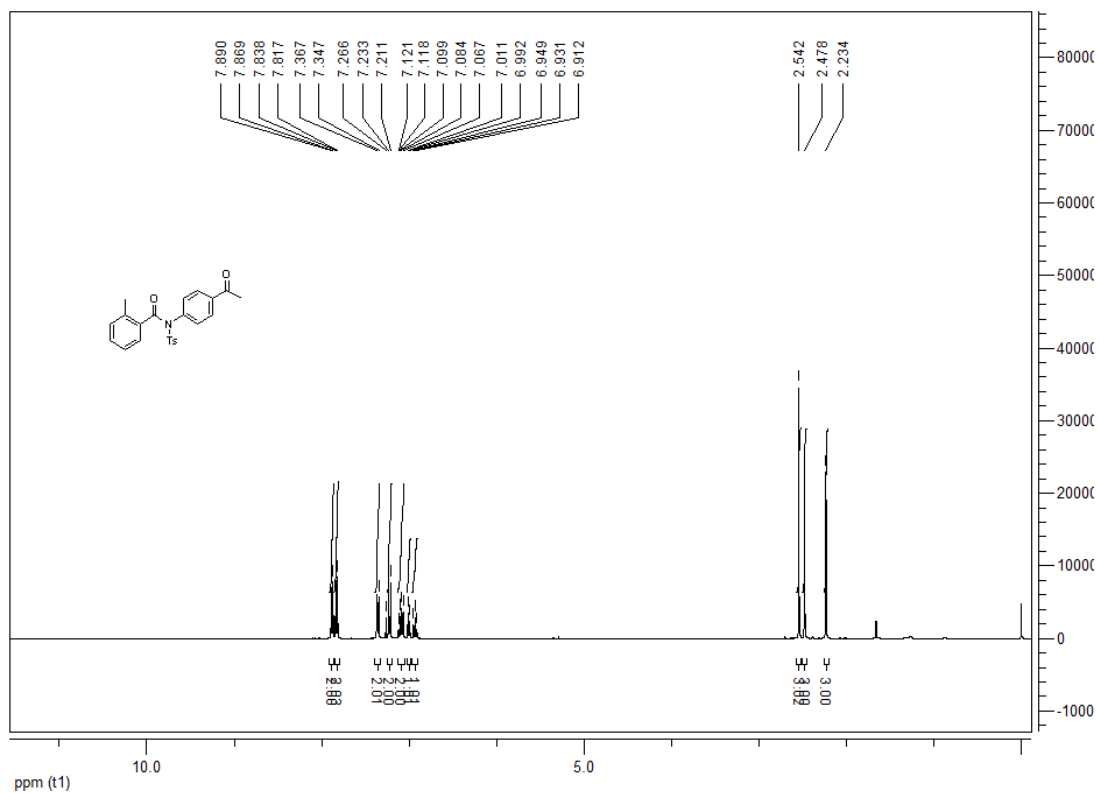

## <sup>13</sup>C NMR

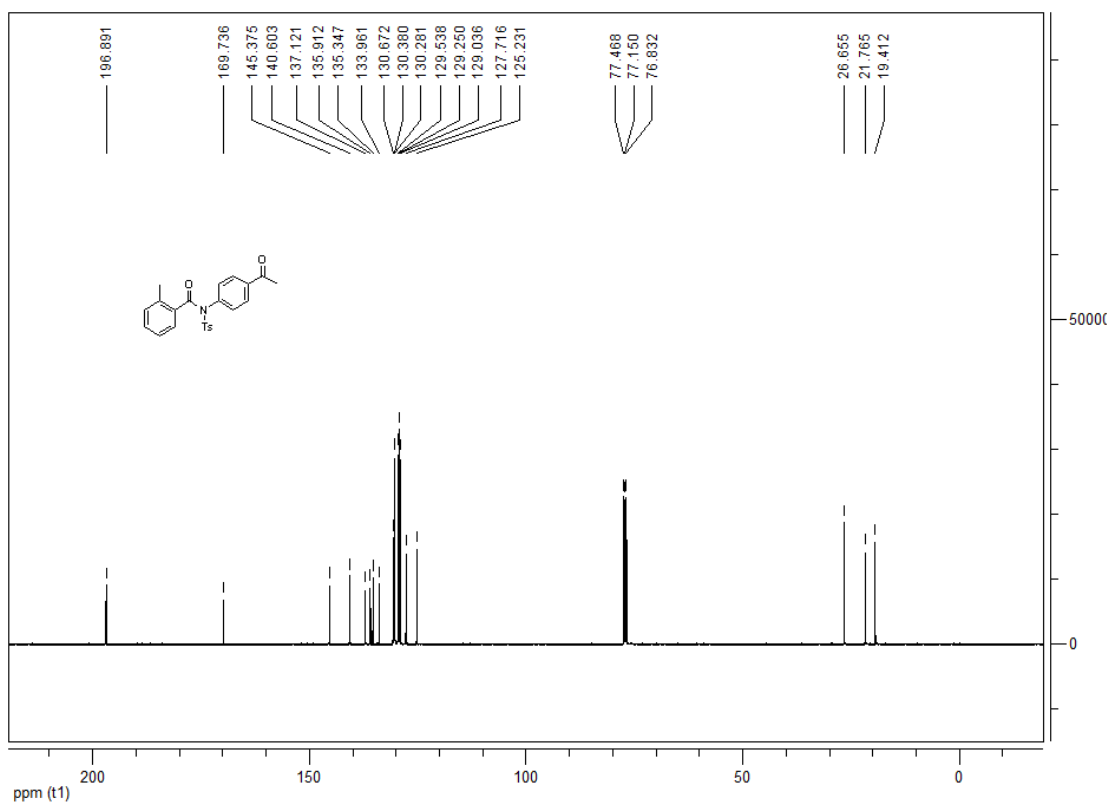

# N-(2,4-difluorophenyl)-2-methyl-N-tosylbenzamide 1t-2

## <sup>1</sup>H NMR

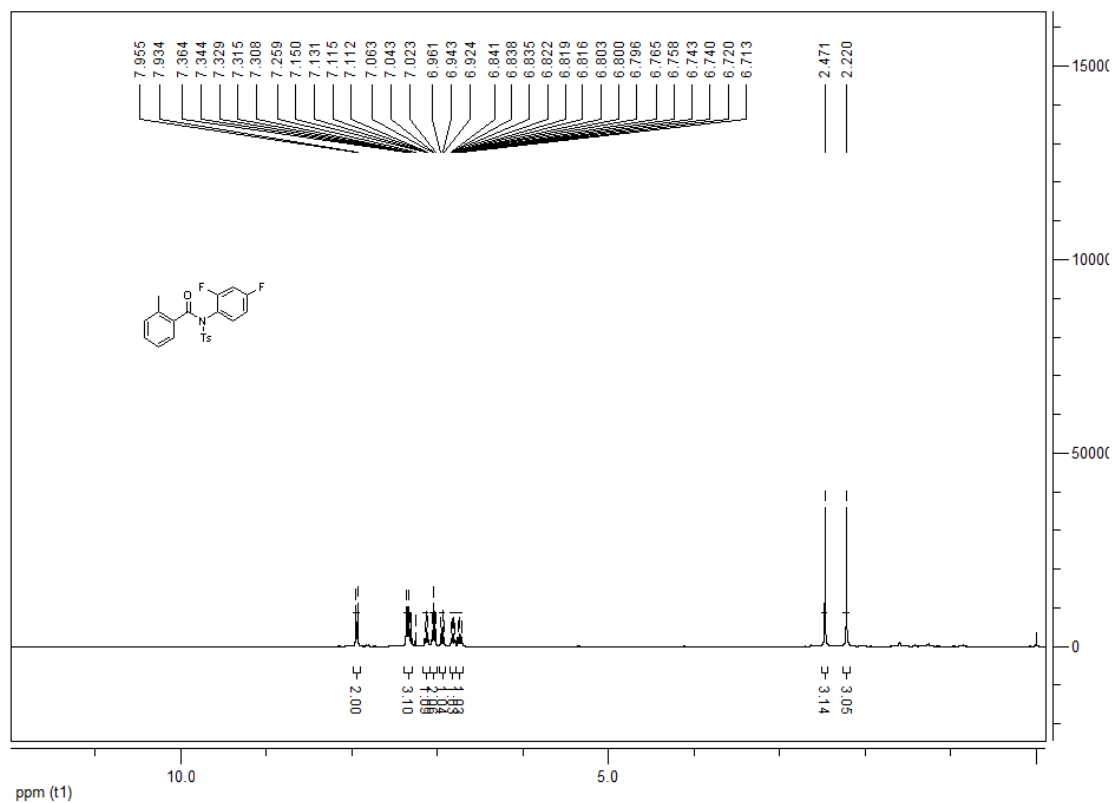

## <sup>13</sup>C NMR

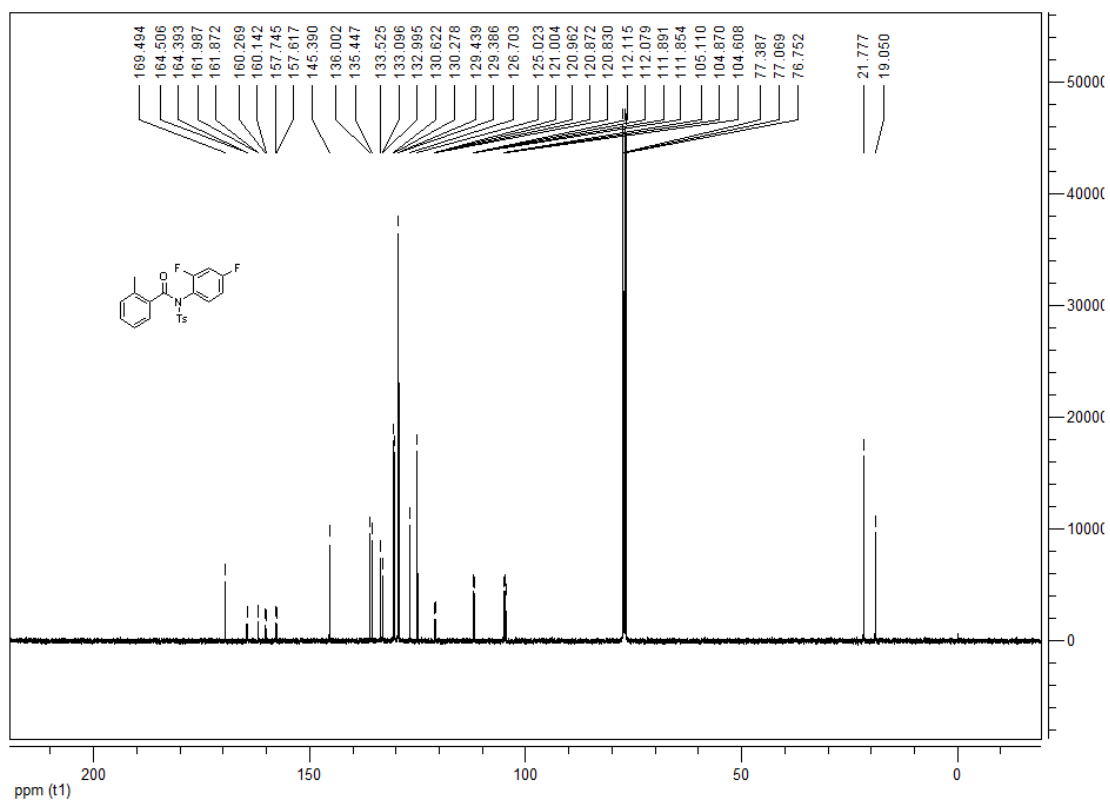

### 2-methyl-N-tosyl-N-(3-(trifluoromethyl)phenyl)benzamide 1t-3

<sup>1</sup>H NMR

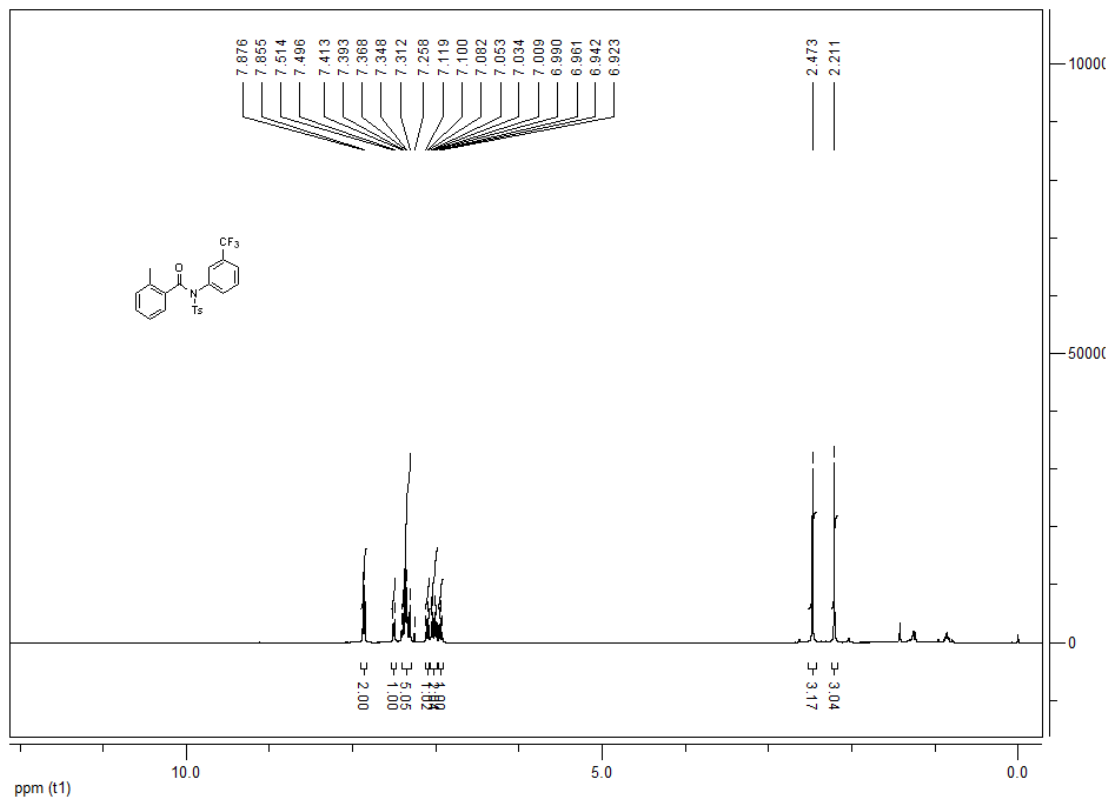

<sup>13</sup>C NMR

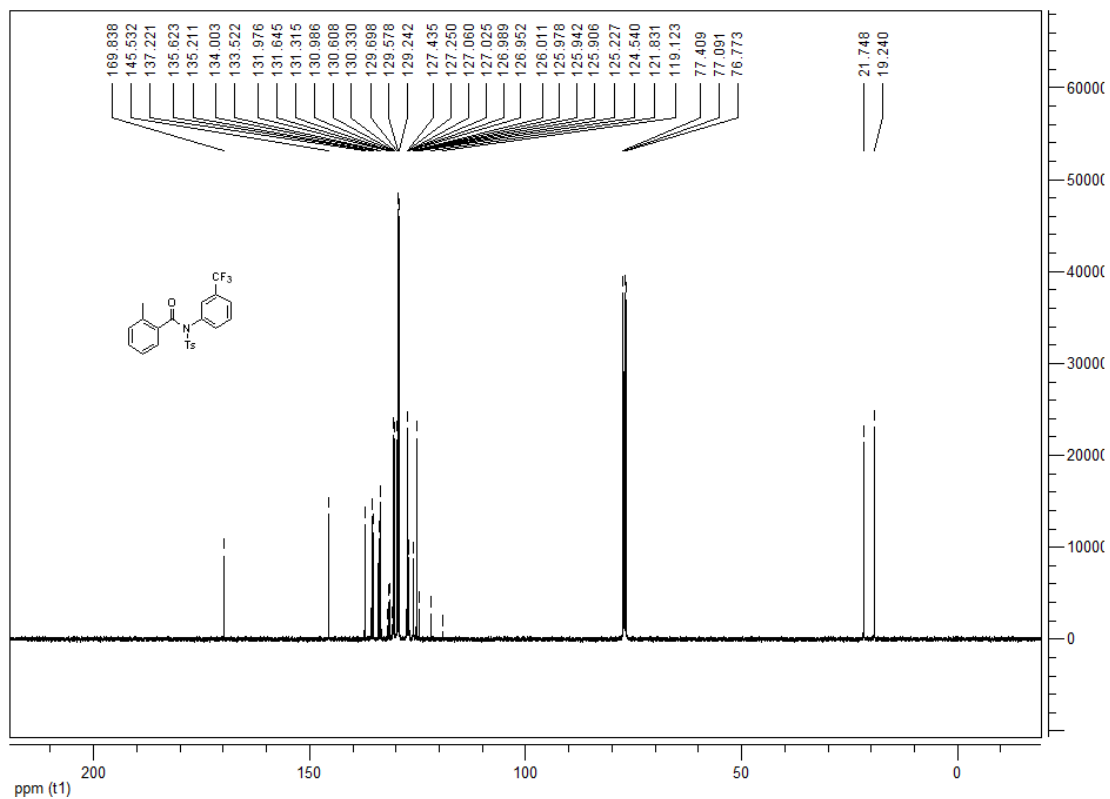

## 2-methyl-N-tosyl-N-(4-(trifluoromethyl)phenyl)benzamide 1t-4

### $^1\text{H}$ NMR

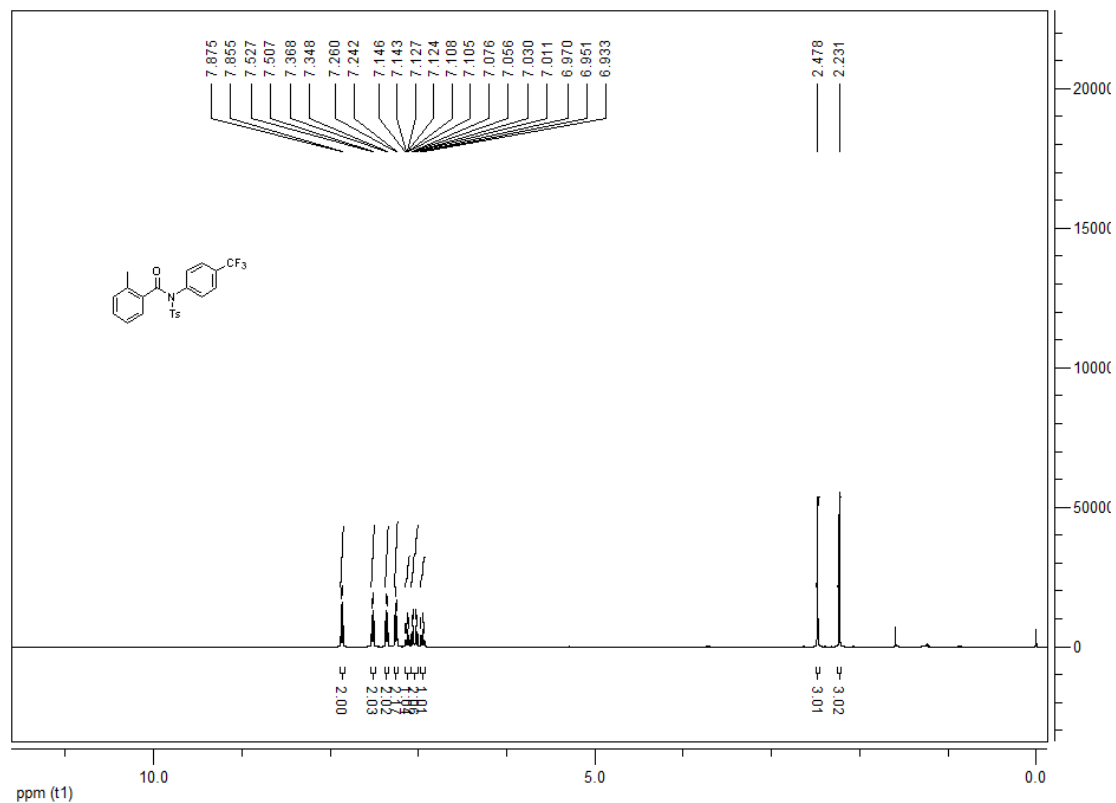

### $^{13}\text{C}$ NMR

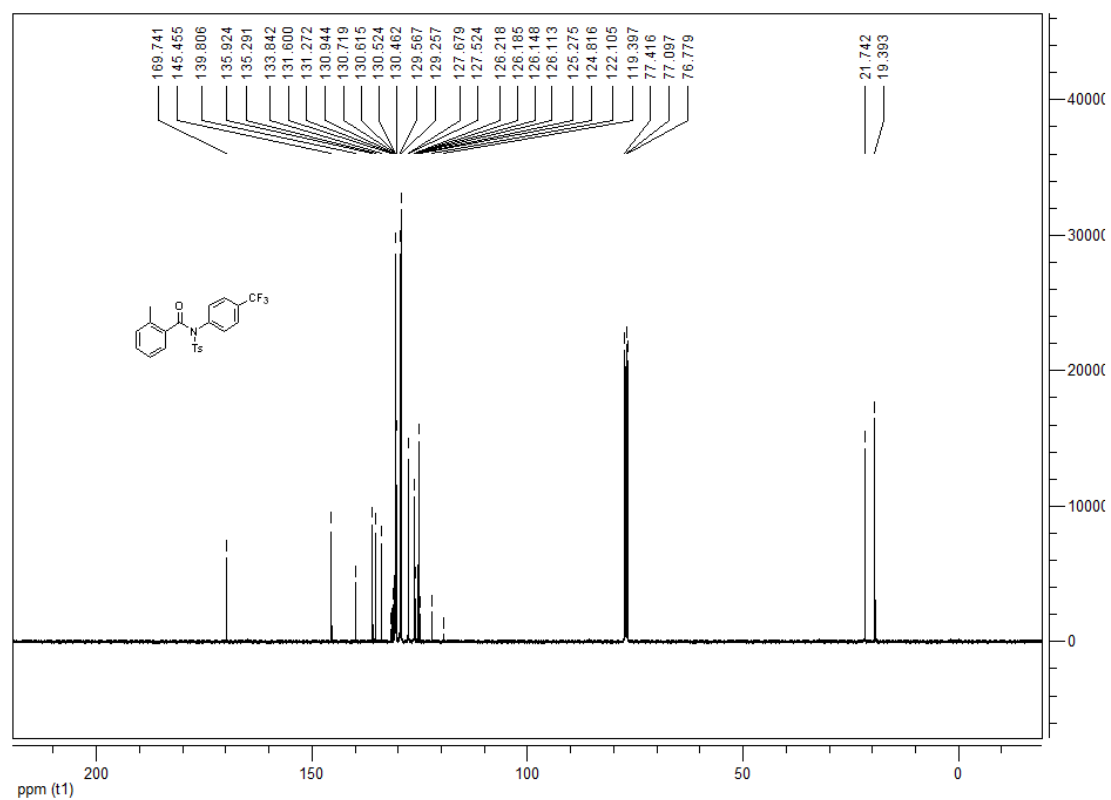

# N-(3,5-difluorophenyl)-2-methyl-N-tosylbenzamide 1t-5

## <sup>1</sup>H NMR

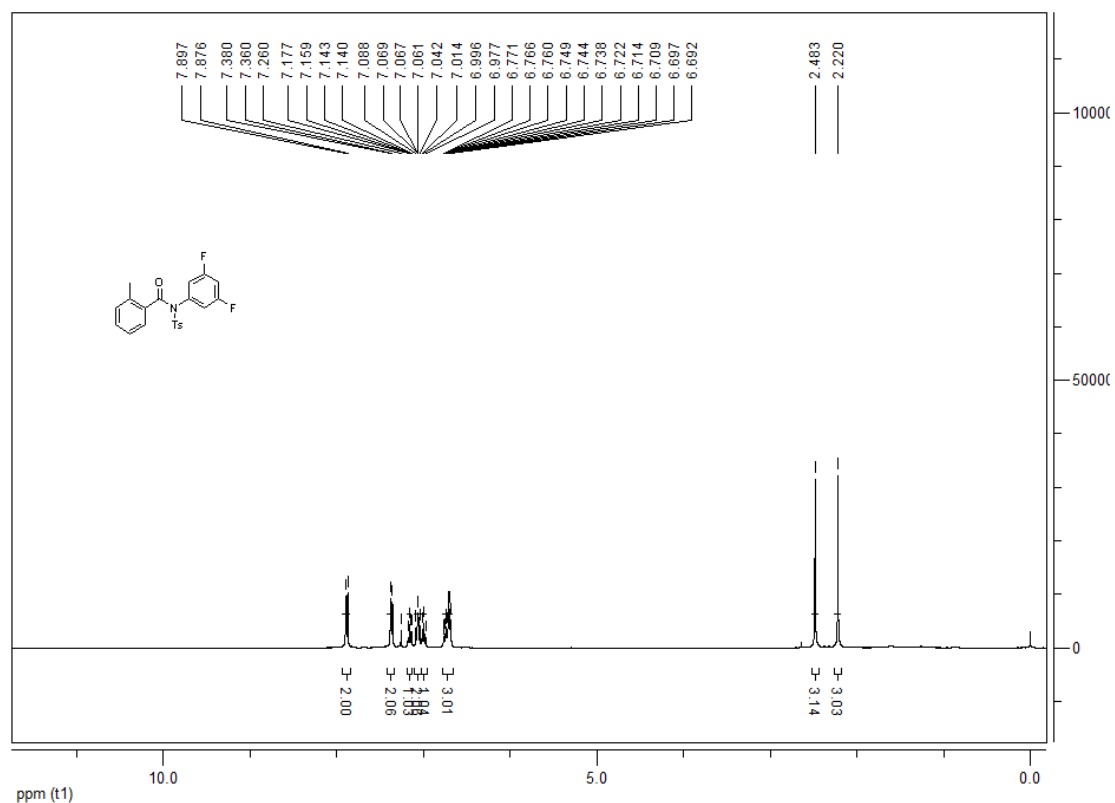

## <sup>13</sup>C NMR

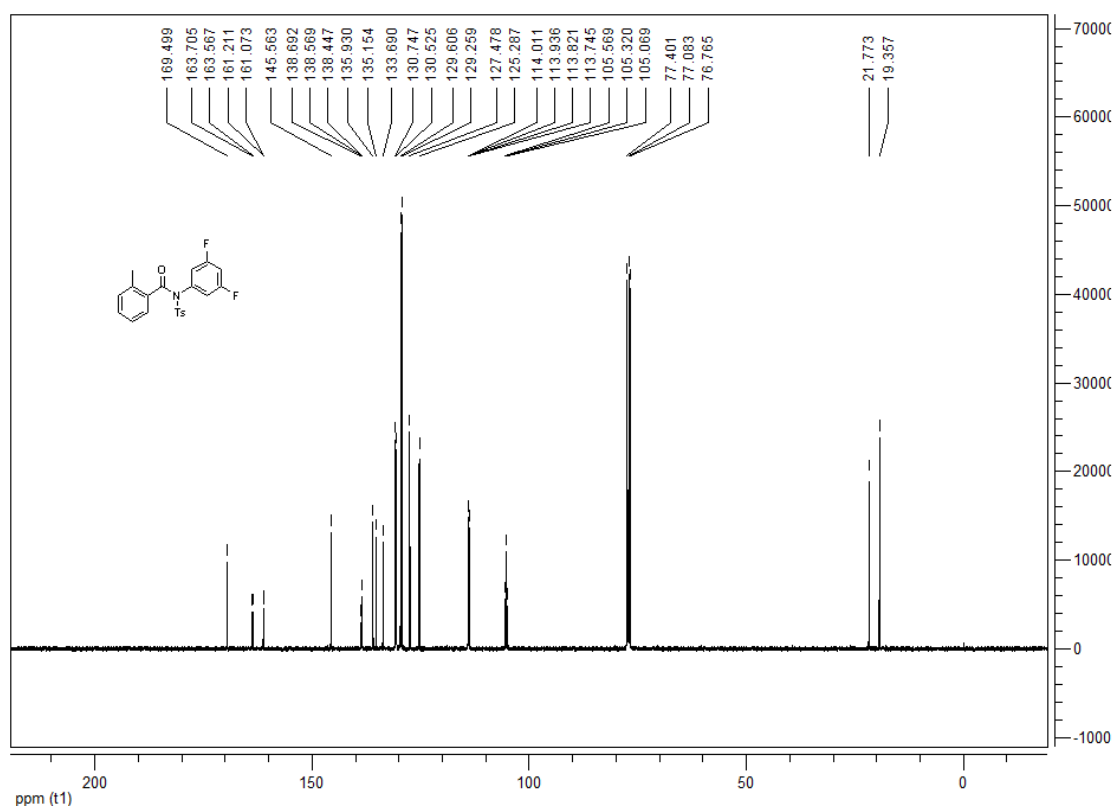

# benzophenone 3aa

## <sup>1</sup>H NMR

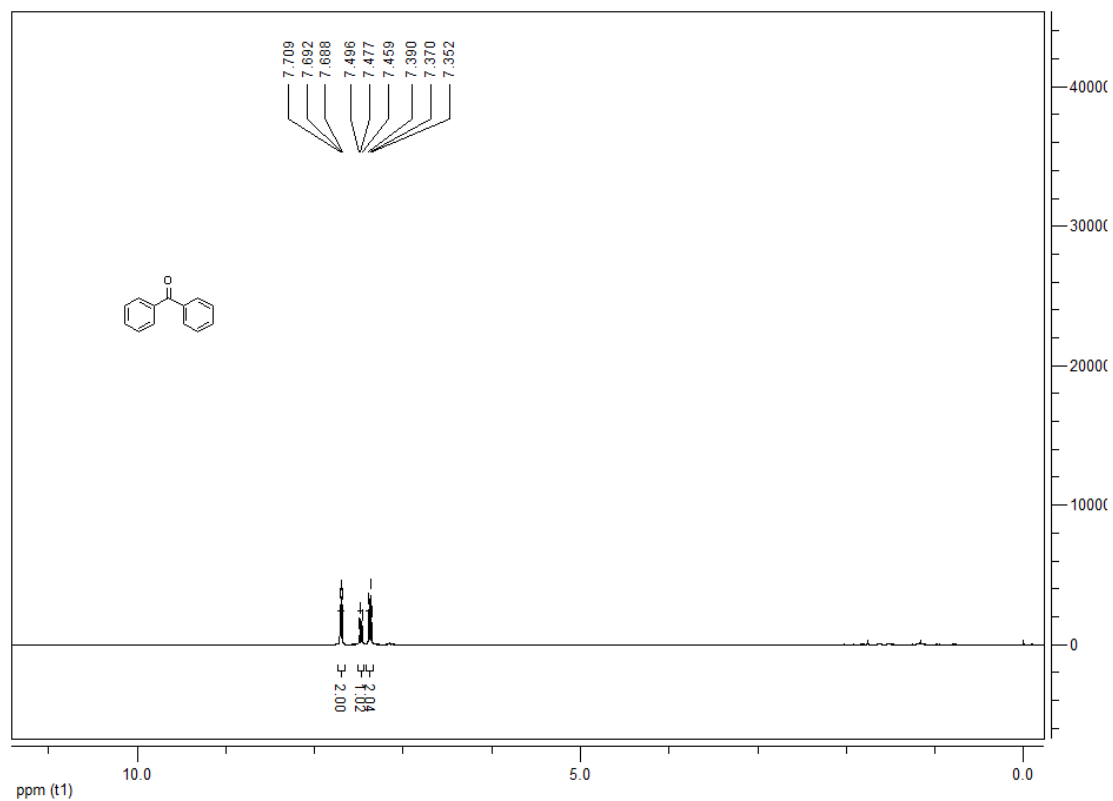

## <sup>13</sup>C NMR

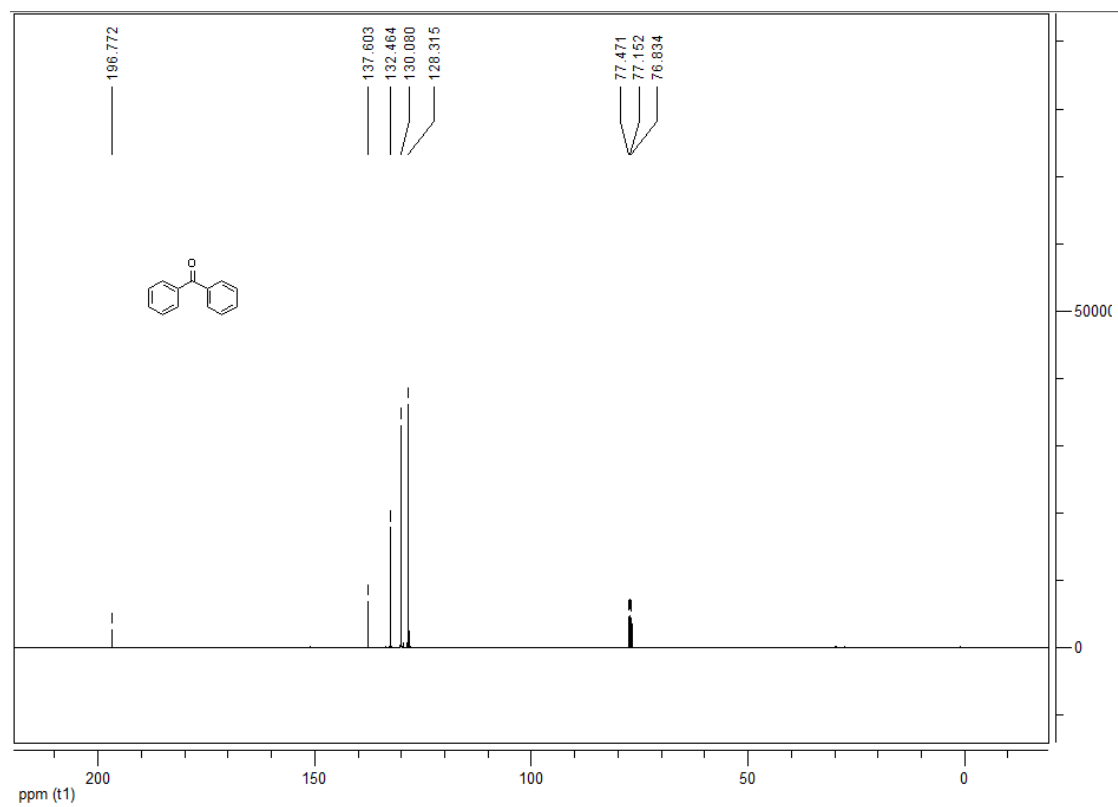

# phenyl(p-tolyl)methanone 3db

## <sup>1</sup>H NMR

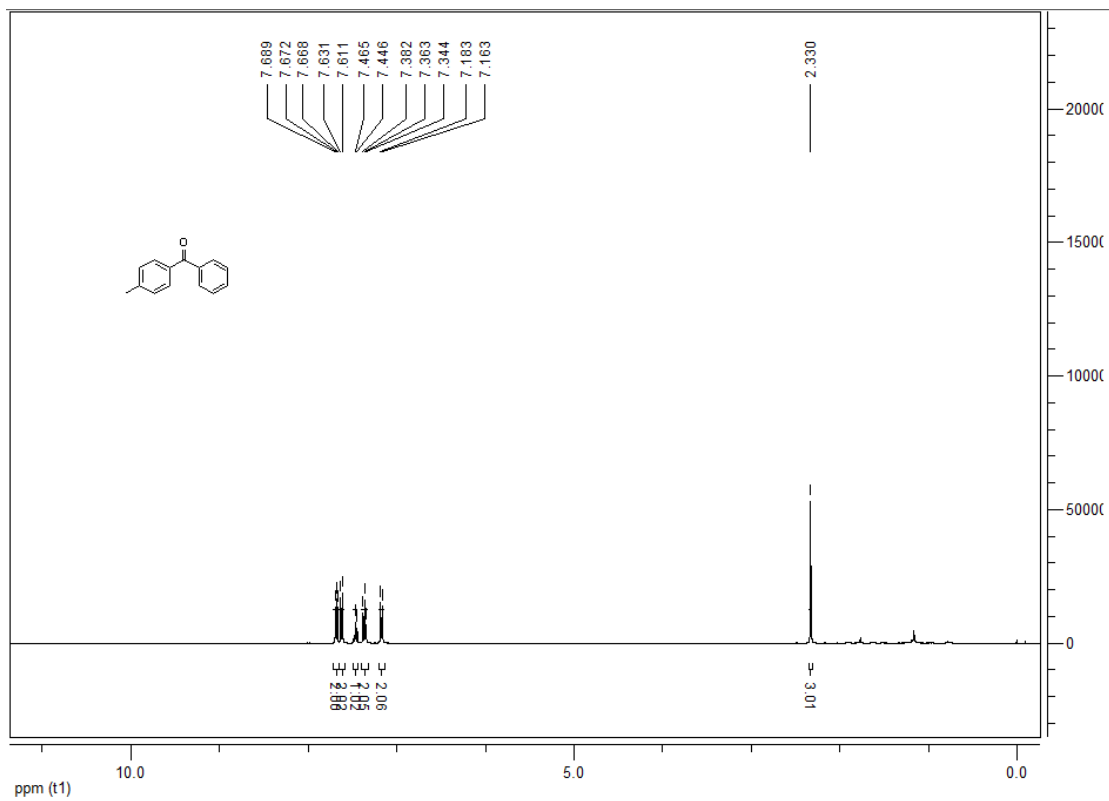

## <sup>13</sup>C NMR

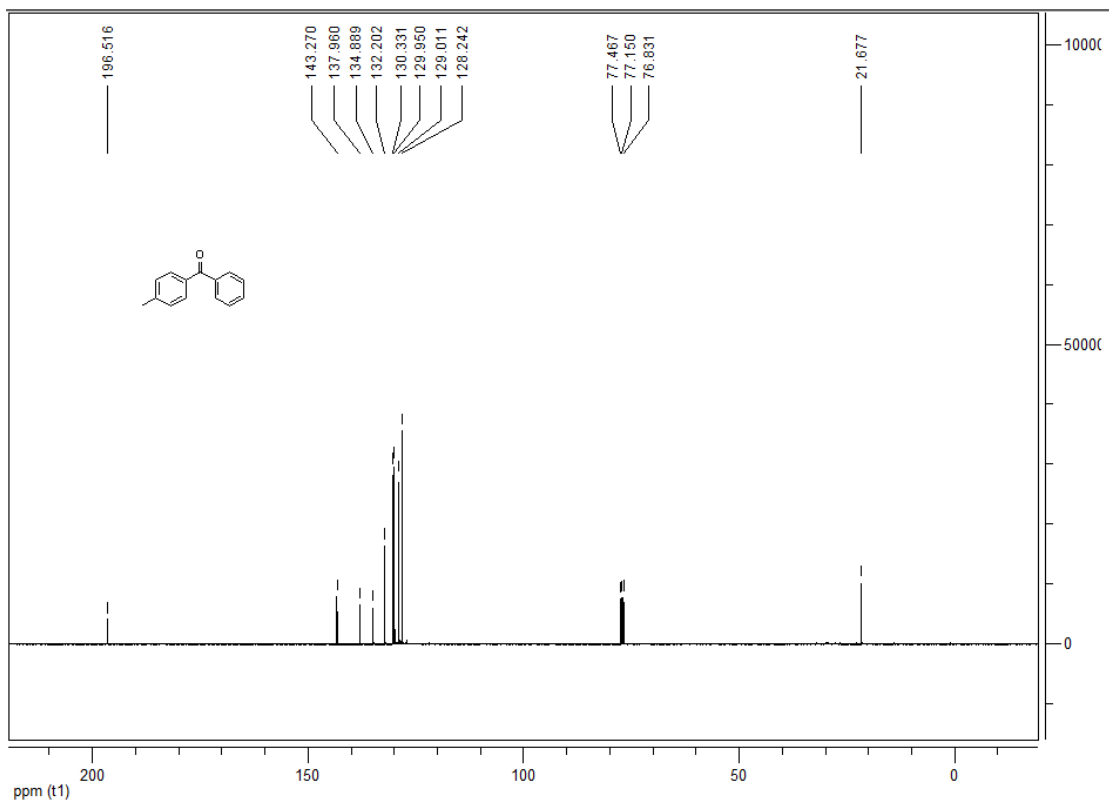

# (4-methoxyphenyl)(phenyl)methanone 3dc

## <sup>1</sup>H NMR

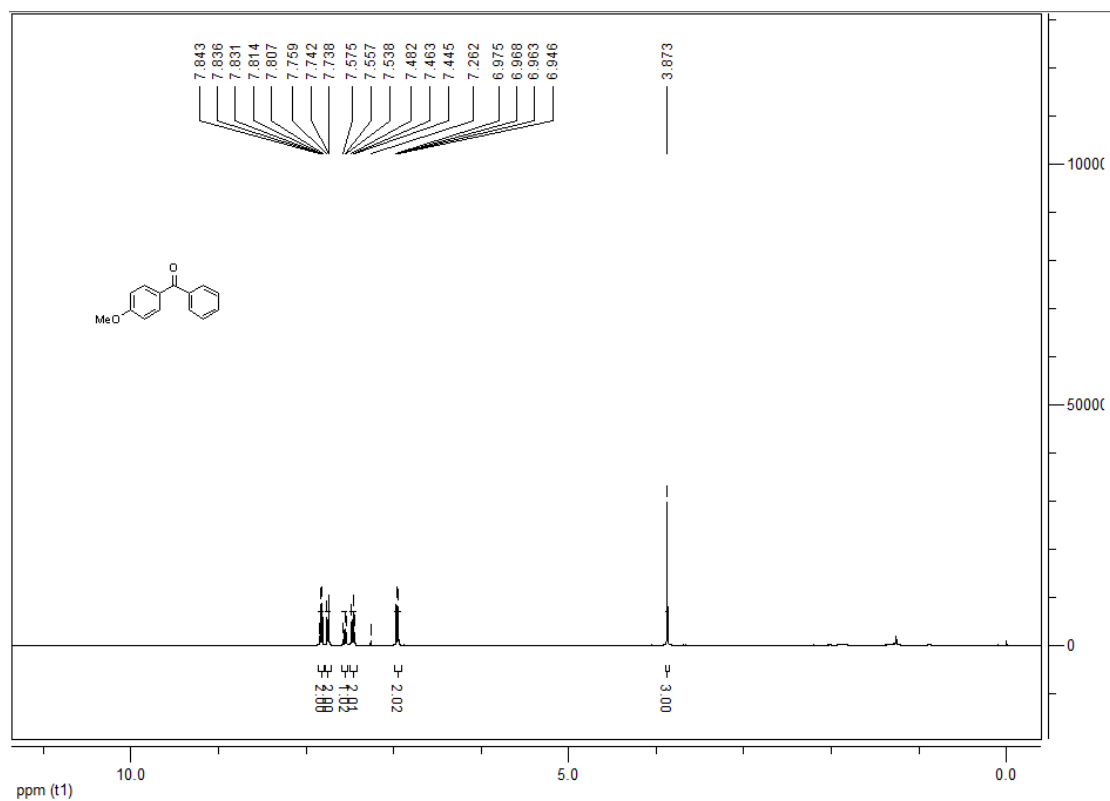

## <sup>13</sup>C NMR

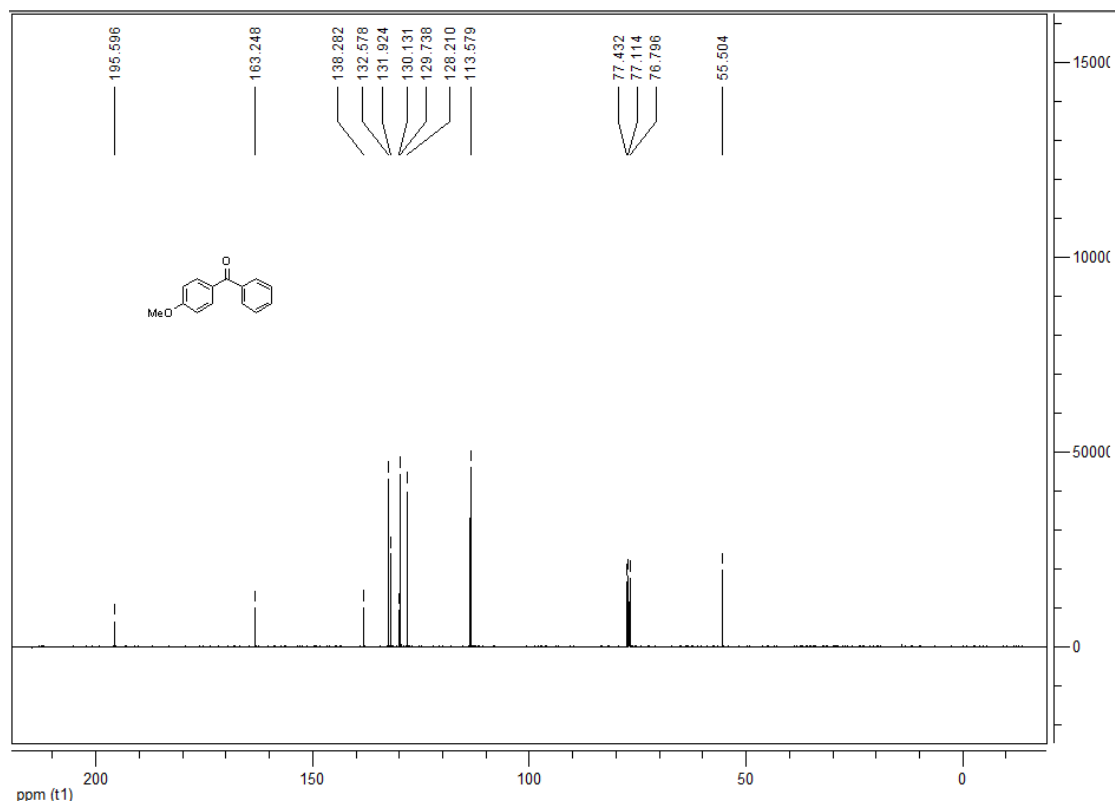



# (4-fluorophenyl)(phenyl)methanone 3dd

## <sup>1</sup>H NMR

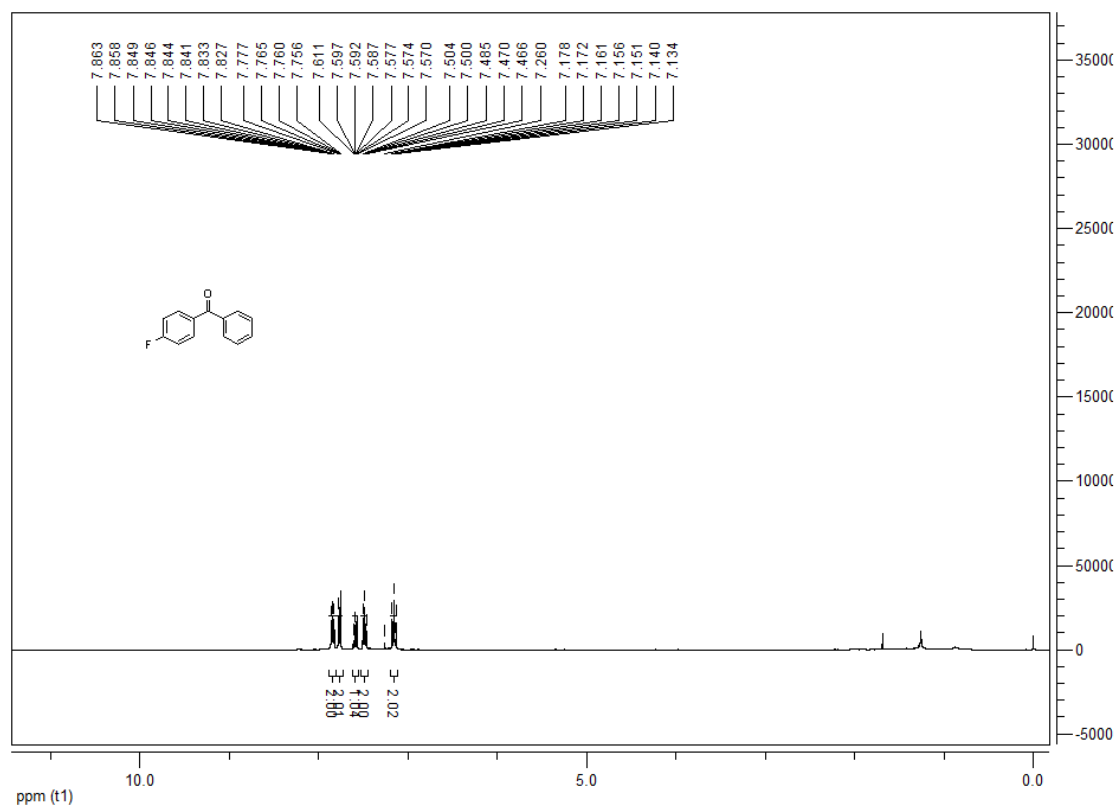

## <sup>13</sup>C NMR

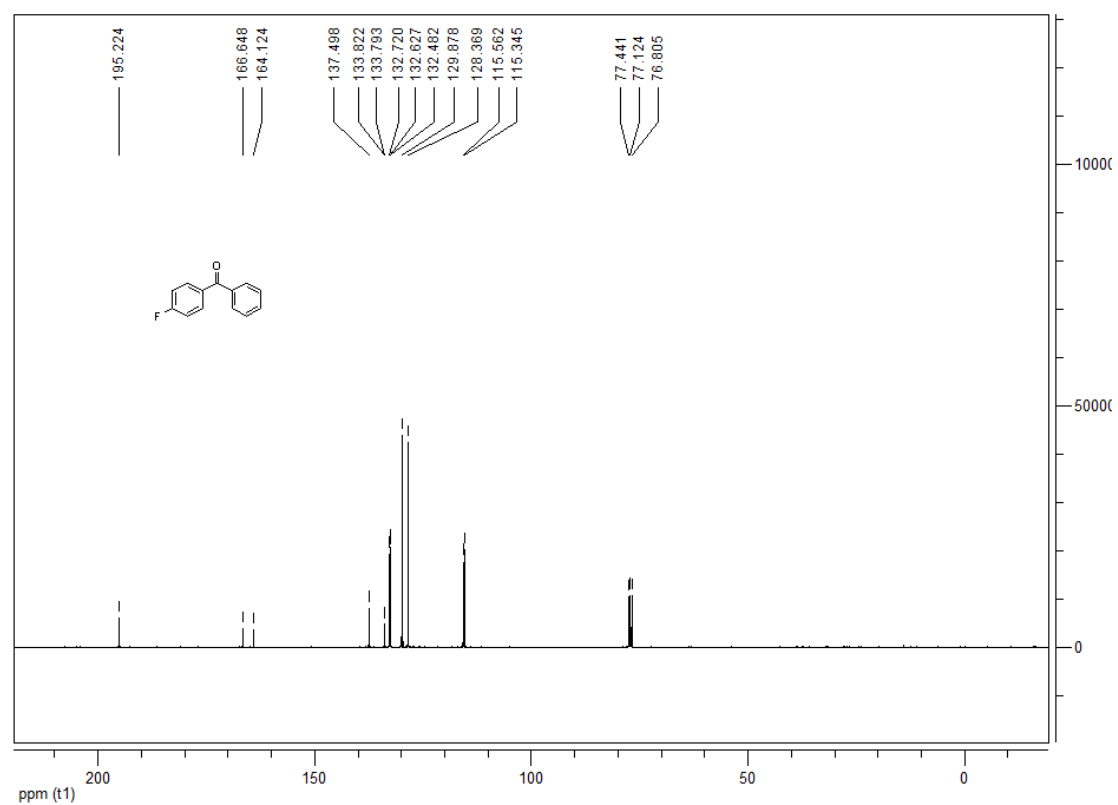

# methyl 4-benzoylbenzoate 3de

## $^1\text{H}$ NMR

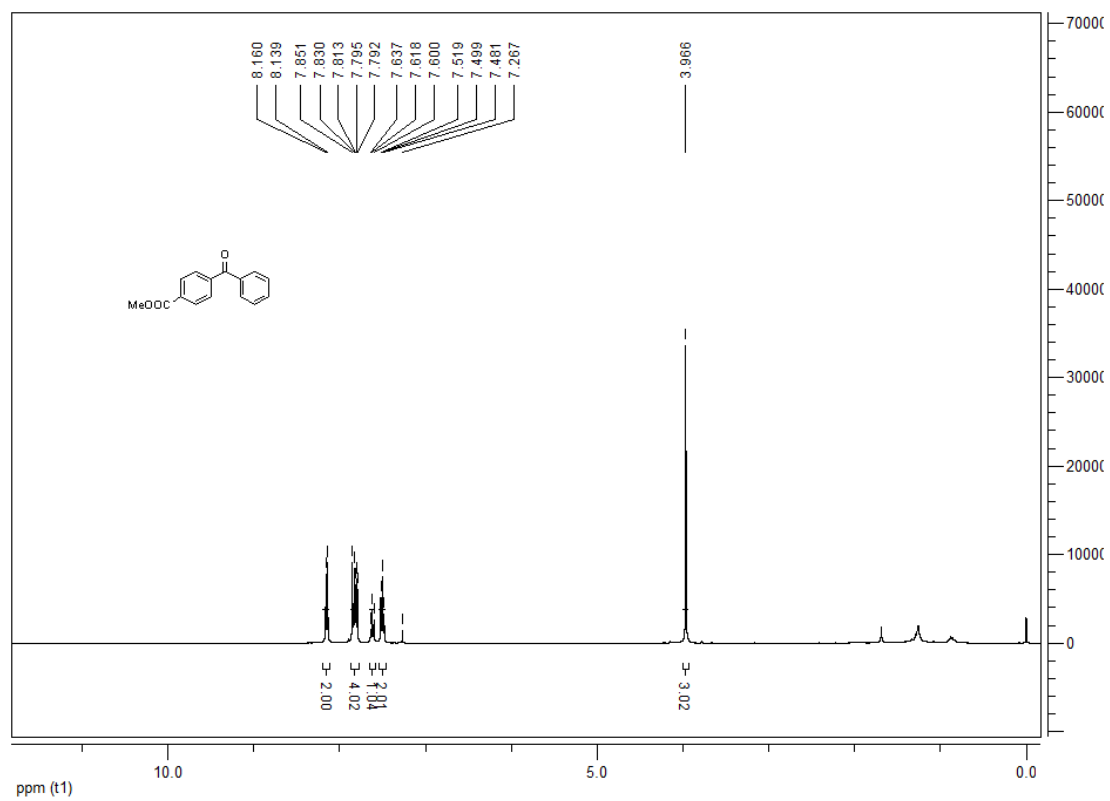

## $^{13}\text{C}$ NMR

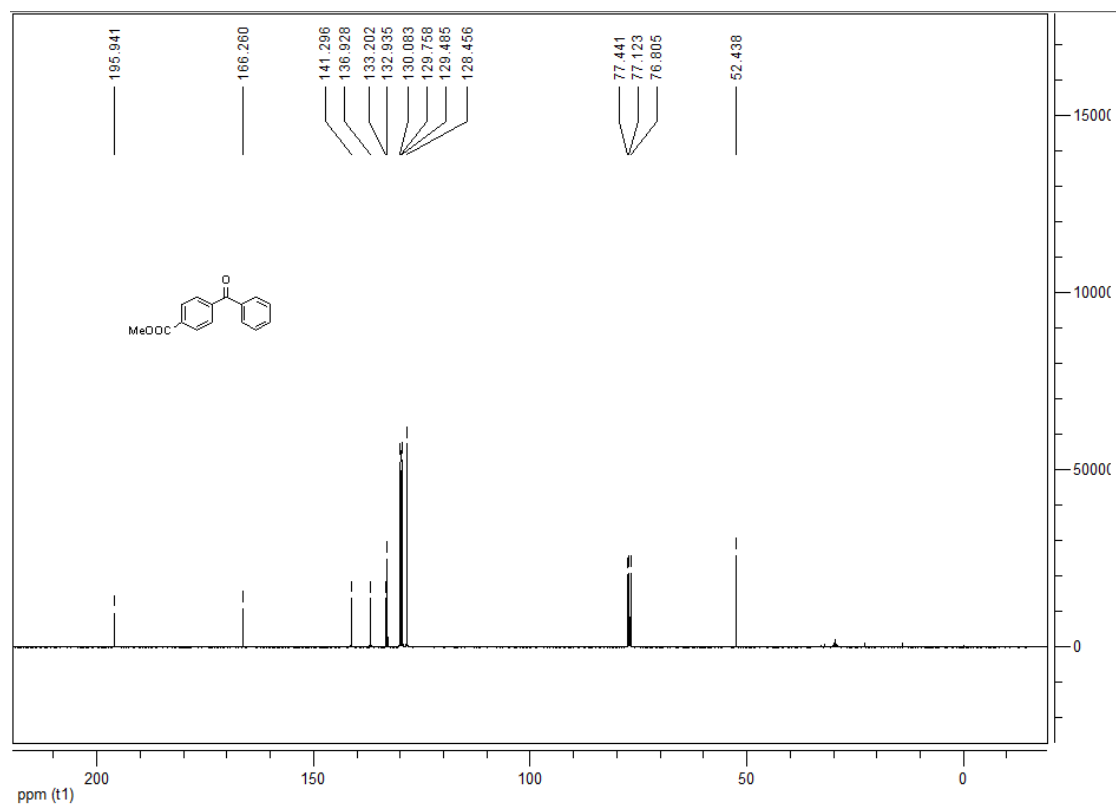

### 4-benzoylbenzonitrile 3df

### <sup>1</sup>H NMR

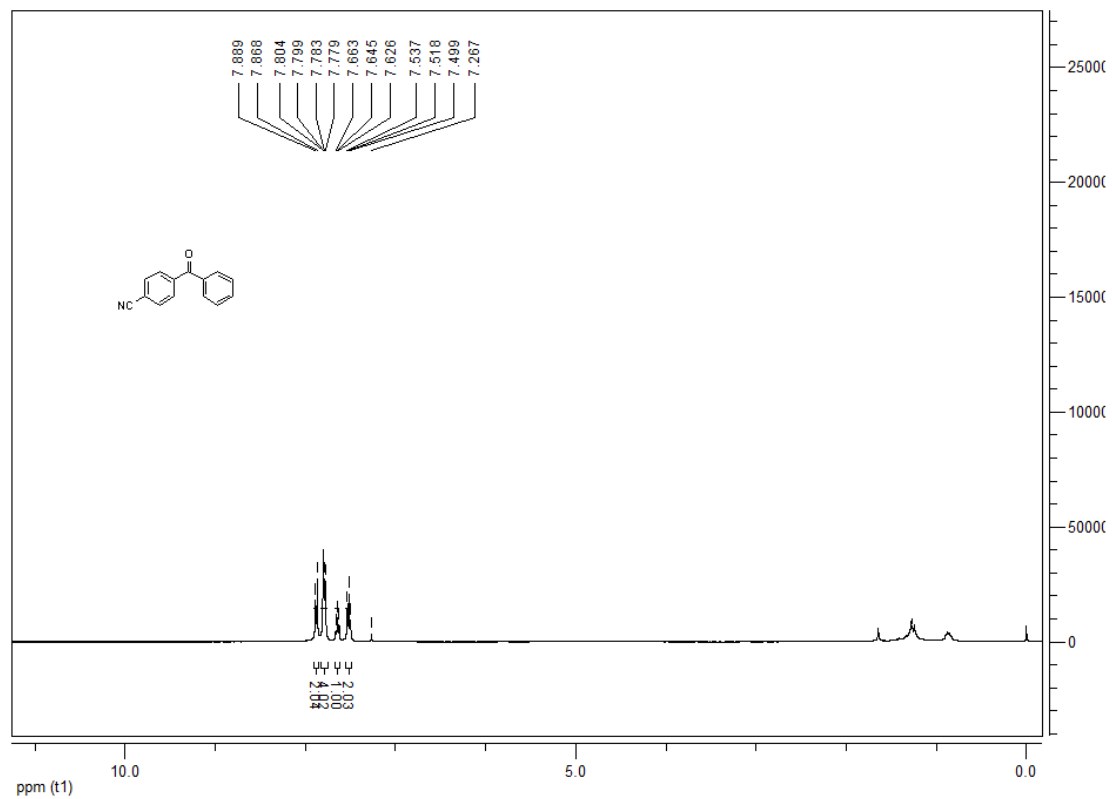

### <sup>13</sup>C NMR

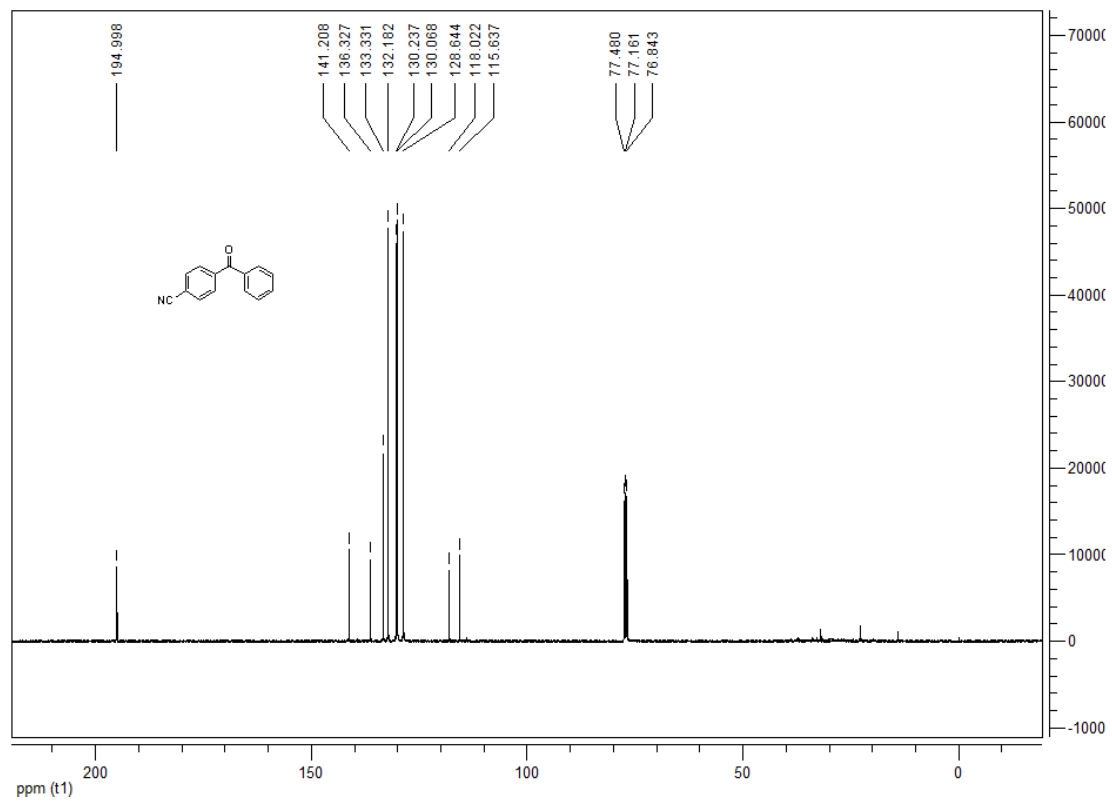

# 1-(4-benzoylphenyl)ethanone 3dg

## <sup>1</sup>H NMR

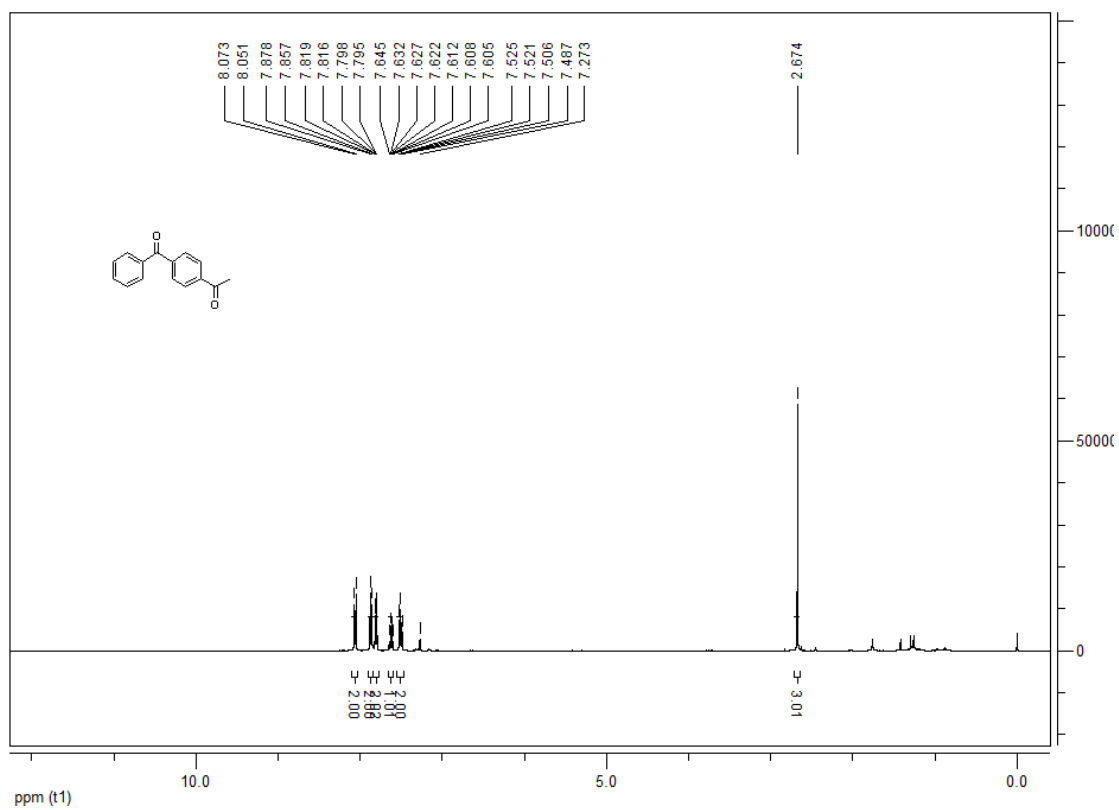

## <sup>13</sup>C NMR

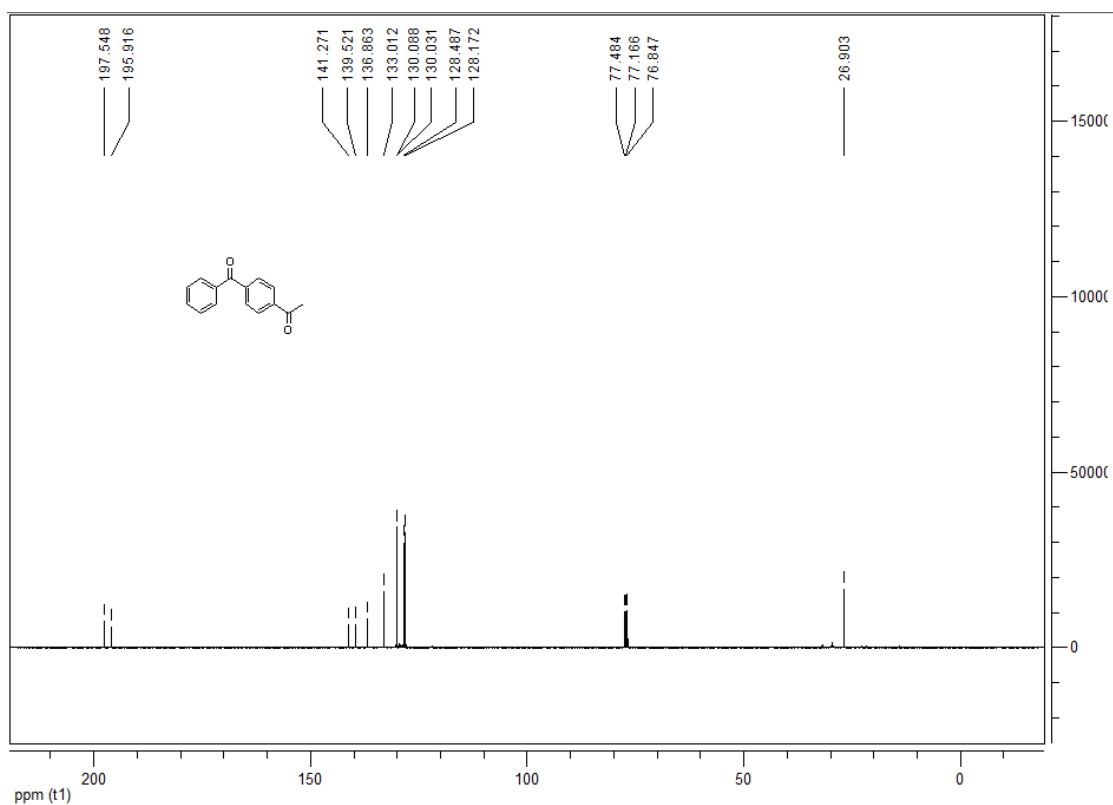



# phenyl(o-tolyl)methanone 3di

## <sup>1</sup>H NMR

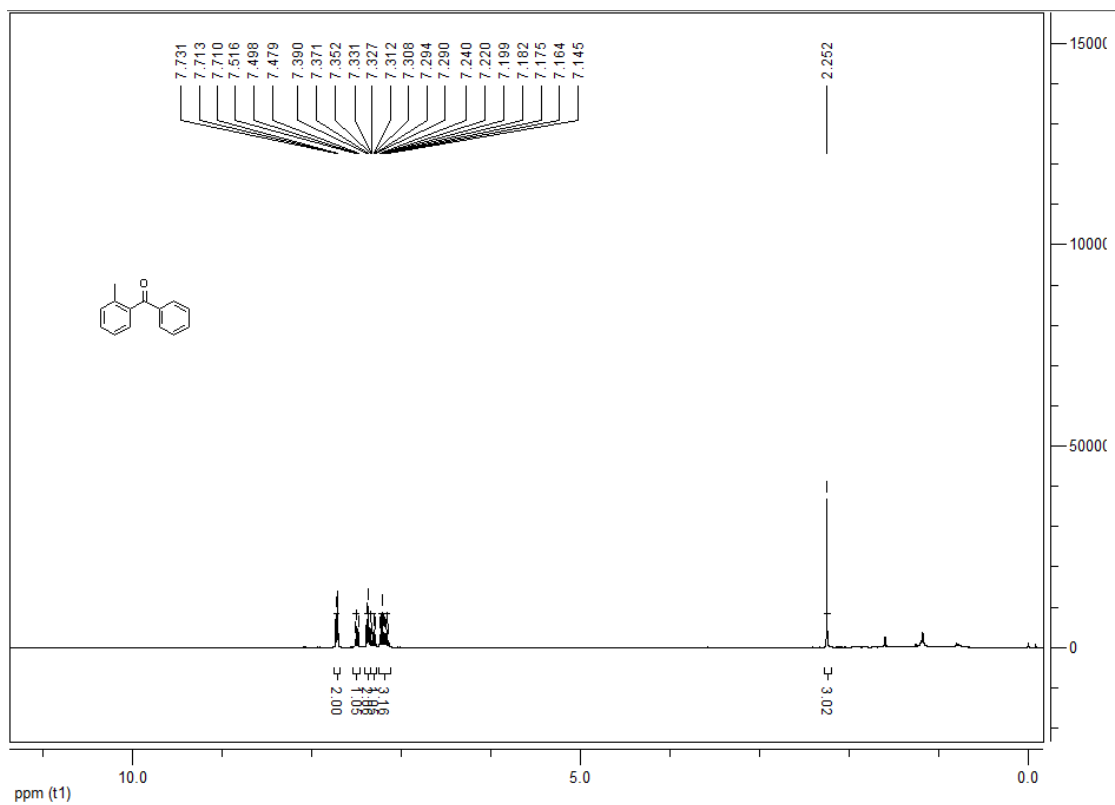

## <sup>13</sup>C NMR

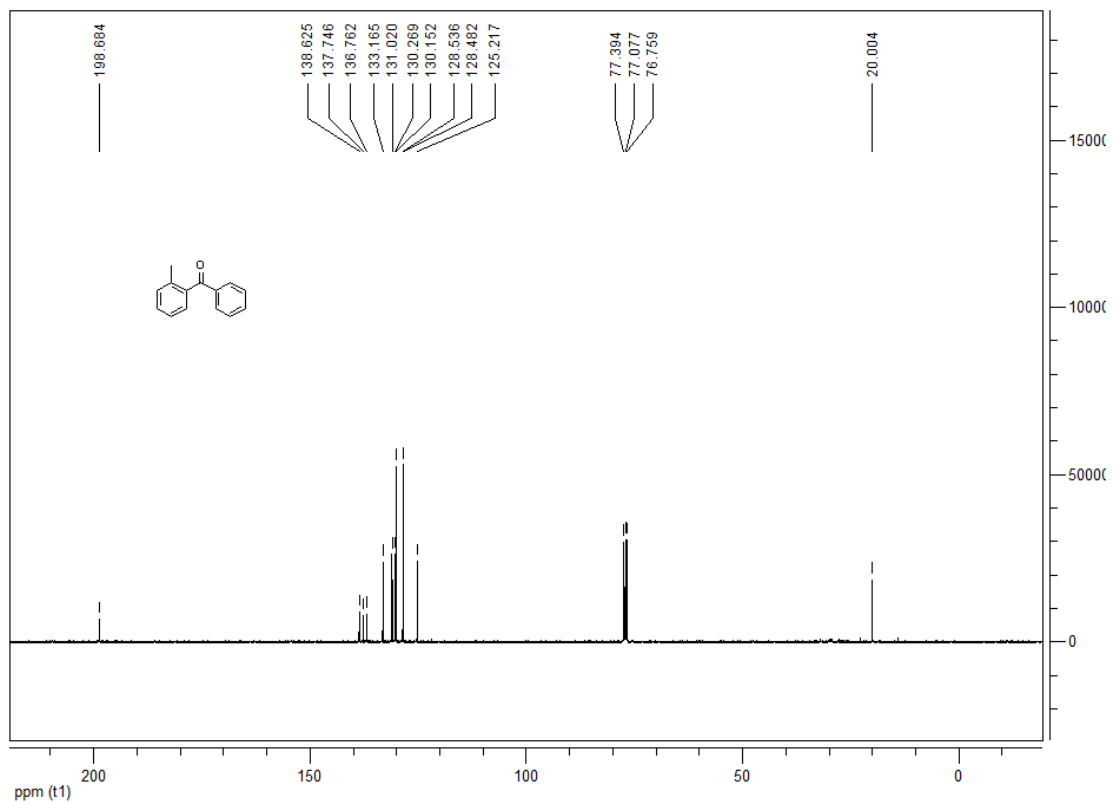

### (2-ethylphenyl)(phenyl)methanone 3dj

#### <sup>1</sup>H NMR

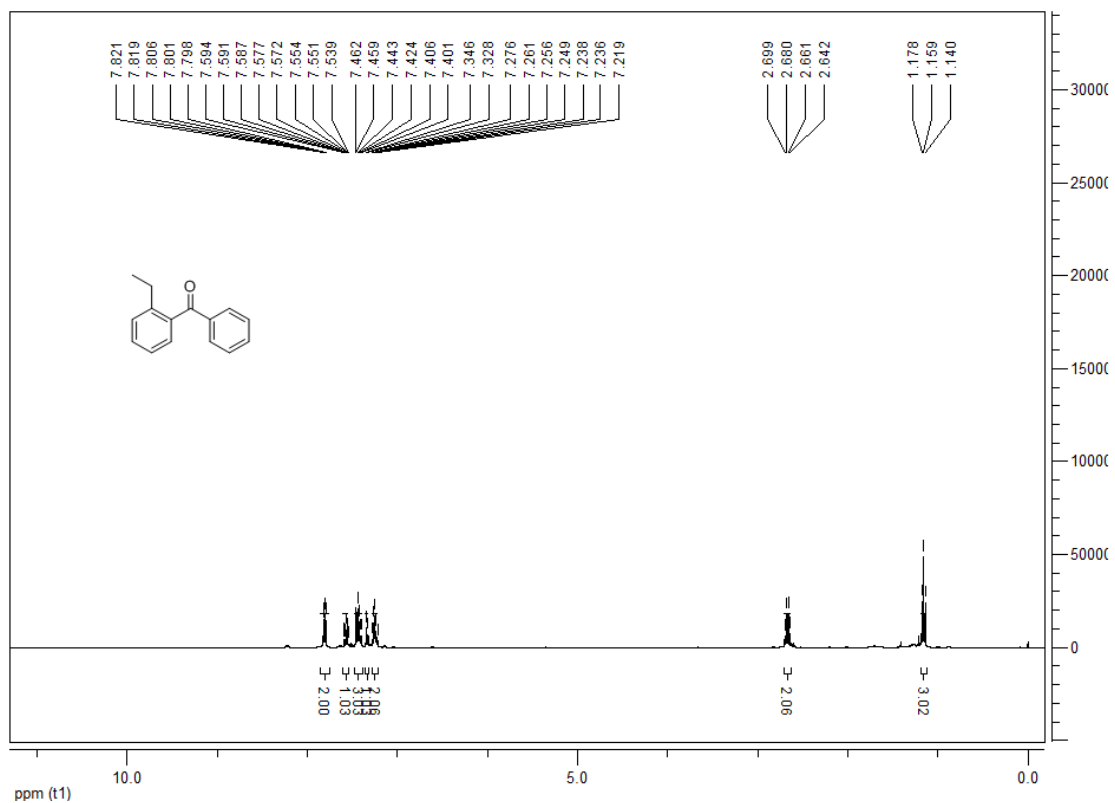

#### <sup>13</sup>C NMR

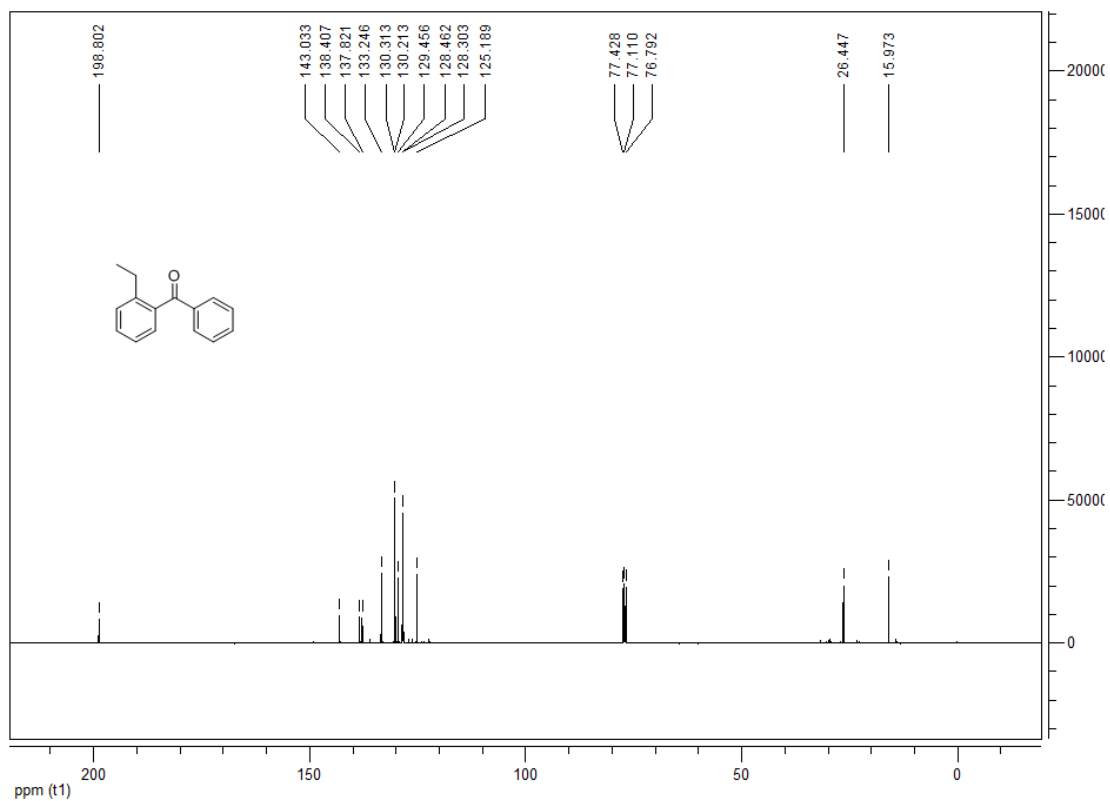

# methyl 2-benzoylbenzoate 3dk

## <sup>1</sup>H NMR

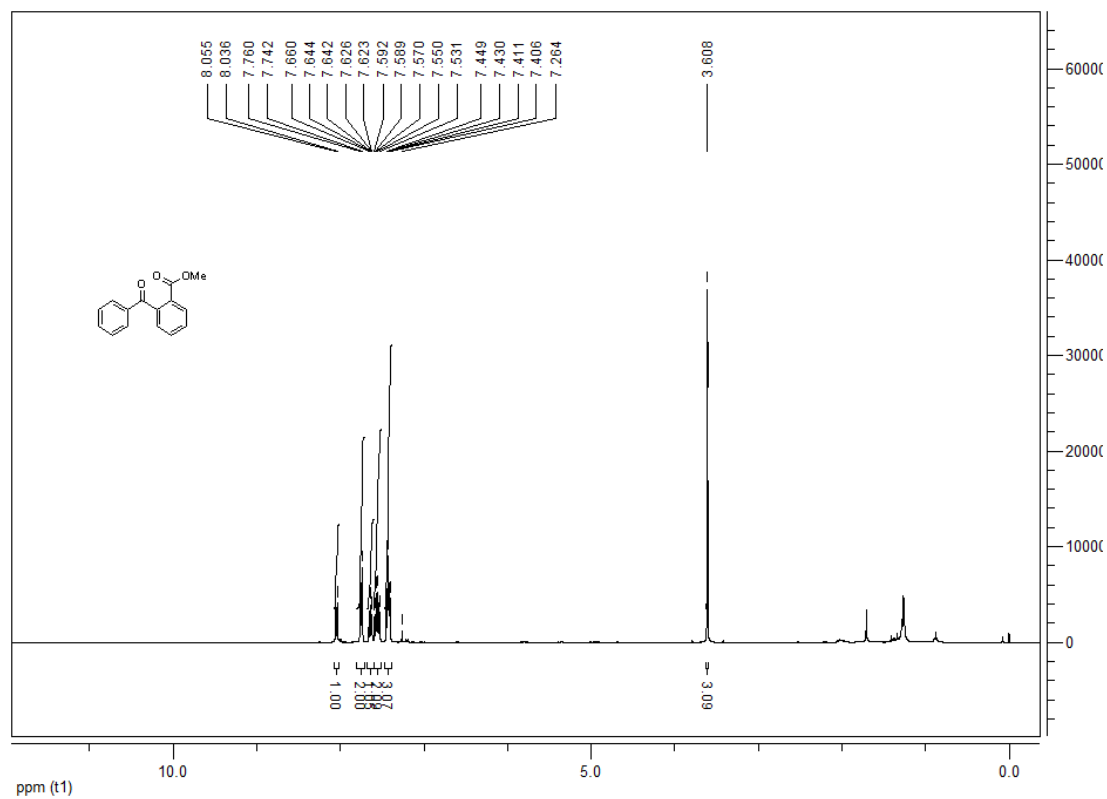

## <sup>13</sup>C NMR

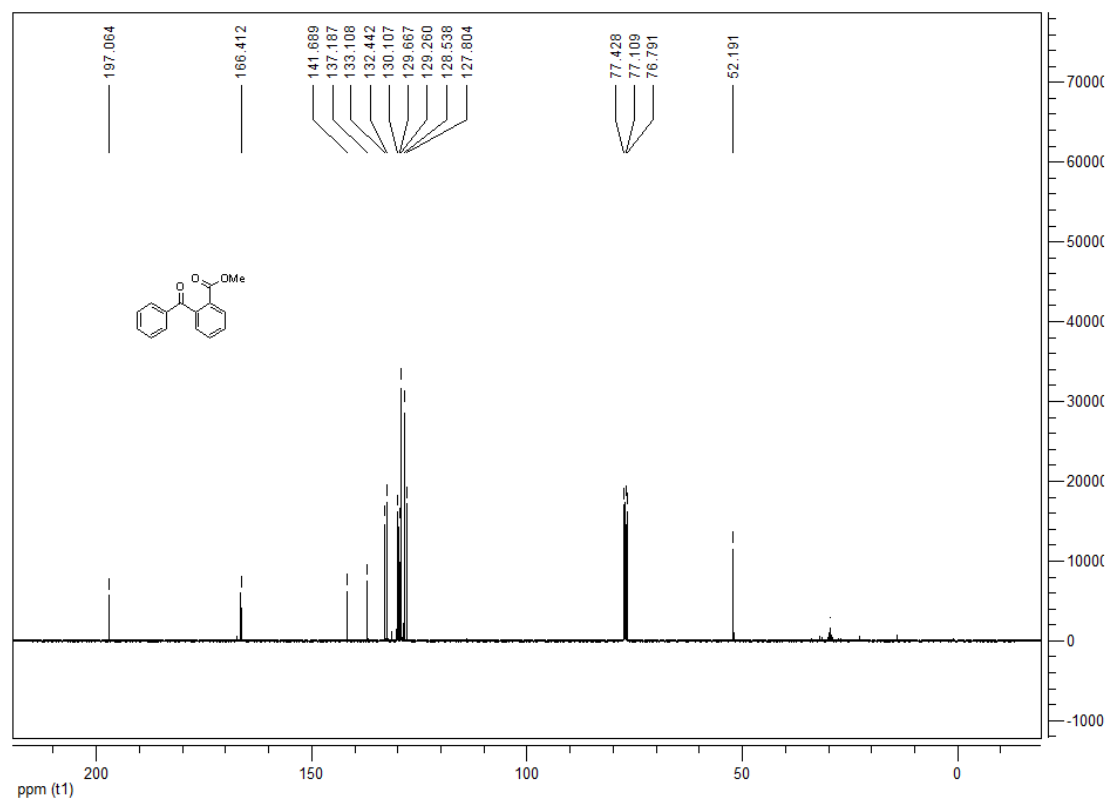



phenyl(4-(trifluoromethyl)phenyl)methanone 3fa

<sup>1</sup>H NMR

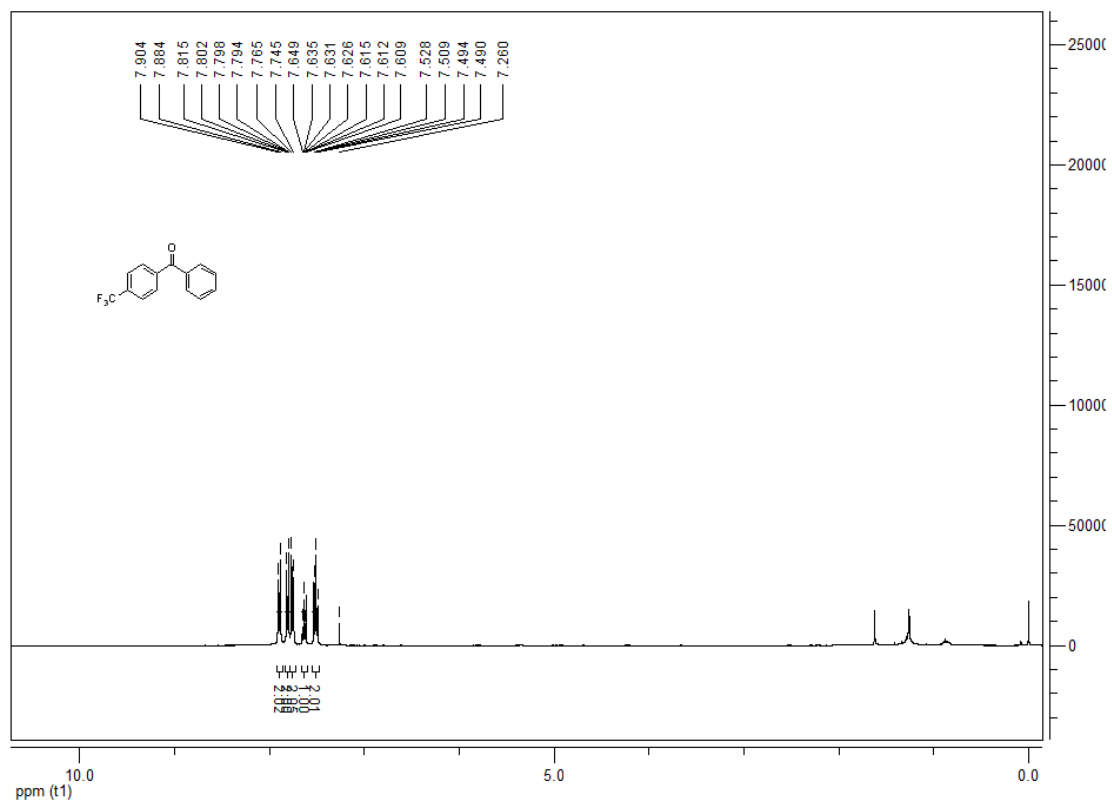

<sup>13</sup>C NMR

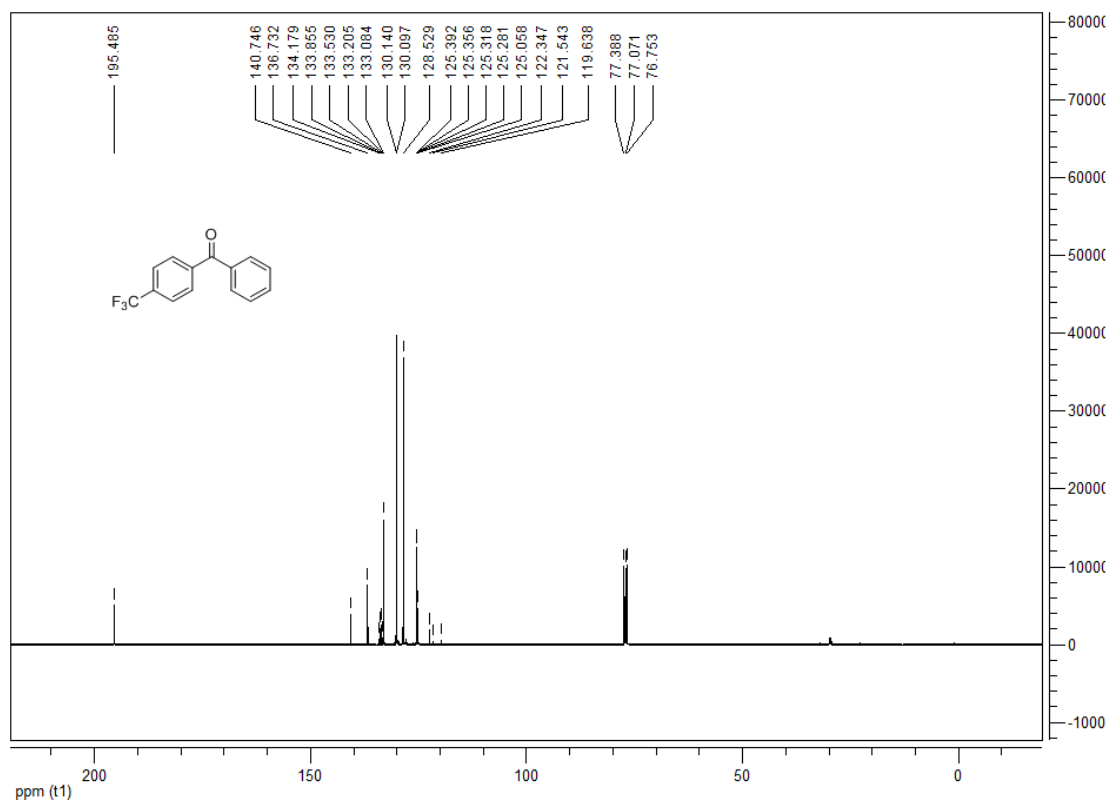

# (4-nitrophenyl)(phenyl)methanone 3ia

## $^1\text{H}$ NMR

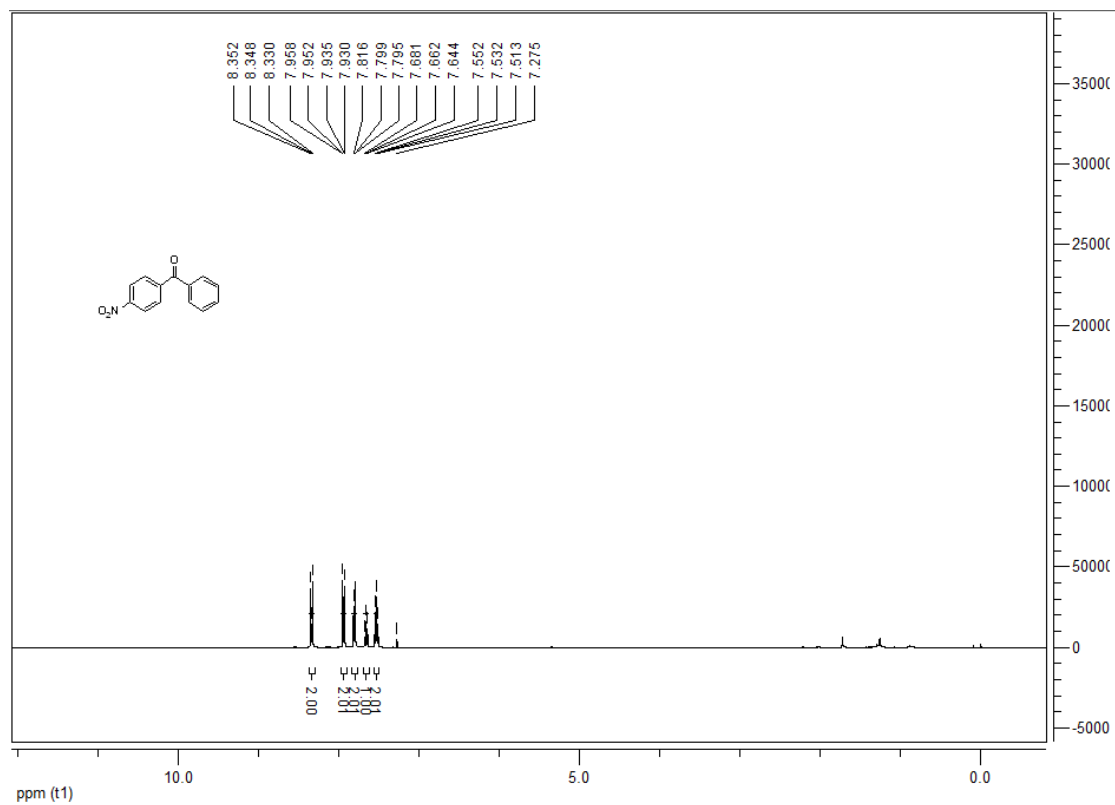

## $^{13}\text{C}$ NMR

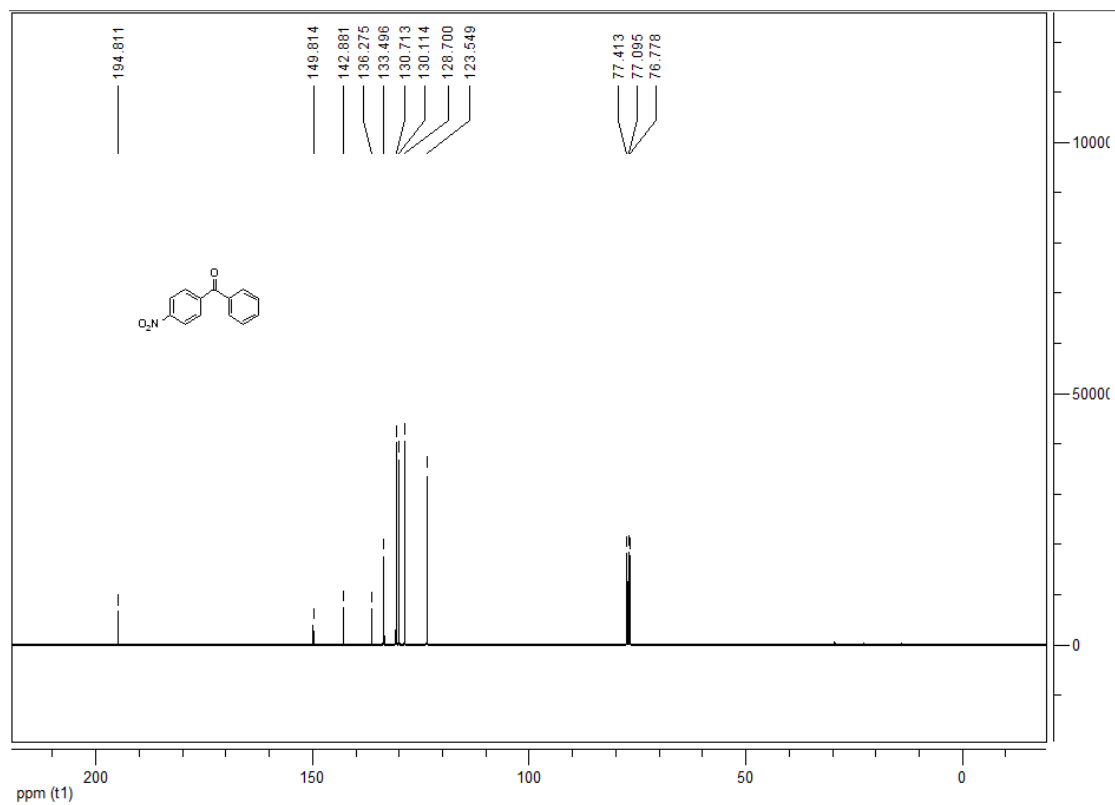

# tert-butyl (4-benzoylphenyl)carbamate 3la

## <sup>1</sup>H NMR

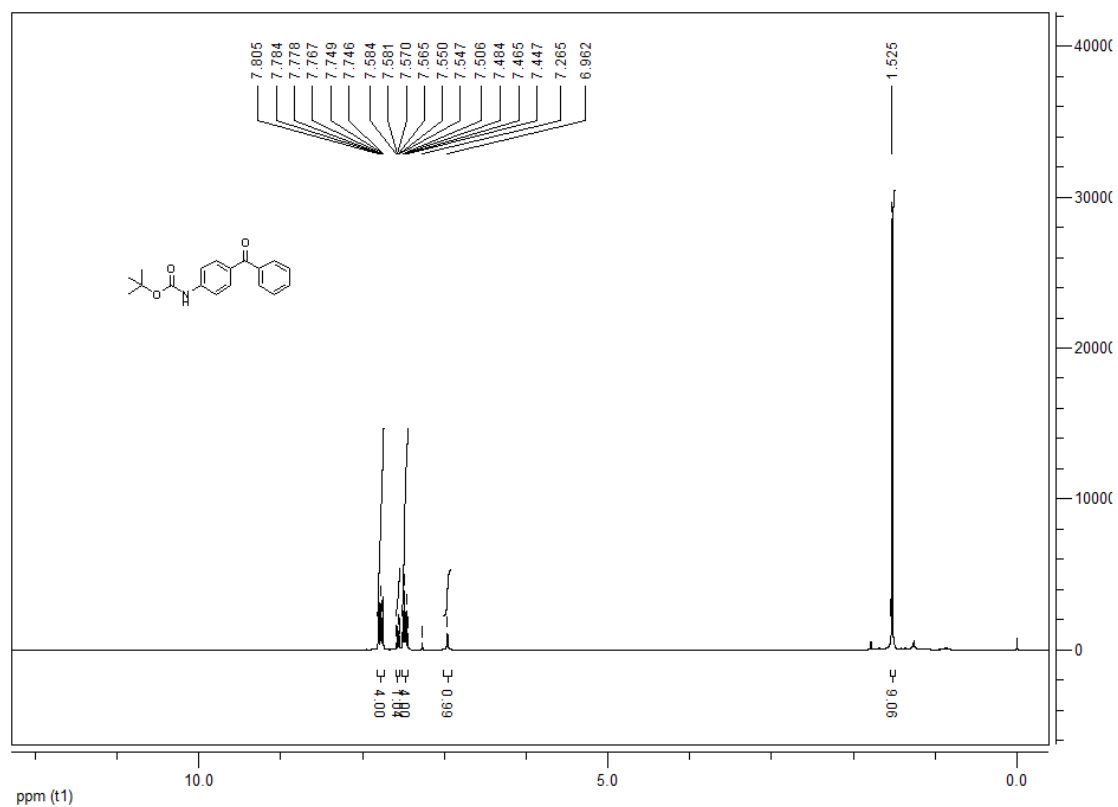

## <sup>13</sup>C NMR

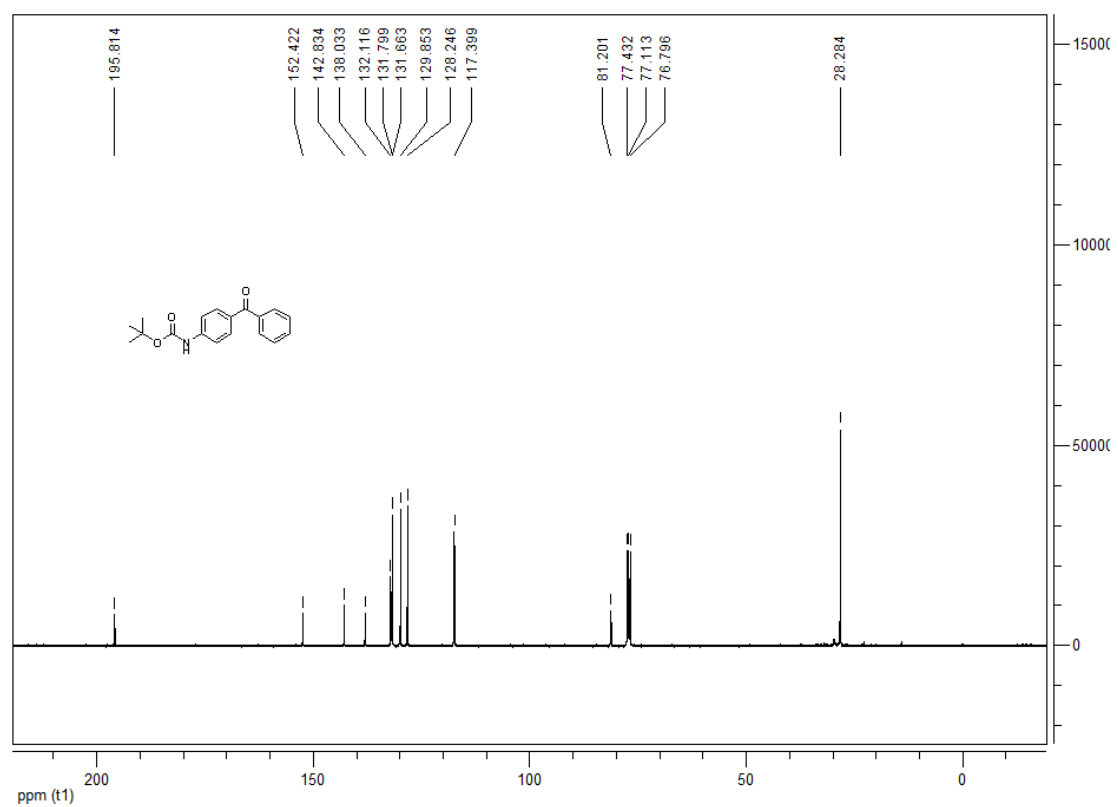

# furan-2-yl(phenyl)methanone 3ma

## <sup>1</sup>H NMR

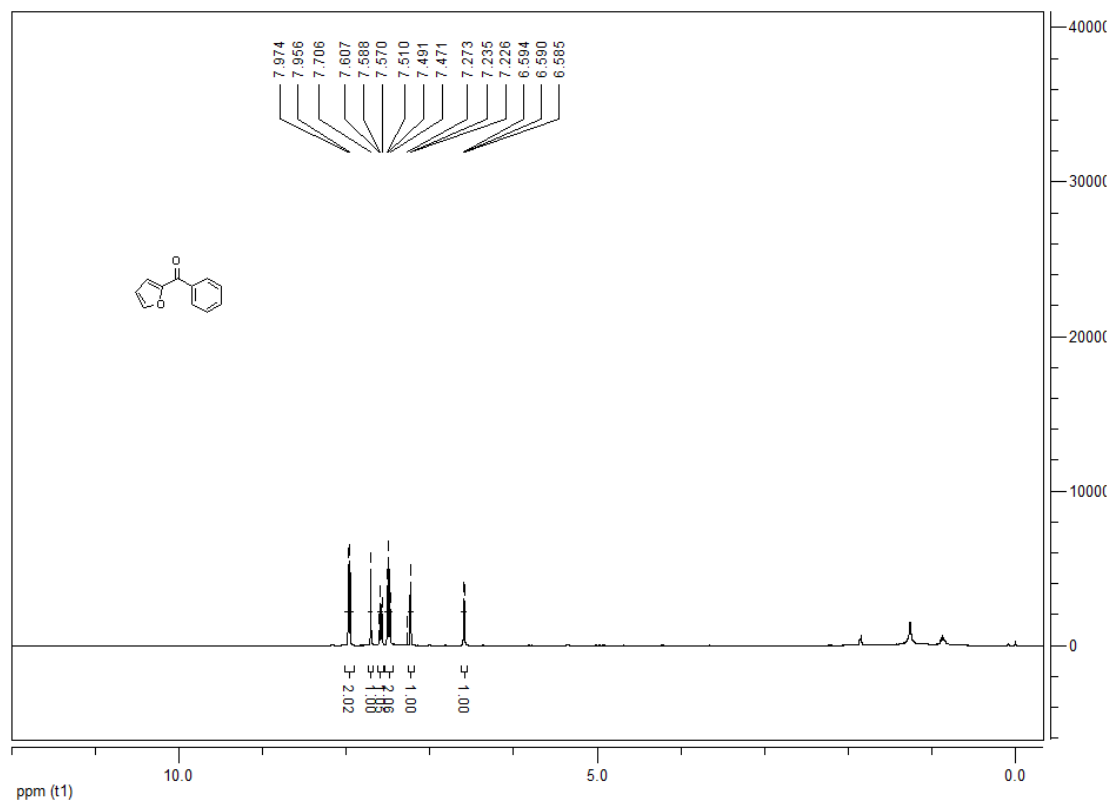

## <sup>13</sup>C NMR

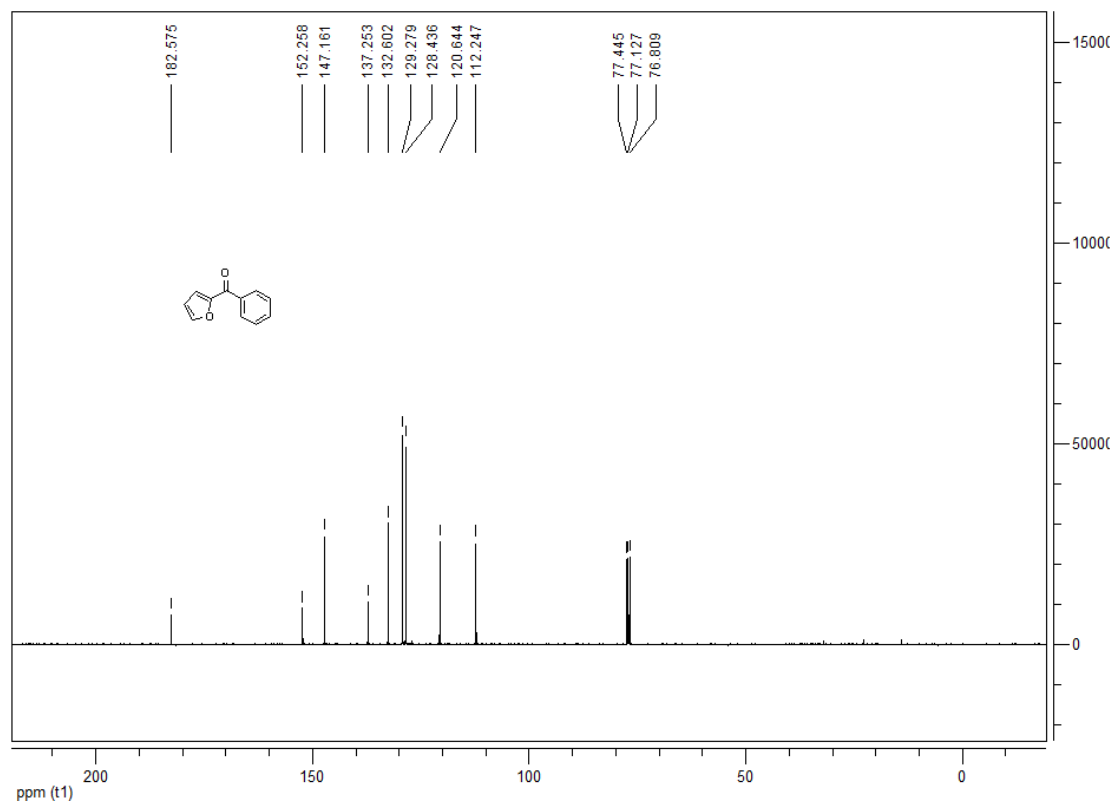

phenyl(thiophen-2-yl)methanone 3na

<sup>1</sup>H NMR

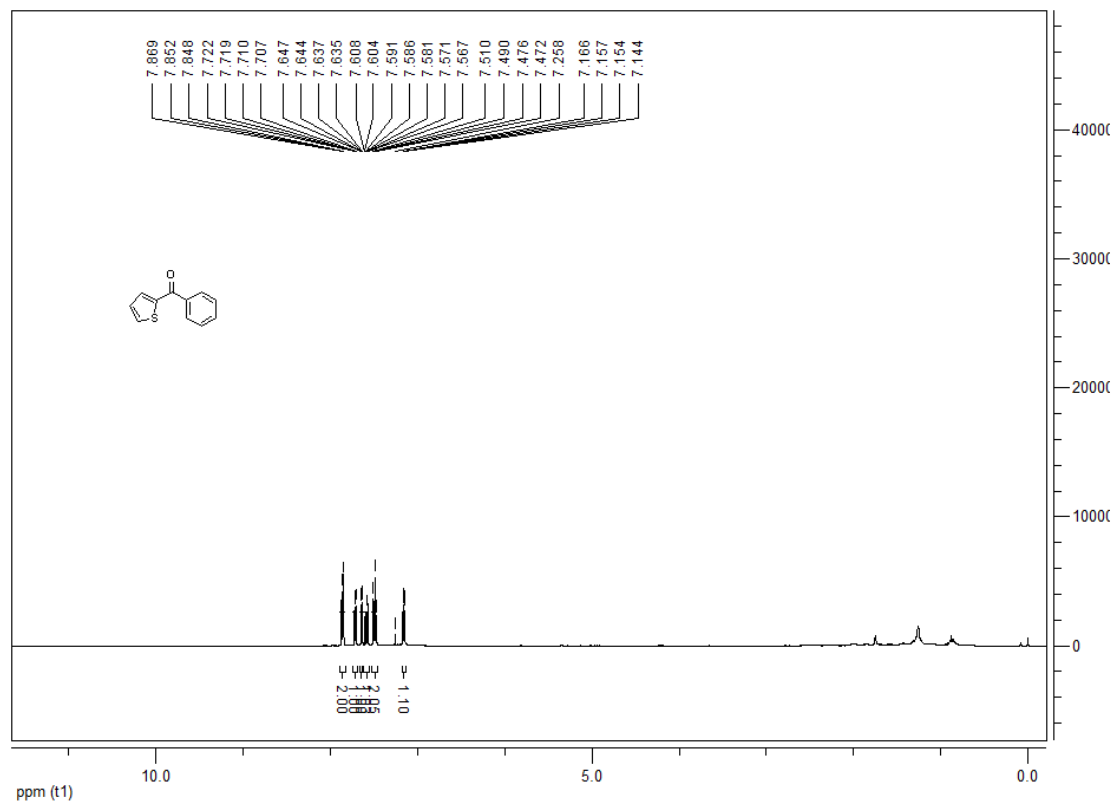

<sup>13</sup>C NMR

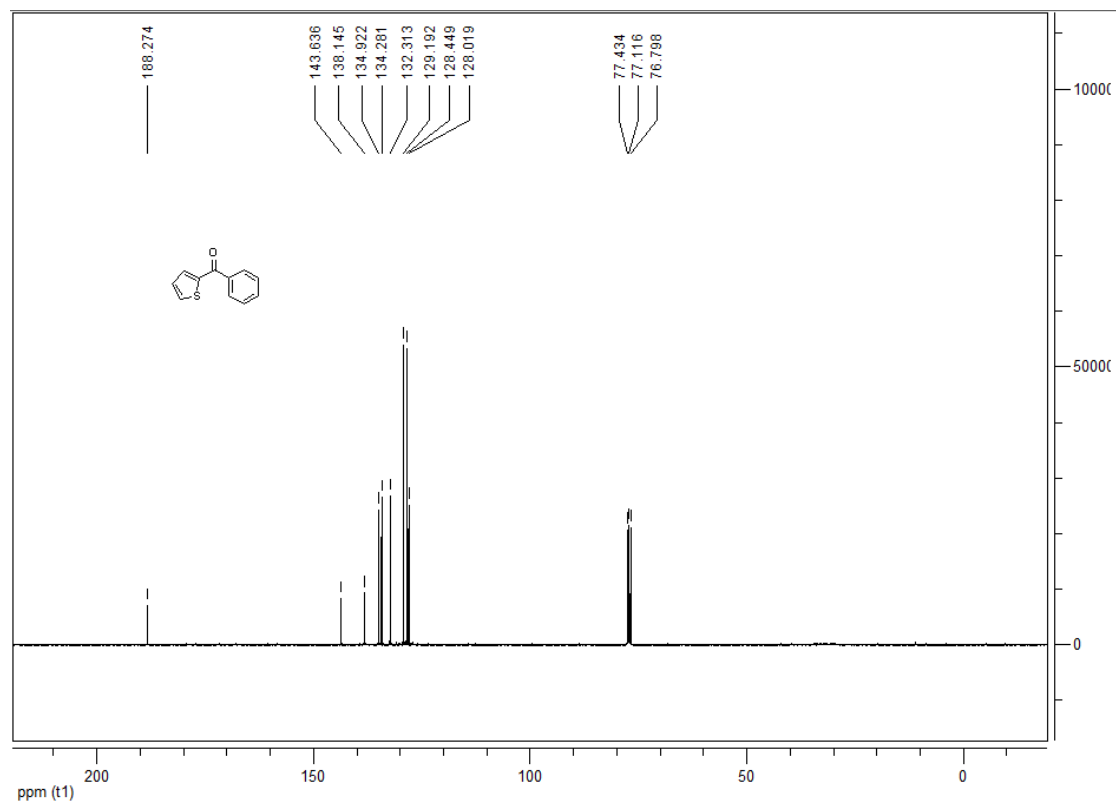

# (E)-chalcone 3oa

## <sup>1</sup>H NMR

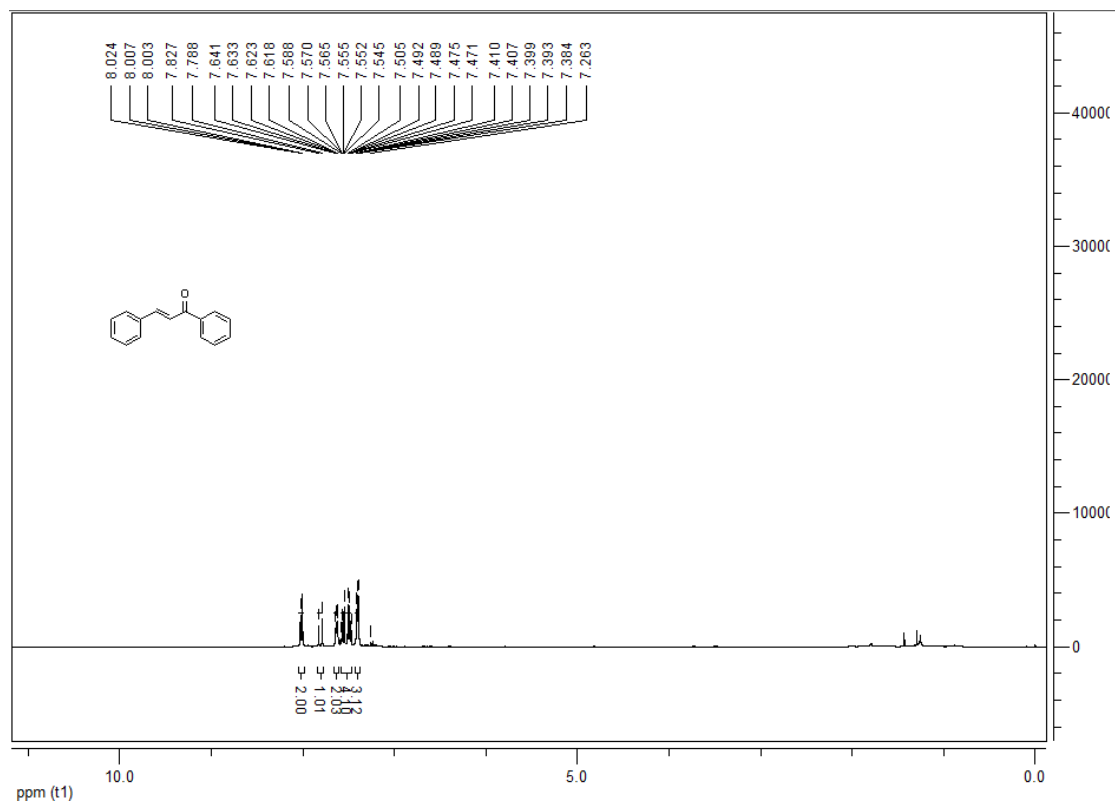

## <sup>13</sup>C NMR

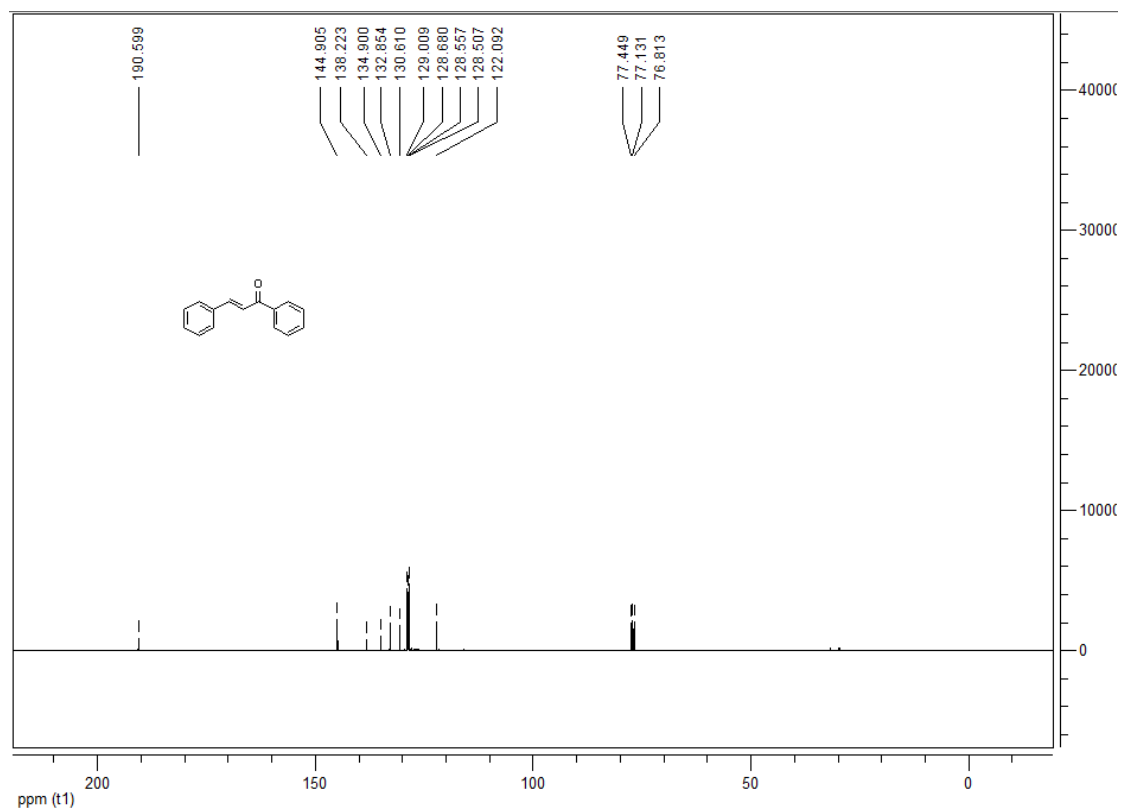

# 1,3-diphenylpropan-1-one 3pa

## <sup>1</sup>H NMR

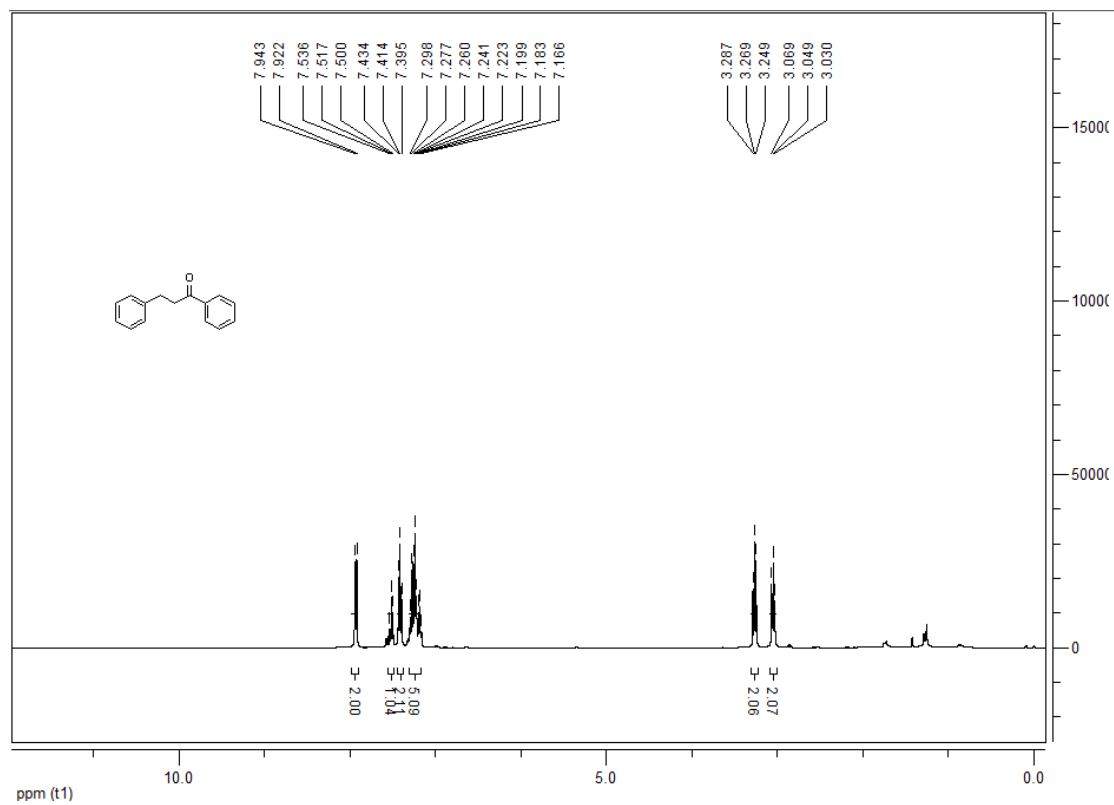

## <sup>13</sup>C NMR

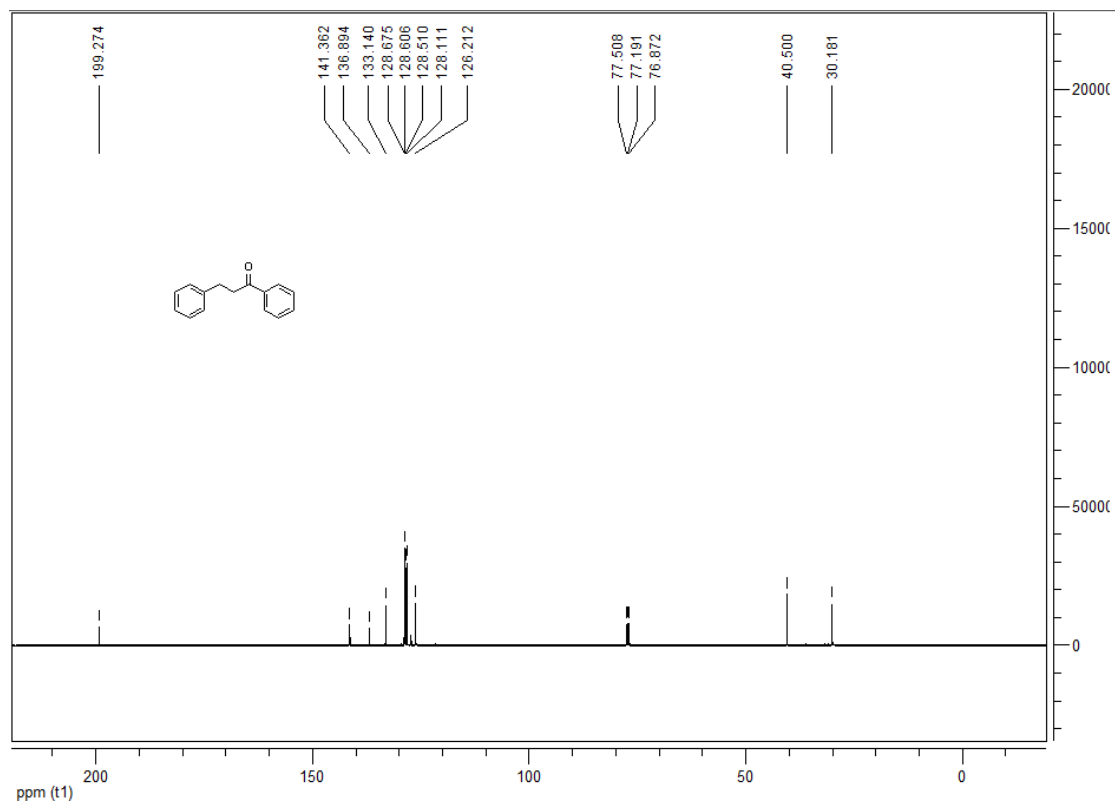

# 1-phenyloctadecan-1-one 3qa

## <sup>1</sup>H NMR

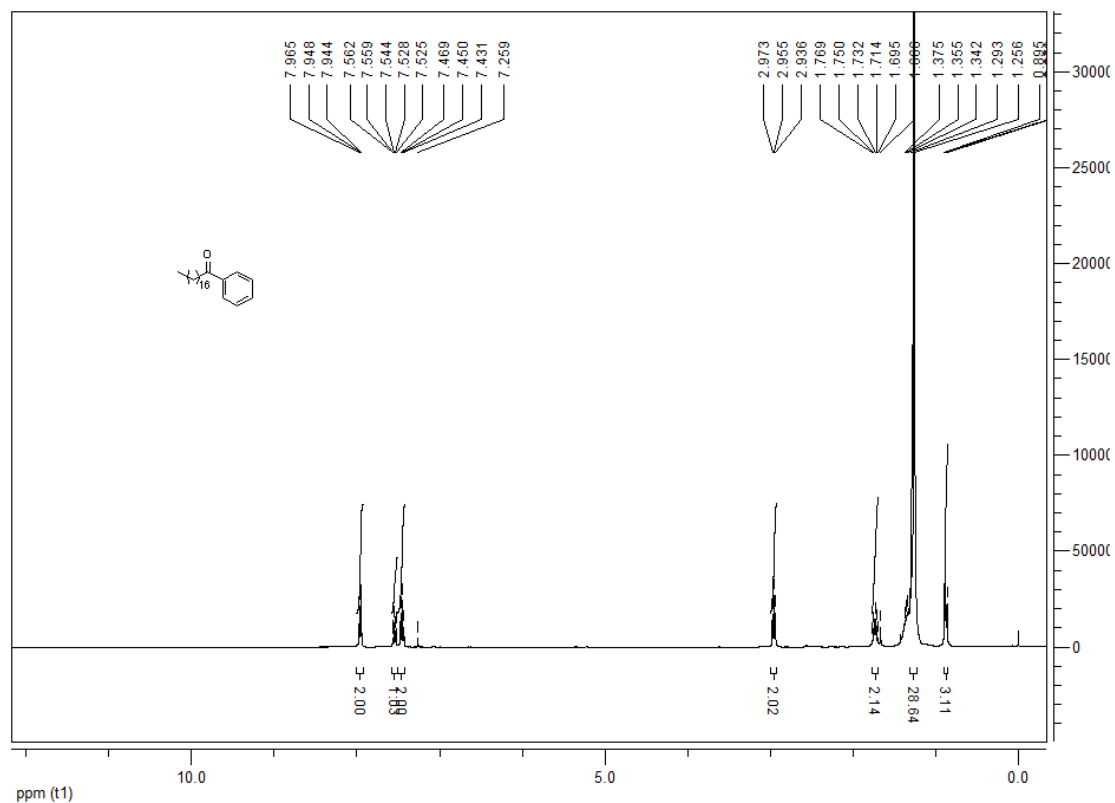

## <sup>13</sup>C NMR

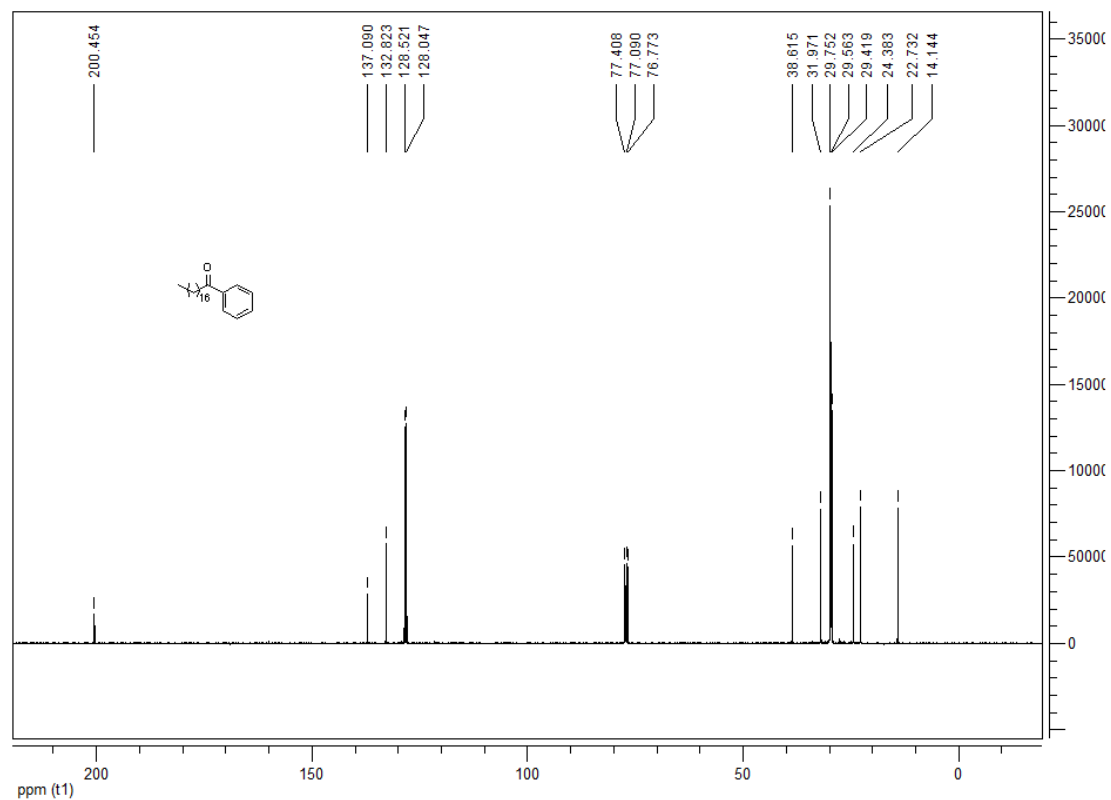



# 1-(o-tolyl)octadecan-1-one 3qi

## <sup>1</sup>H NMR

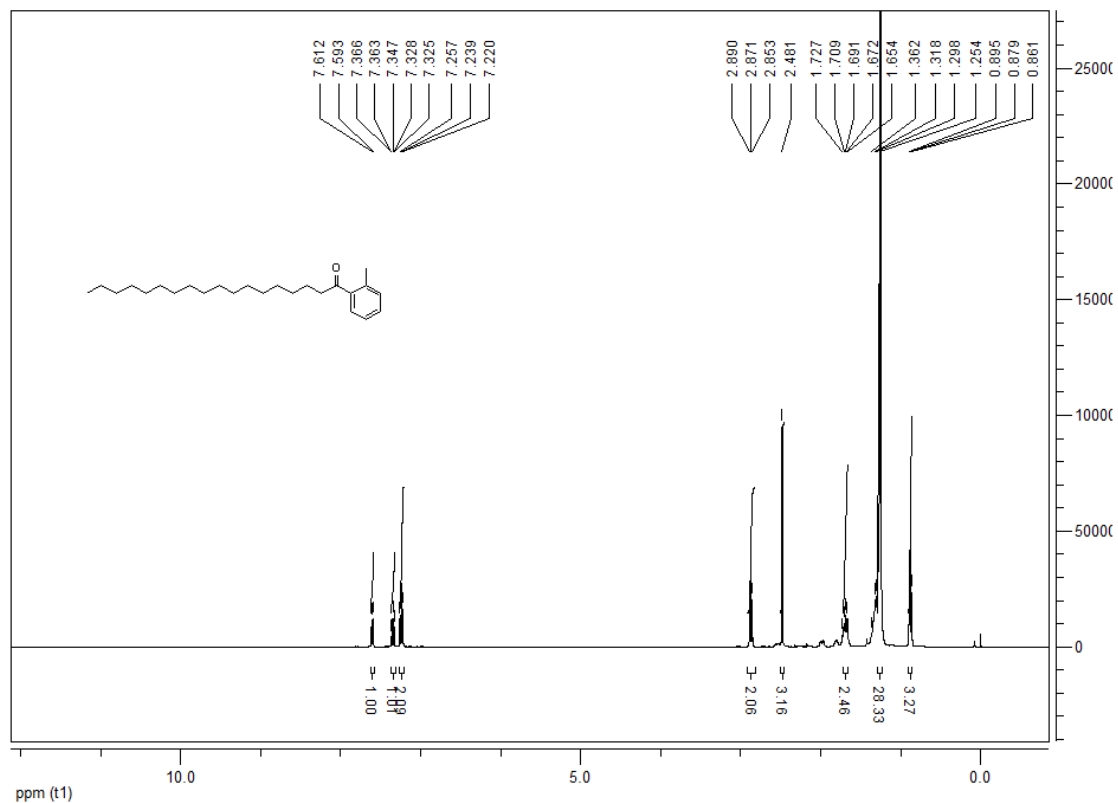

## <sup>13</sup>C NMR

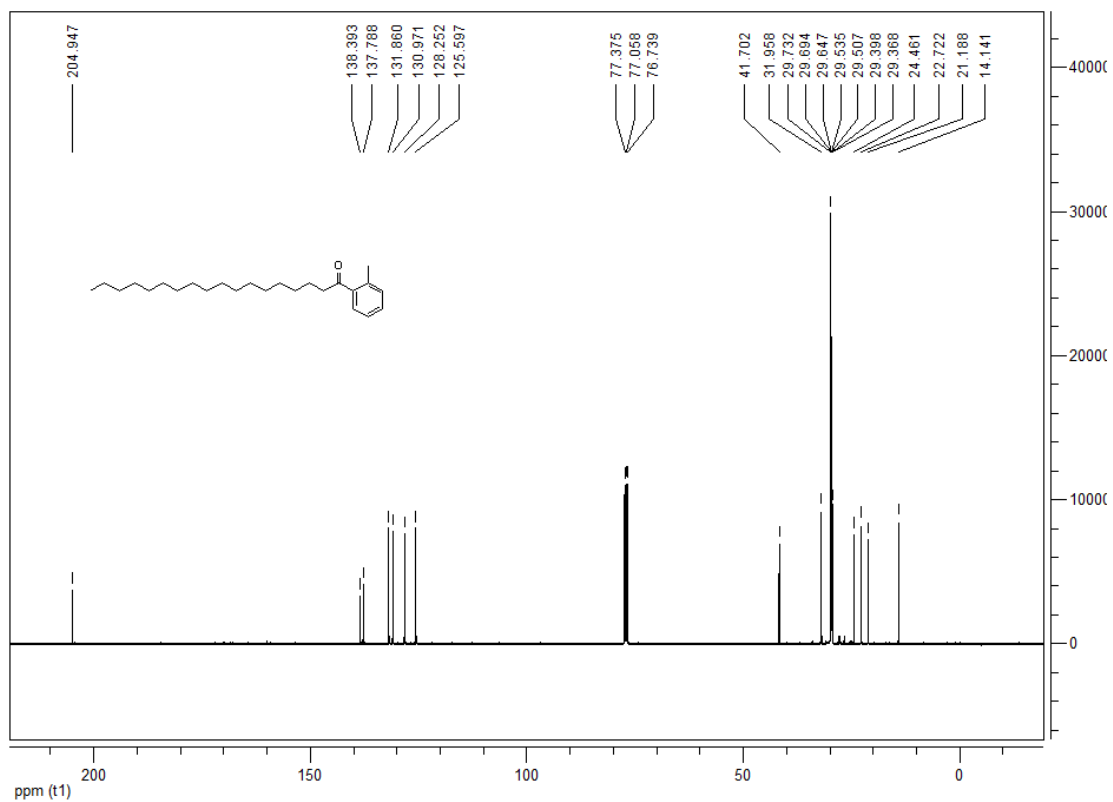

# 1-(2-ethylphenyl)octadecan-1-one 3qj

## <sup>1</sup>H NMR

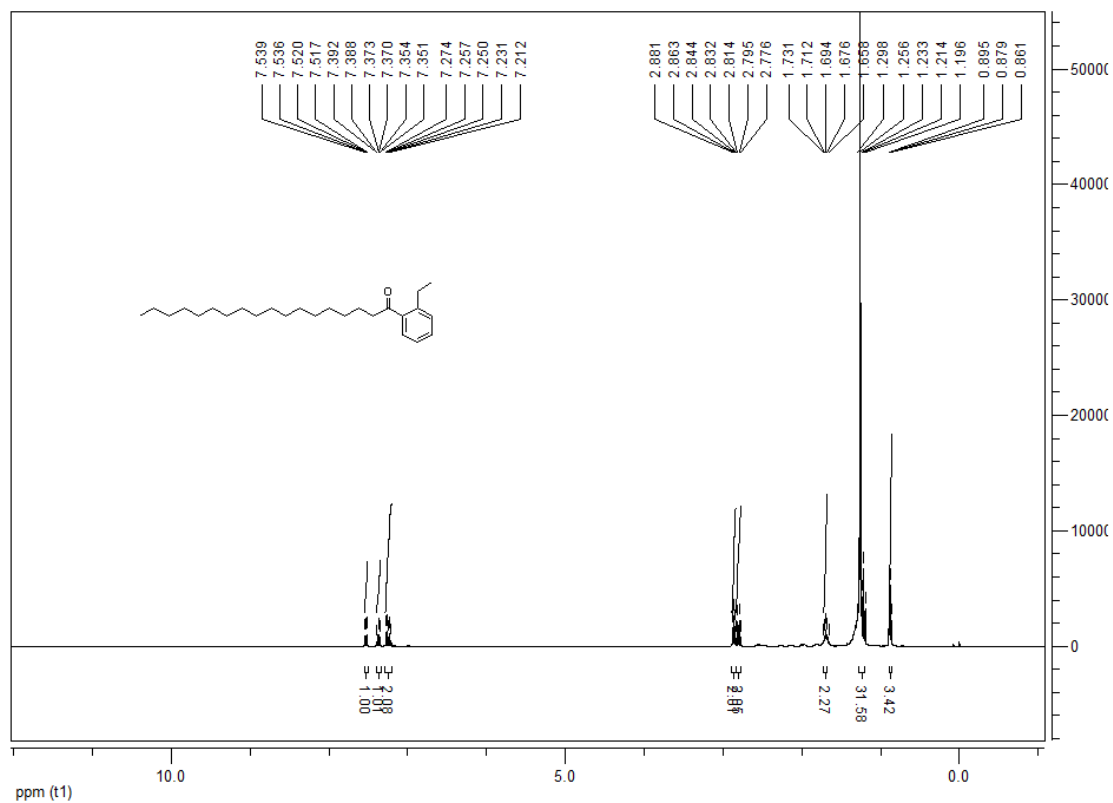

## <sup>13</sup>C NMR

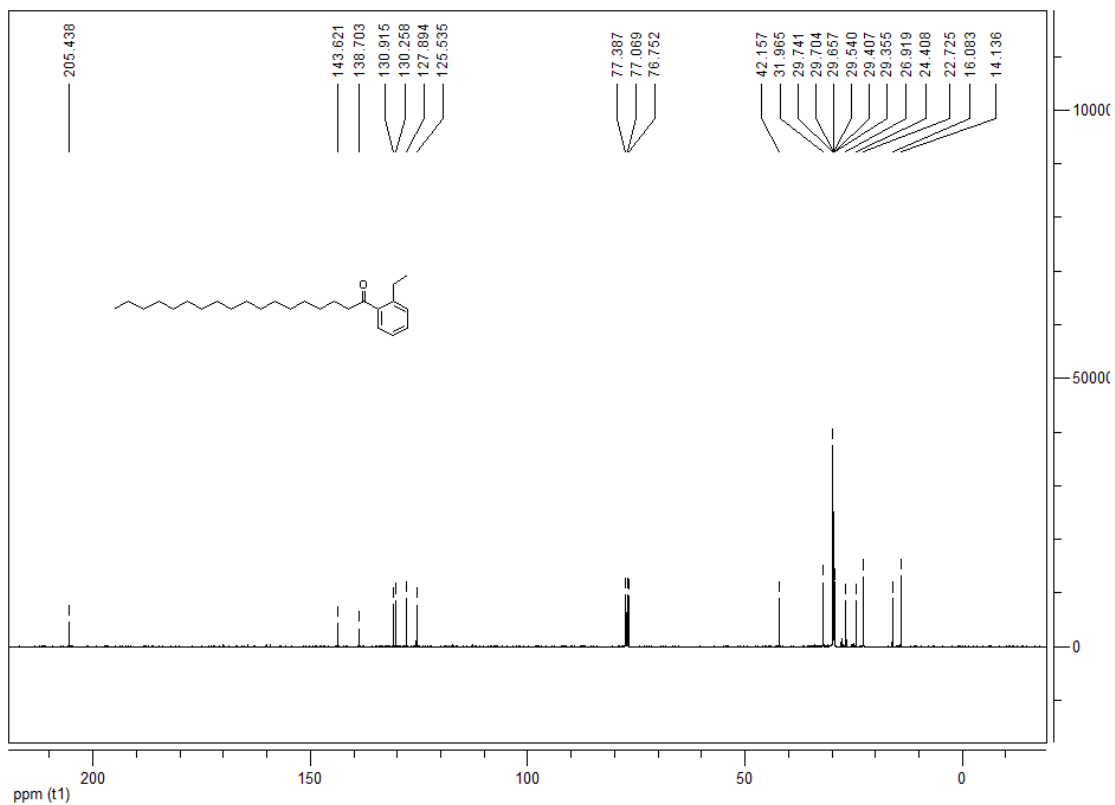

cyclohexyl(phenyl)methanone 3ra

$^1\text{H}$  NMR

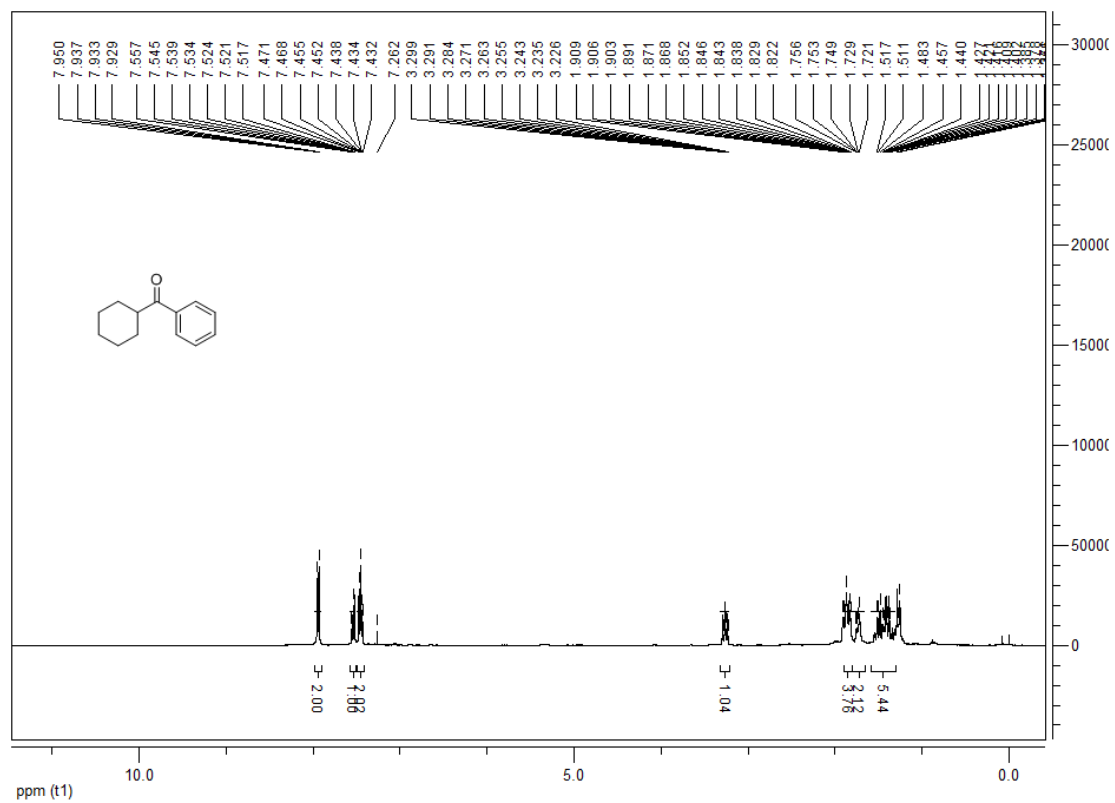

$^{13}\text{C}$  NMR

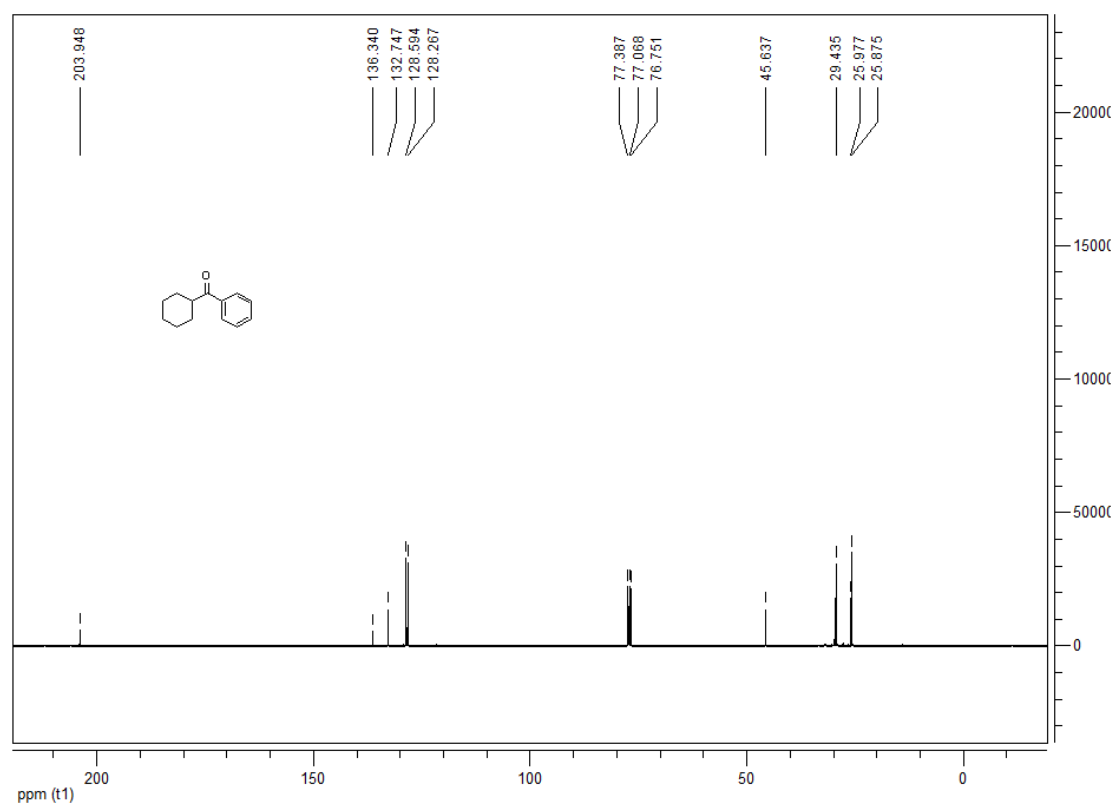

cyclohexyl(o-tolyl)methanone 3ri

<sup>1</sup>H NMR

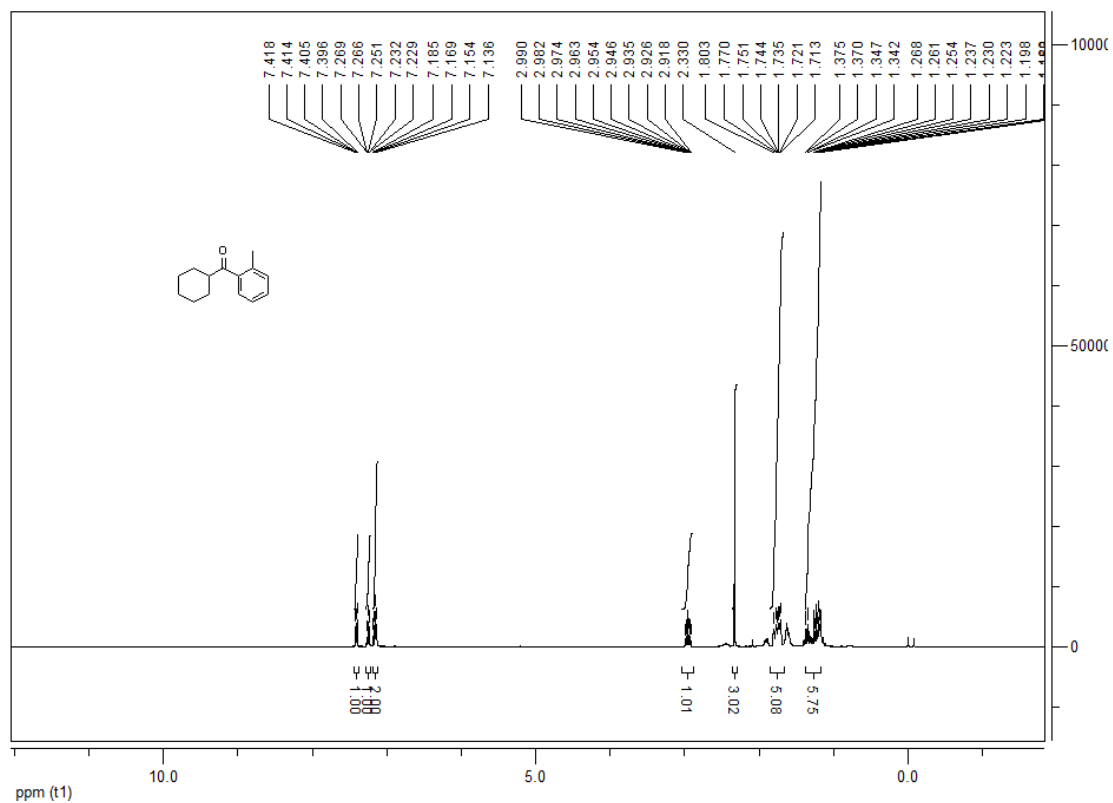

<sup>13</sup>C NMR

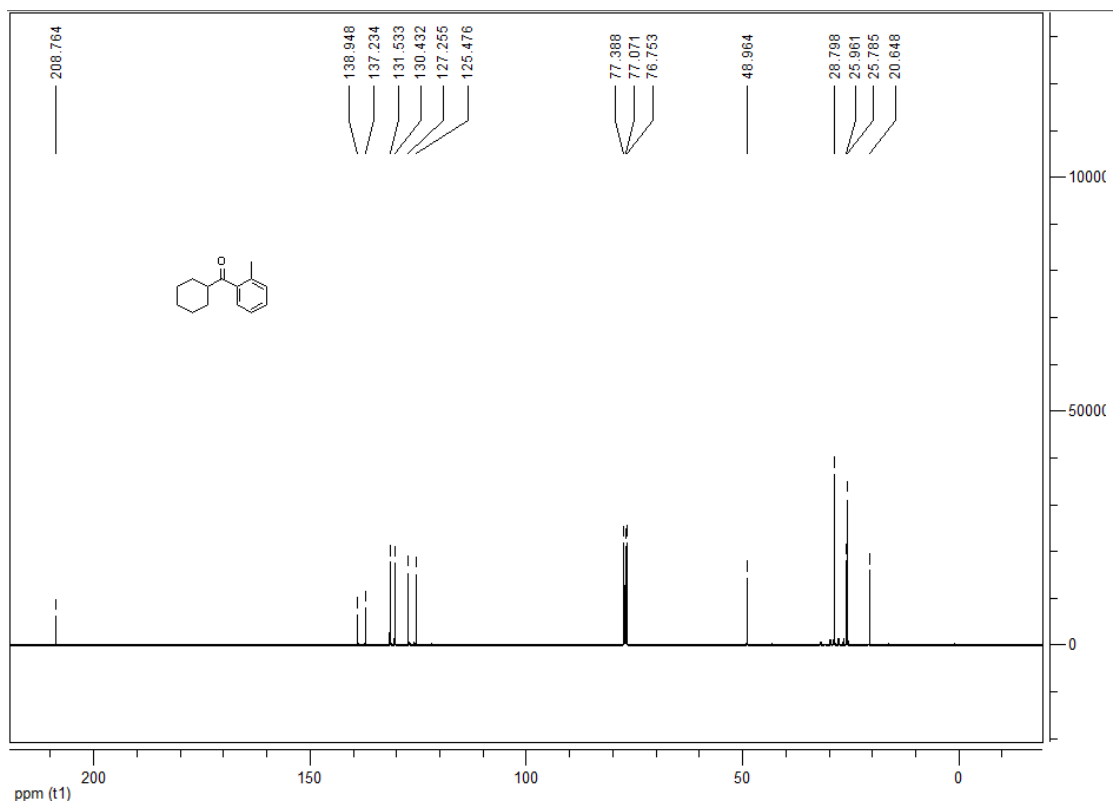

**(3r,5r,7r)-adamantan-1-yl(phenyl)methanone 3sa**

**<sup>1</sup>H NMR**

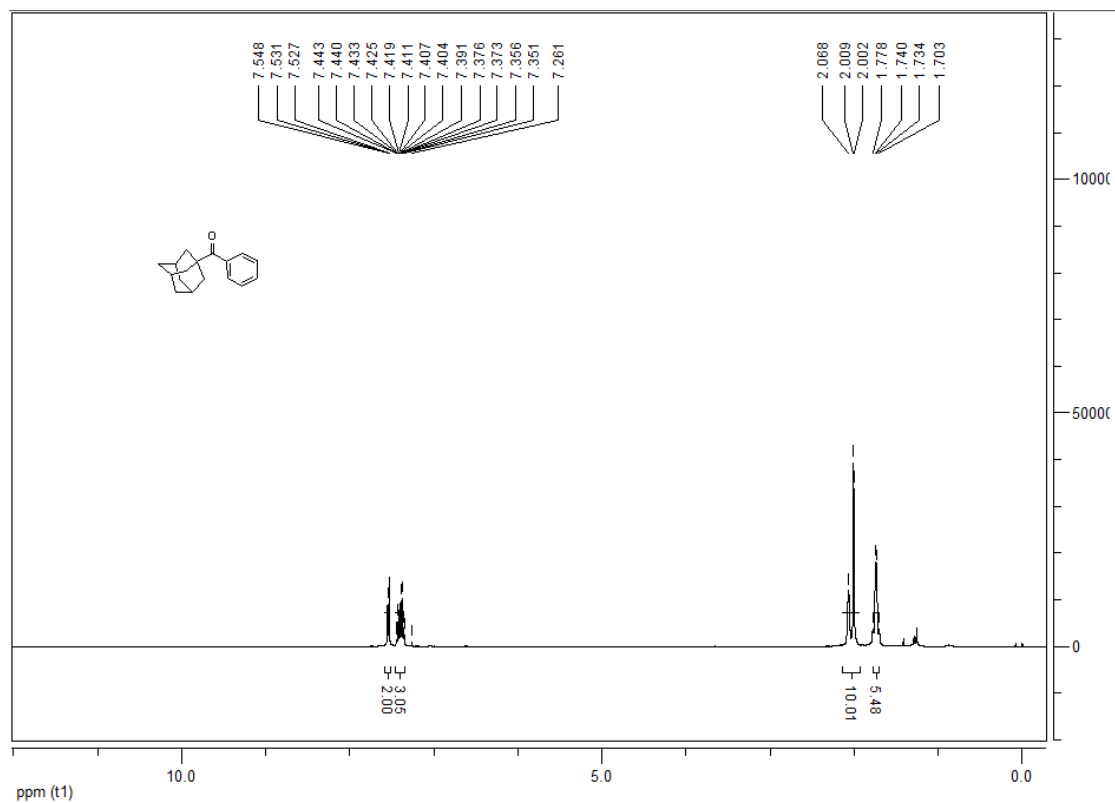

**<sup>13</sup>C NMR**

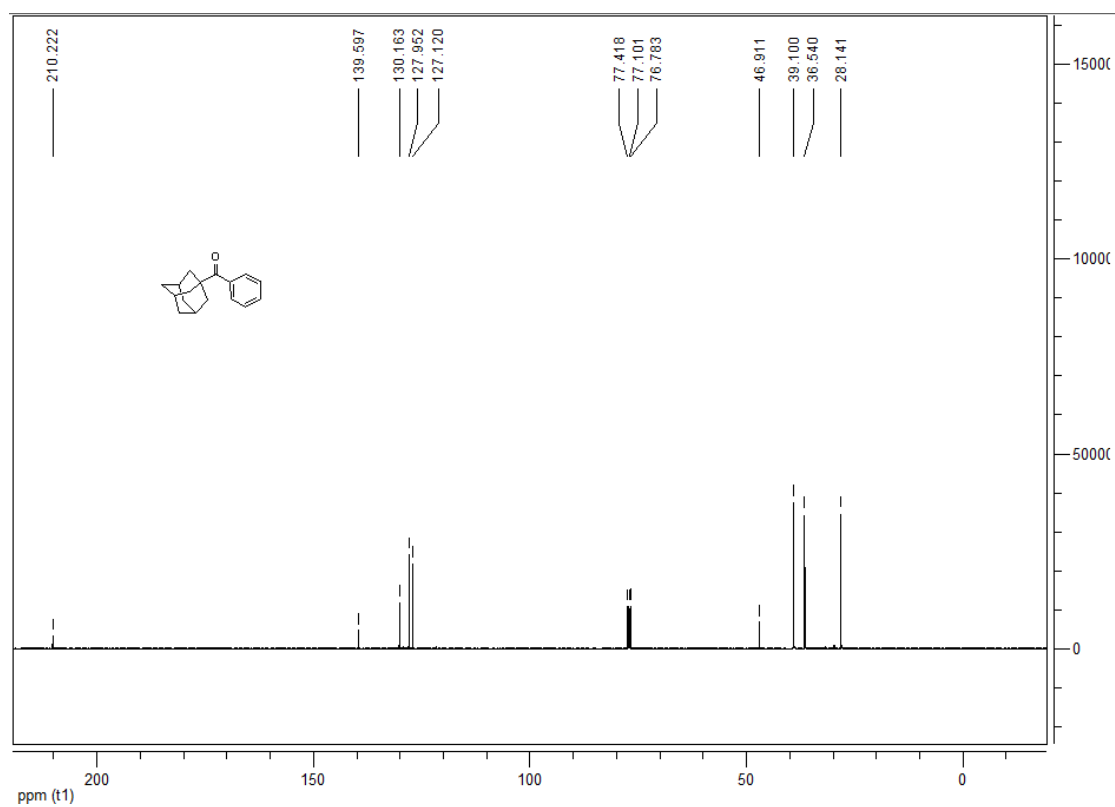

**(3*r*,5*r*,7*r*)-adamantan-1-yl(*o*-tolyl)methanone 3ui**

**<sup>1</sup>H NMR**

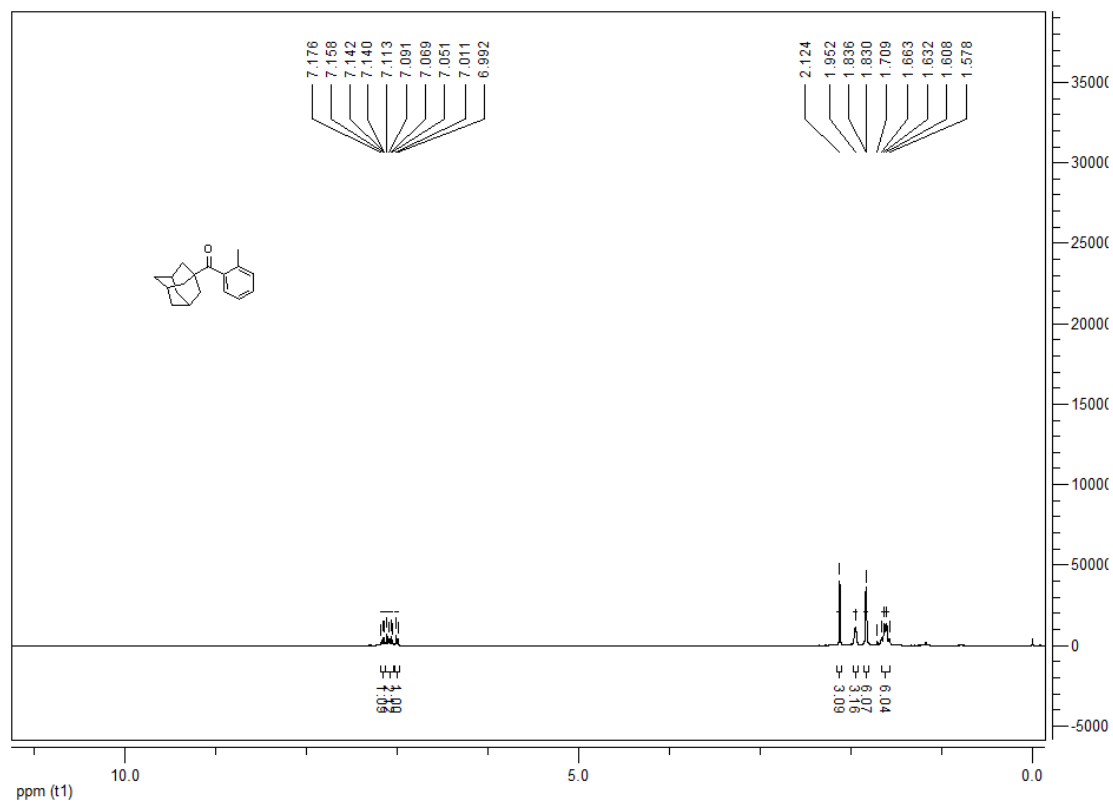

**<sup>13</sup>C NMR**

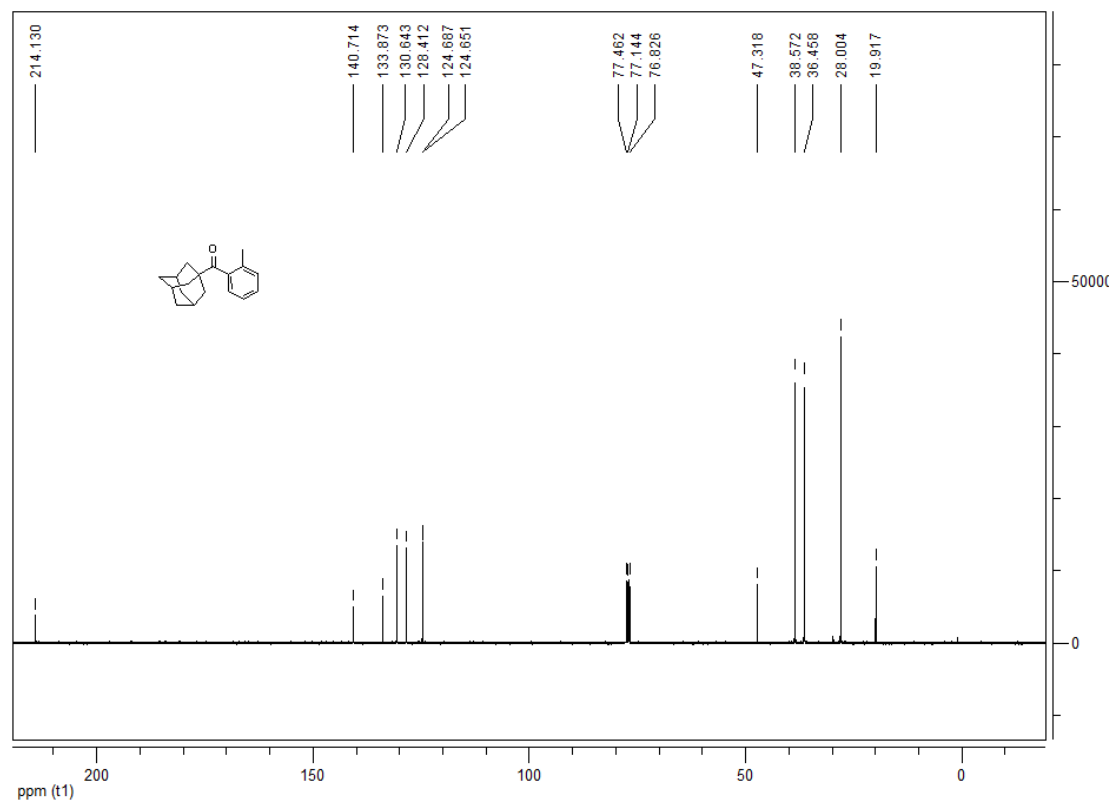

# (3r,5r,7r)-adamantan-1-yl(2-ethylphenyl)methanone 3uj

## <sup>1</sup>H NMR

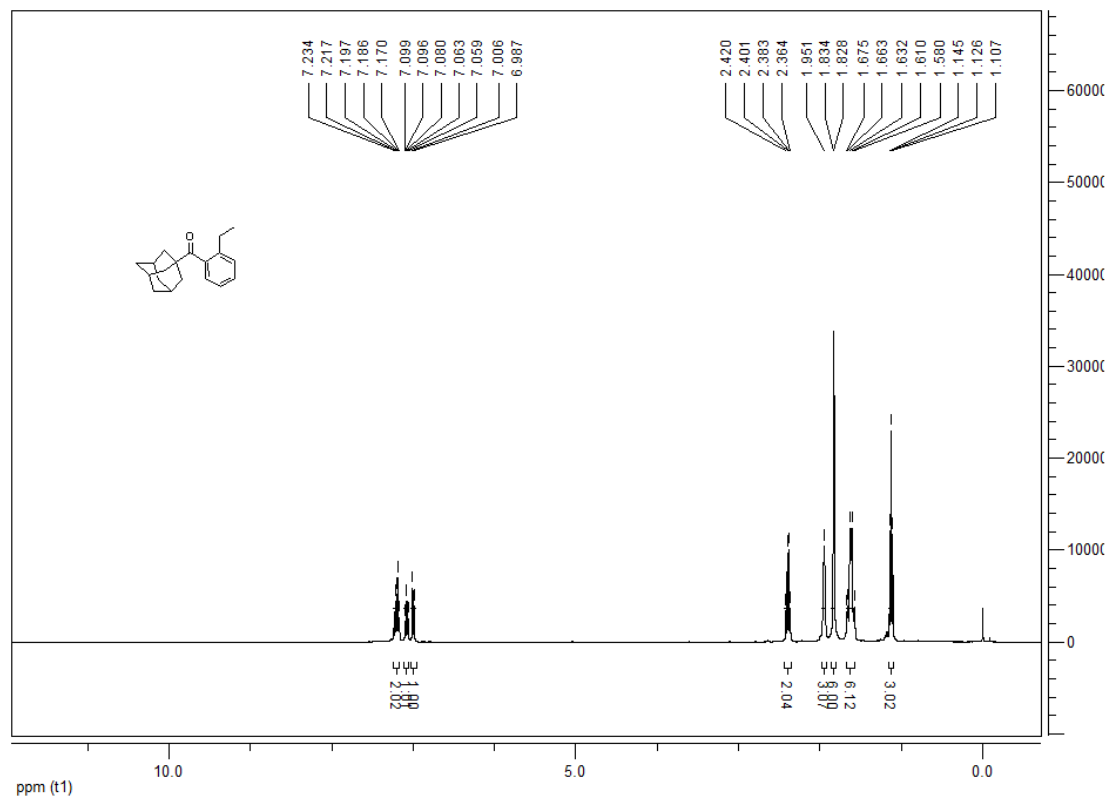

## <sup>13</sup>C NMR

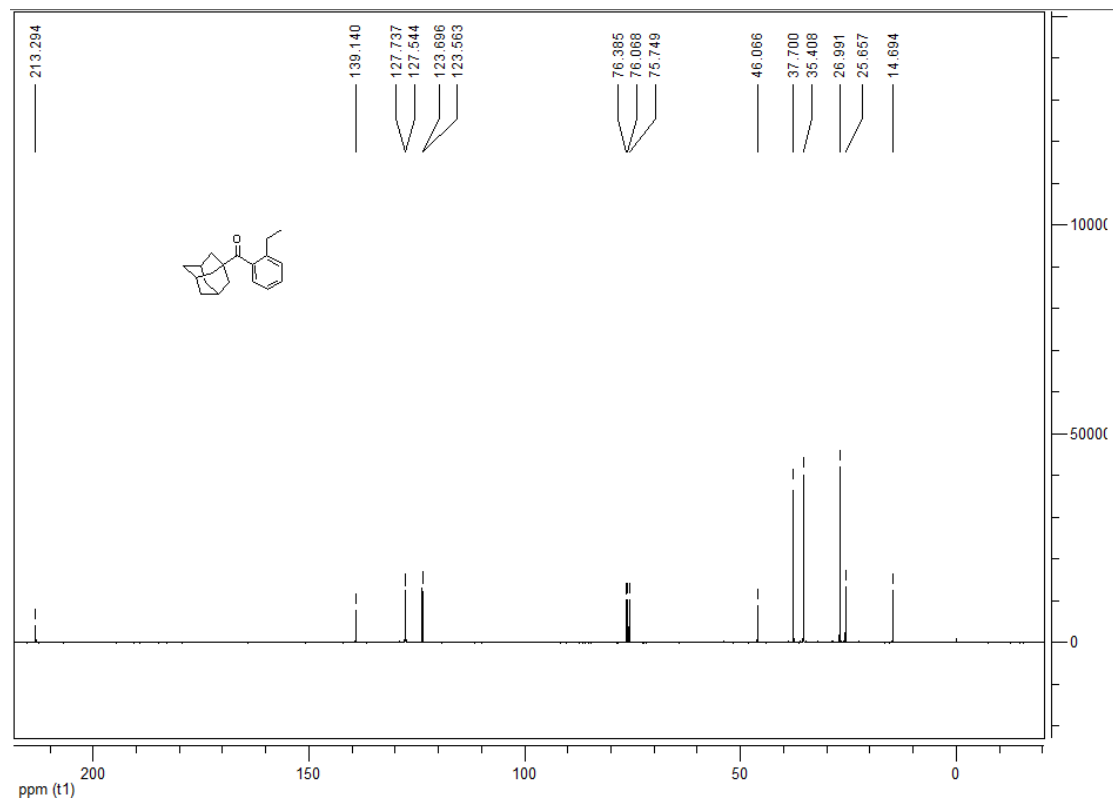

# di-*o*-tolylmethanone 3vi

## $^1\text{H}$ NMR

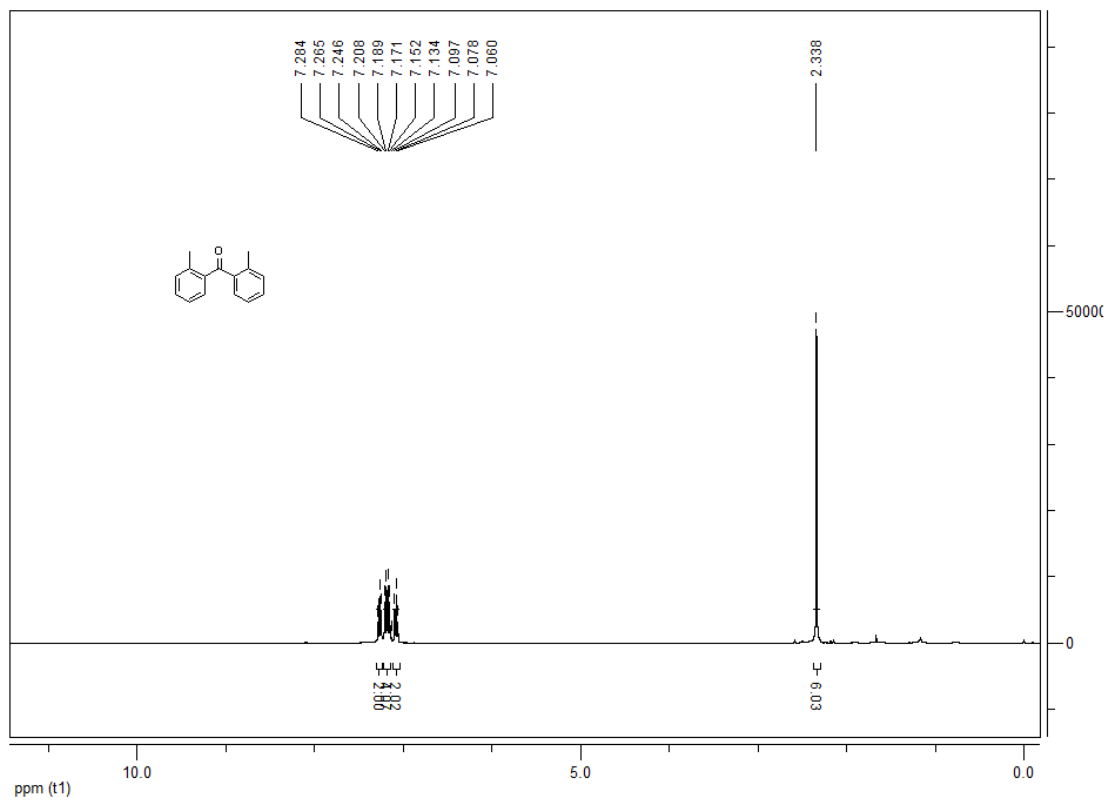

## $^{13}\text{C}$ NMR

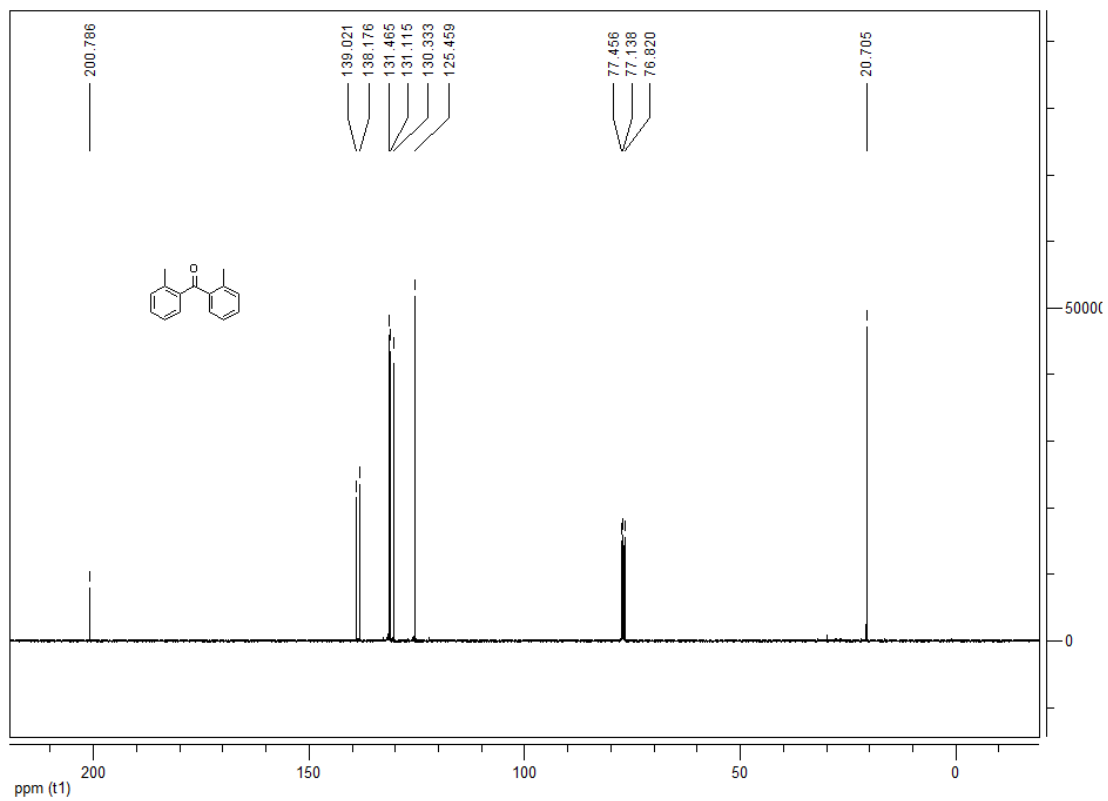



**(2-ethylphenyl)(o-tolyl)methanone 3vj**

**<sup>1</sup>H NMR**

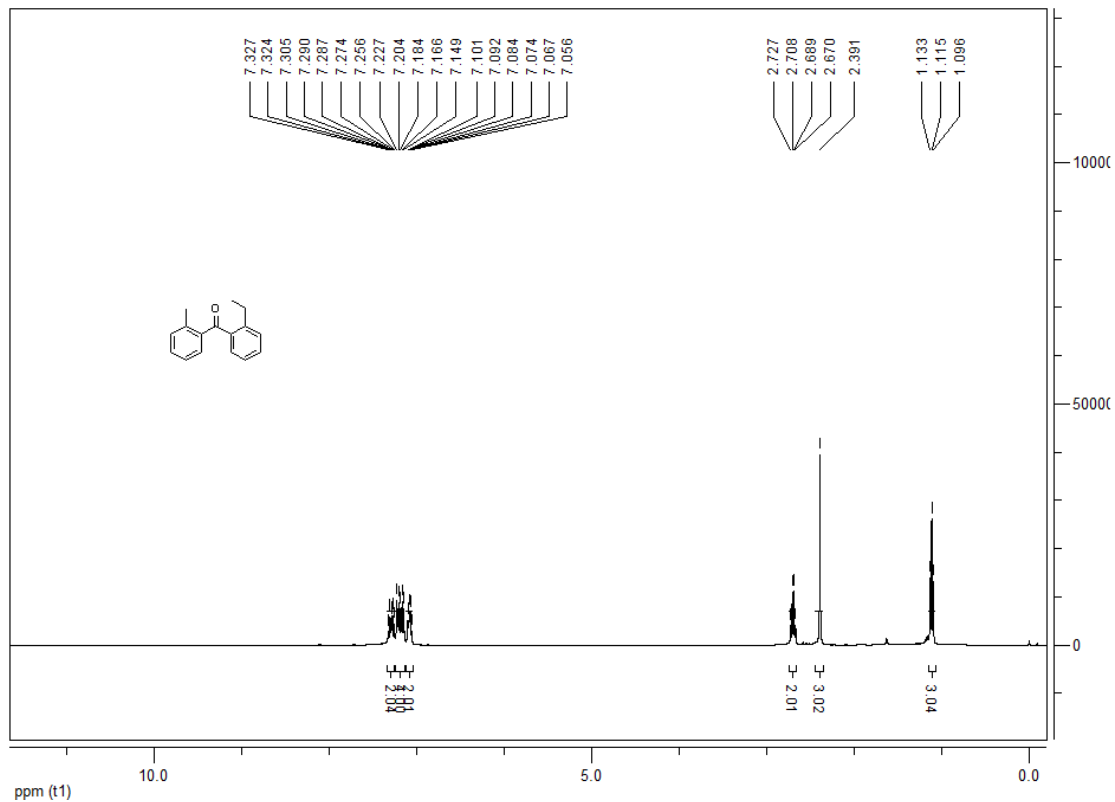

**<sup>13</sup>C NMR**

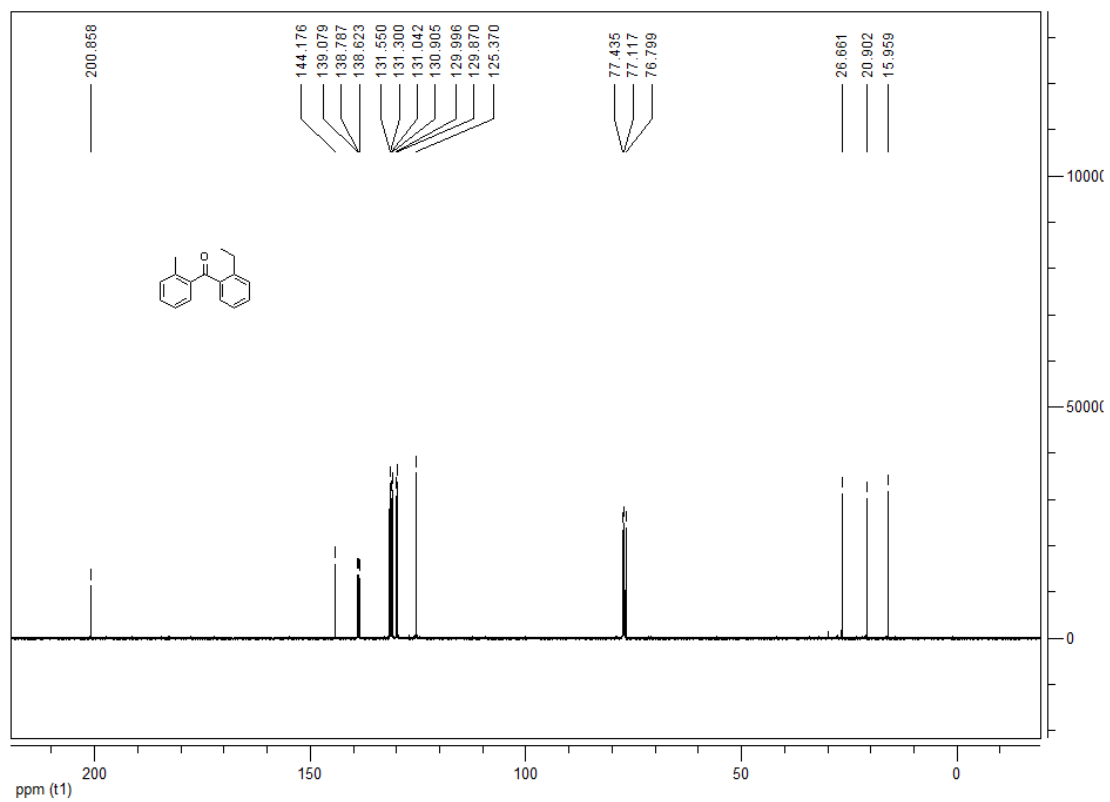

# 4'-methoxy-N-phenyl-N-tosyl-[1,1'-biphenyl]-4-carboxamide 4

## <sup>1</sup>H NMR

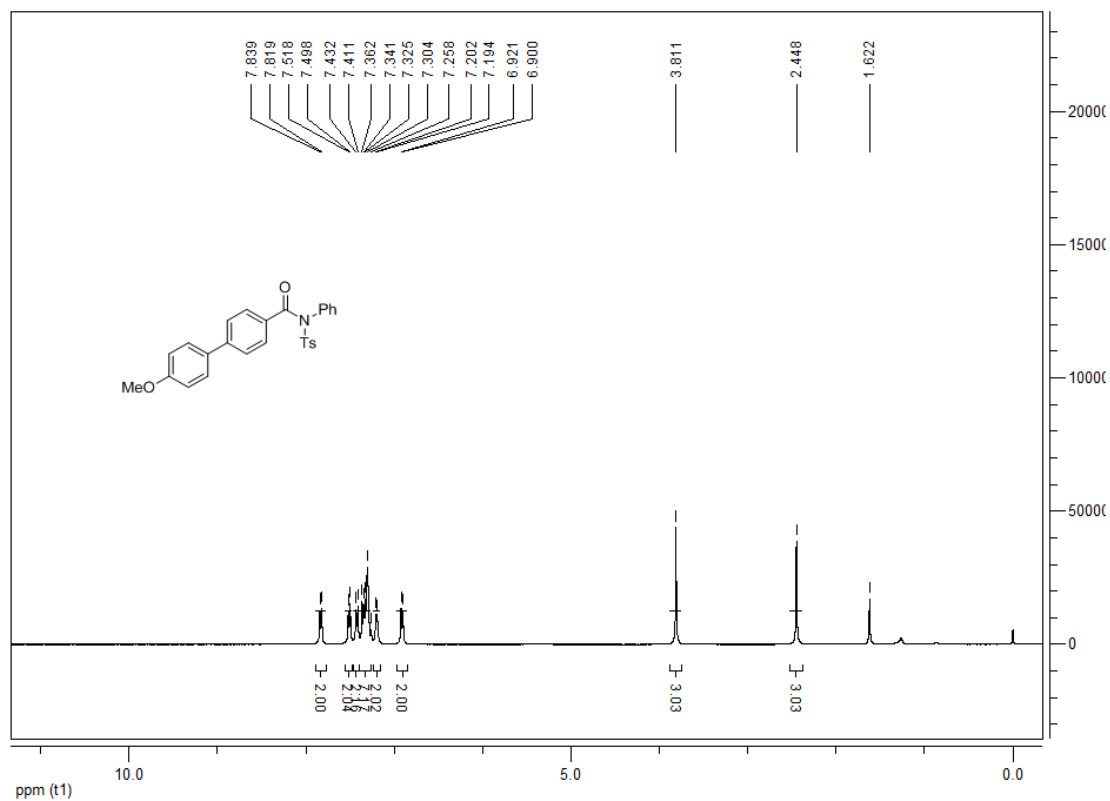

## <sup>13</sup>C NMR

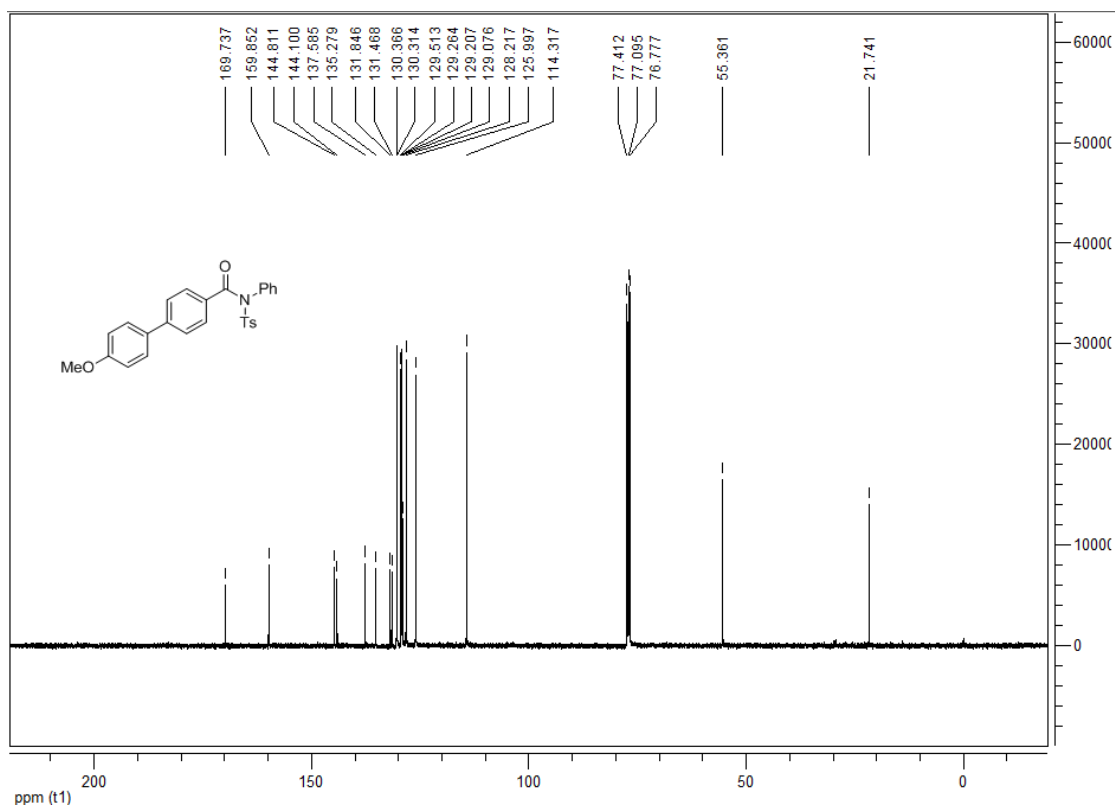

# (4'-methoxy-[1,1'-biphenyl]-4-yl)(p-tolyl)methanone 5

## <sup>1</sup>H NMR

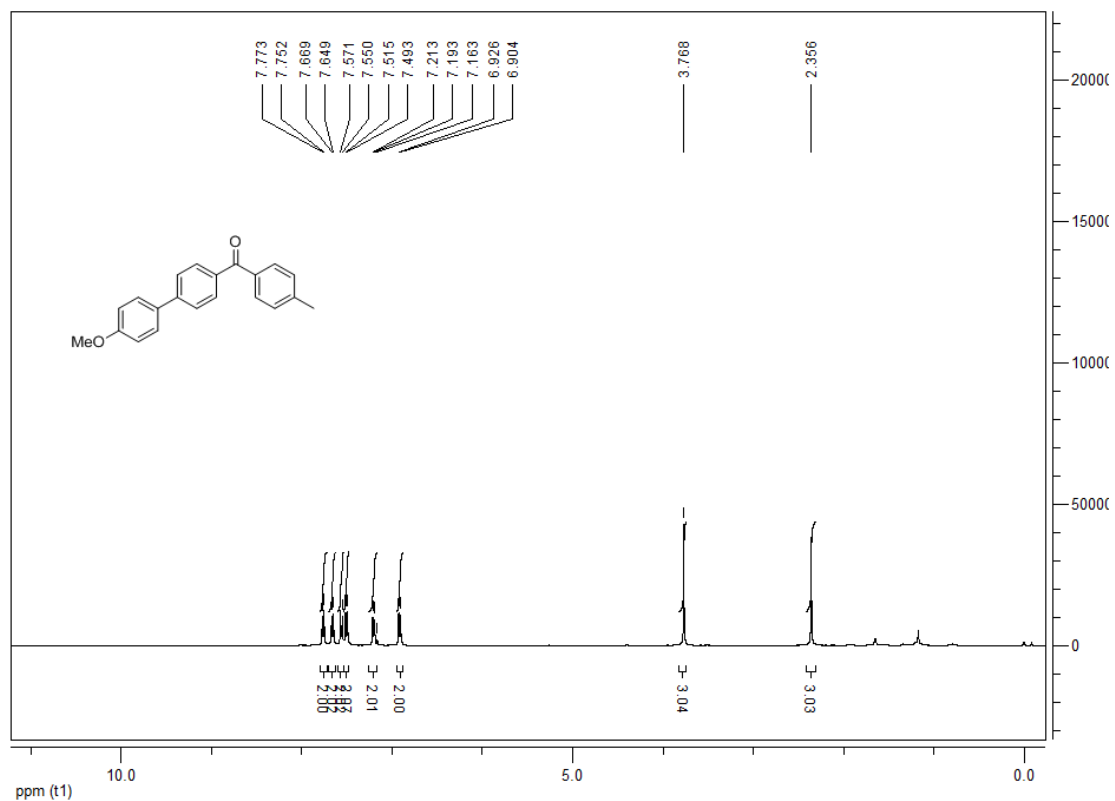

## <sup>13</sup>C NMR

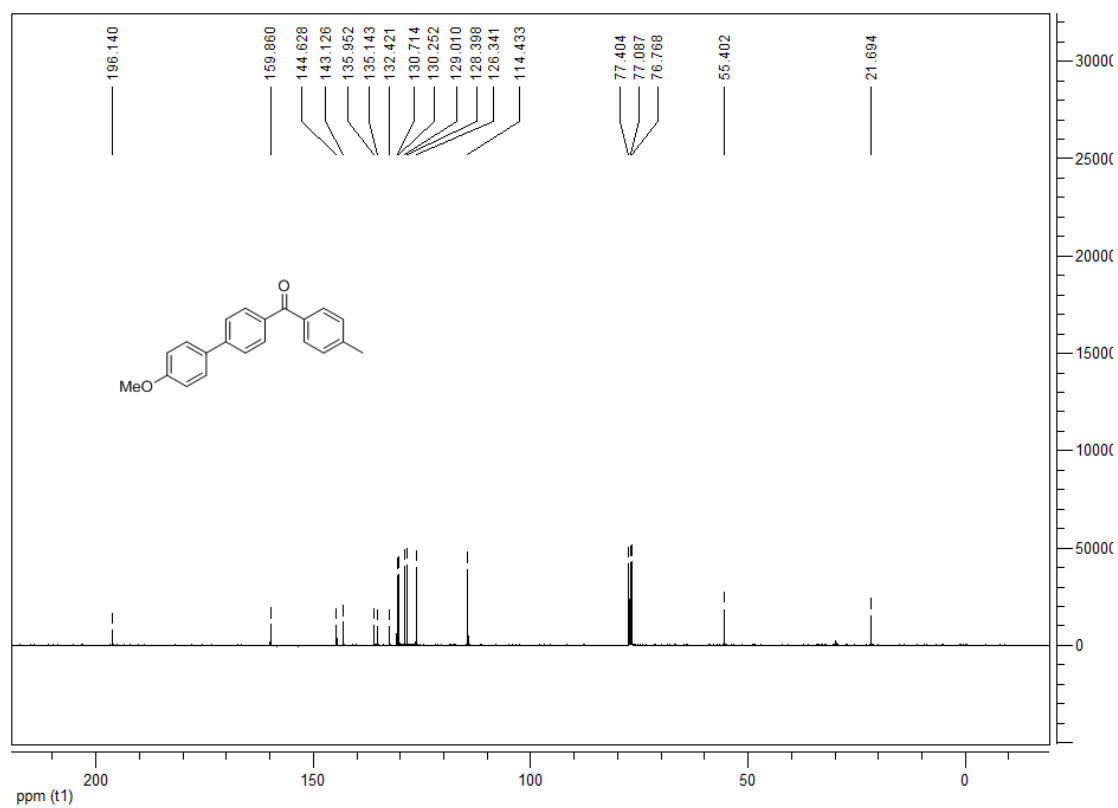

# (4'-methyl-[1,1'-biphenyl]-4-yl)(p-tolyl)methanone 6

## <sup>1</sup>H NMR

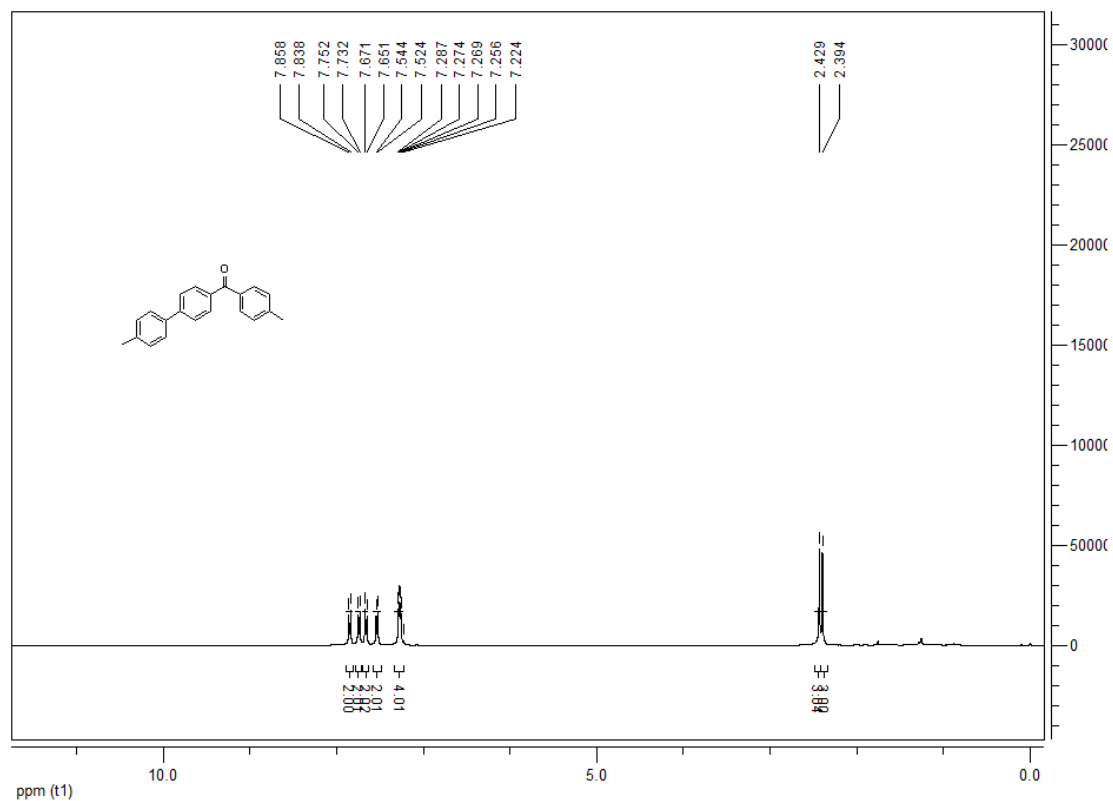

## <sup>13</sup>C NMR

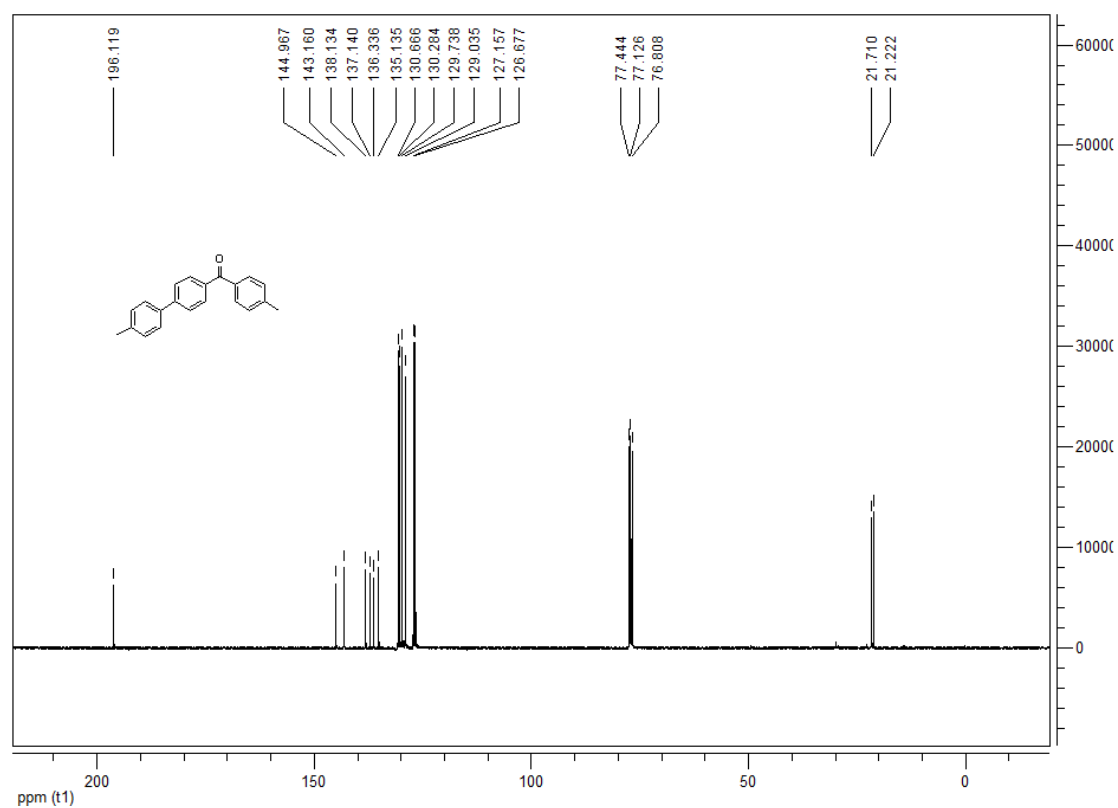

## 10. HRMS spectra of new compounds

### 4-fluoro-N-phenyl-N-tosylbenzamide 1e

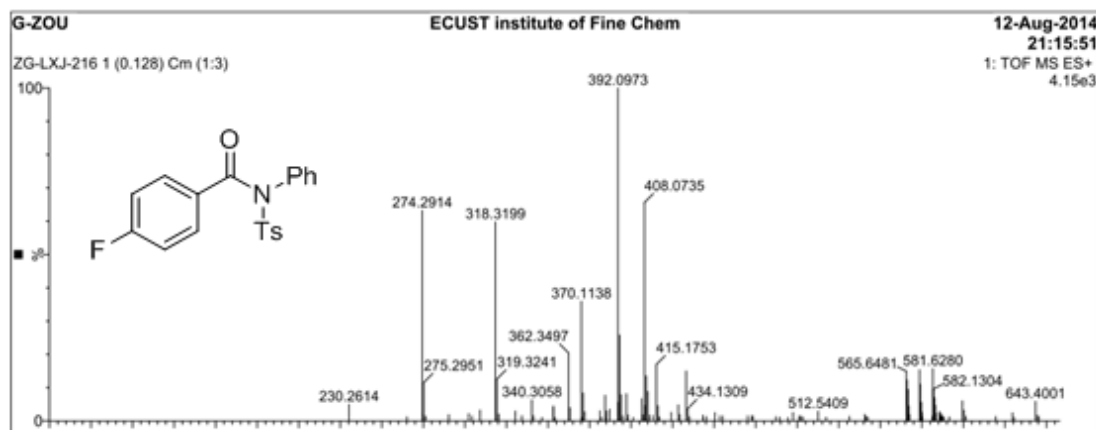

### N-phenyl-N-tosyl-4-(trifluoromethyl)benzamide 1f

#### Elemental Composition Report

Page 1

#### Single Mass Analysis

Tolerance = 30.0 mDa / DBE: min = -1.5, max = 100.0

Element prediction: Off

Number of isotope peaks used for i-FIT = 2

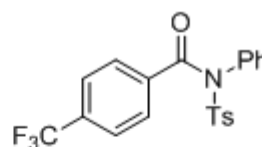

Monoisotopic Mass, Even Electron Ions

94 formula(e) evaluated with 7 results within limits (up to 1 best isotopic matches for each mass)

Elements Used:

C: 0-22 H: 0-60 N: 0-1 O: 0-5 S: 0-2 F: 3-3

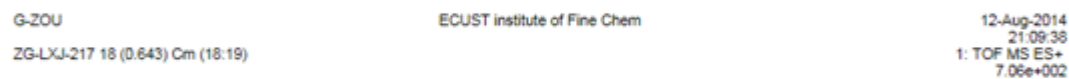

| Mass     | Calc. Mass | mDa | PPM | DBE  | i-FIT | i-FIT (Norm) | Formula           |
|----------|------------|-----|-----|------|-------|--------------|-------------------|
| 420.0883 | 420.0881   | 0.2 | 0.5 | 12.5 | 11.9  | 0.0          | C21 H17 N O3 S F3 |

# methyl 4-(phenyl(tosyl)carbamoyl)benzoate 1g

## Elemental Composition Report

Page 1

### Single Mass Analysis

Tolerance = 30.0 mDa / DBE: min = -1.5, max = 100.0

Element prediction: Off

Number of isotope peaks used for i-FIT = 2

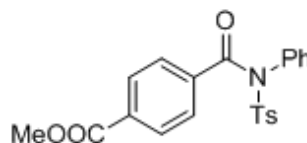

Monoisotopic Mass, Even Electron Ions

55 formula(e) evaluated with 3 results within limits (up to 1 best isotopic matches for each mass)

Elements Used:

C: 0-22 H: 0-60 N: 0-1 O: 0-5 S: 0-2

G-ZOU

ECUST Institute of Fine Chem

12-Aug-2014

21:05:23

1: TOF MS ES+

1.59e+003

ZG-LXJ-219 39 (1.262) Cm (37:40)

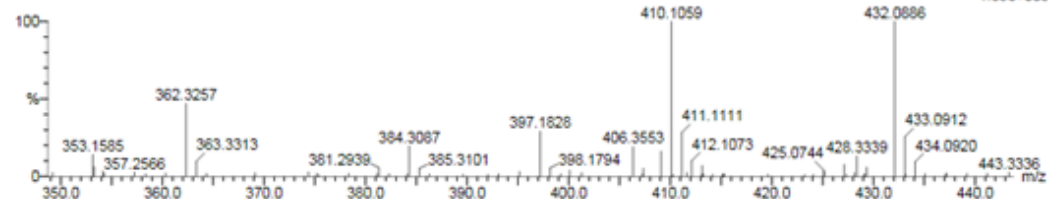

Minimum: -1.5  
Maximum: 30.0 50.0 100.0

| Mass     | Calc. Mass | mDa  | PPM  | DBE  | 1-FIT | 1-FIT (Norm) | Formula        |
|----------|------------|------|------|------|-------|--------------|----------------|
| 410.1059 | 410.1062   | -0.3 | -0.7 | 13.5 | 13.9  | 0.0          | C22 H20 N O5 S |

# 4-cyano-N-phenyl-N-tosylbenzamide 1h

## Elemental Composition Report

Page 1

### Single Mass Analysis

Tolerance = 30.0 mDa / DBE: min = -1.5, max = 100.0

Element prediction: Off

Number of isotope peaks used for i-FIT = 2

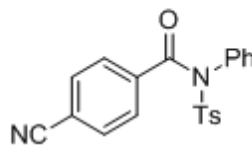

Monoisotopic Mass, Even Electron Ions

137 formula(e) evaluated with 10 results within limits (up to 1 best isotopic matches for each mass)

Elements Used:

C: 0-22 H: 0-60 N: 0-2 O: 0-5 S: 0-2

G-ZOU

ECUST Institute of Fine Chem

12-Aug-2014

21:13:06

1: TOF MS ES+

3.69e+002

ZG-LXJ-218 13 (0.497) Cm (13:14)

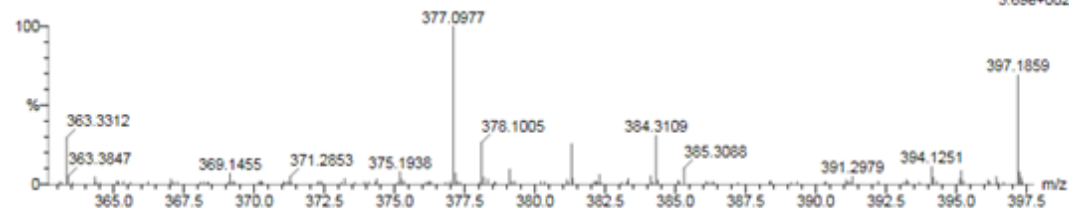

Minimum: -1.5  
Maximum: 30.0 50.0 100.0

| Mass     | Calc. Mass | mDa | PPM | DBE  | 1-FIT | 1-FIT (Norm) | Formula         |
|----------|------------|-----|-----|------|-------|--------------|-----------------|
| 377.0977 | 377.0960   | 1.7 | 4.5 | 14.5 | 37.3  | 0.0          | C21 H17 N2 O3 S |

## 4-nitro-N-phenyl-N-tosylbenzamide 1i

### Elemental Composition Report

Page 1

#### Single Mass Analysis

Tolerance = 30.0 mDa / DBE: min = -1.5, max = 100.0

Element prediction: Off

Number of isotope peaks used for i-FIT = 2

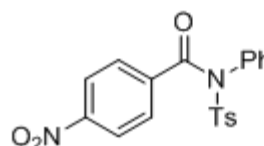

Monoisotopic Mass, Even Electron Ions

73 formula(e) evaluated with 4 results within limits (up to 1 best isotopic matches for each mass)

Elements Used:

C: 0-23 H: 0-70 N: 0-2 O: 0-5 S: 0-1

G-ZOU

ECUST institute of Fine Chem

13-Jul-2014

11:42:20

1: TOF MS ES+

8.23e+003

ZG-LXJ-204 25 (0.866) Cm (24:32)

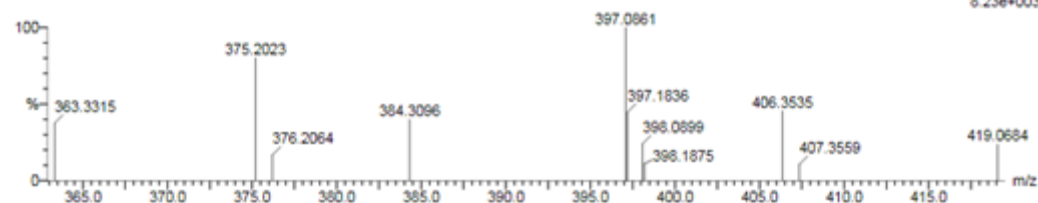

Minimum: 30.0 50.0 -1.5  
Maximum: 30.0 50.0 100.0

| Mass     | Calc. Mass | mDa | PPM | DBE  | i-FIT | i-FIT (Norm) | Formula         |
|----------|------------|-----|-----|------|-------|--------------|-----------------|
| 397.0861 | 397.0858   | 0.3 | 0.8 | 13.5 | 37.3  | 0.0          | C20 H17 N2 O5 S |

## 4-methyl-N-phenyl-N-tosylbenzamide 1j

### Elemental Composition Report

Page 1

#### Single Mass Analysis

Tolerance = 30.0 mDa / DBE: min = -1.5, max = 100.0

Element prediction: Off

Number of isotope peaks used for i-FIT = 2

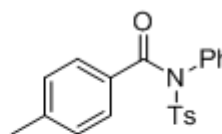

Monoisotopic Mass, Even Electron Ions

89 formula(e) evaluated with 3 results within limits (up to 1 best isotopic matches for each mass)

Elements Used:

C: 0-22 H: 0-70 N: 0-2 O: 0-5 S: 0-1

G-ZOU

ECUST institute of Fine Chem

13-Jul-2014

11:05:44

1: TOF MS ES+

3.58e+003

ZG-LXJ-200 20 (0.691) Cm (17:21)

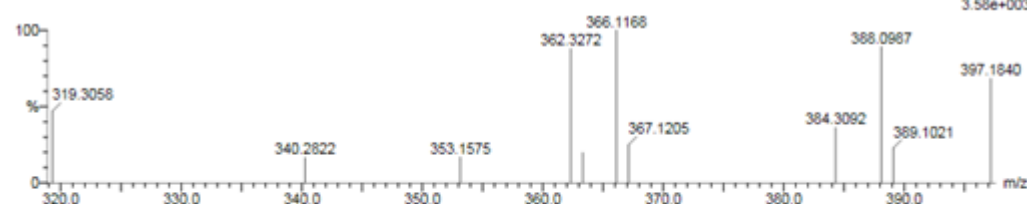

Minimum: 30.0 50.0 -1.5  
Maximum: 30.0 50.0 100.0

| Mass     | Calc. Mass | mDa | PPM | DBE  | i-FIT | i-FIT (Norm) | Formula        |
|----------|------------|-----|-----|------|-------|--------------|----------------|
| 366.1168 | 366.1164   | 0.4 | 1.1 | 12.5 | 6.6   | 0.0          | C21 H20 N O3 S |

## 4-methoxy-N-phenyl-N-tosylbenzamide 1k

### Elemental Composition Report

#### Single Mass Analysis

Tolerance = 30.0 mDa / DBE: min = -1.5, max = 100.0

Element prediction: Off

Number of isotope peaks used for i-FIT = 2

Monoisotopic Mass, Even Electron Ions

239 formula(e) evaluated with 10 results within limits (up to 1 best isotopic matches for each mass)

Elements Used:

C: 0-30 H: 0-70 N: 0-2 O: 0-8 S: 0-1

G-ZOU

ECUST Institute of Fine Chem

13-Jul-2014

10:49:46

1: TOF MS ES+

1.02e+004

ZG-LXJ-203 3 (0.176) Cm (1:8)

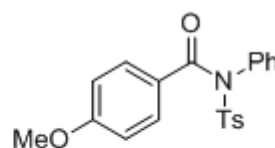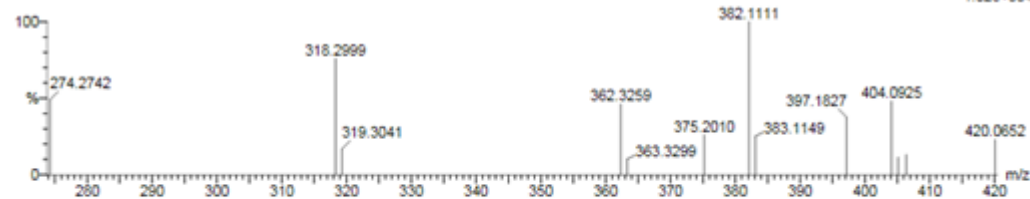

Minimum: -1.5  
Maximum: 100.0

| Mass     | Calc. Mass | mDa  | PPM  | DBE  | 1-FIT | 1-FIT (Norm) | Formula        |
|----------|------------|------|------|------|-------|--------------|----------------|
| 382.1111 | 382.1119   | -0.2 | -0.5 | 12.5 | 7.1   | 0.0          | C21 H20 N O4 S |

## tert-butyl (4-(phenyl(tosyl)carbamoyl)phenyl)carbamate 1l

### Elemental Composition Report

#### Single Mass Analysis

Tolerance = 30.0 mDa / DBE: min = -1.5, max = 100.0

Element prediction: Off

Number of isotope peaks used for i-FIT = 2

Monoisotopic Mass, Even Electron Ions

201 formula(e) evaluated with 15 results within limits (up to 1 best isotopic matches for each mass)

Elements Used:

C: 0-30 H: 0-70 N: 0-2 O: 0-8 S: 0-1

G-ZOU

ECUST Institute of Fine Chem

13-Jul-2014

10:38:46

1: TOF MS ES+

3.44e+003

ZG-LXJ-208 39 (1.282) Cm (37:42)

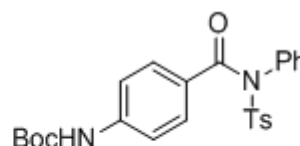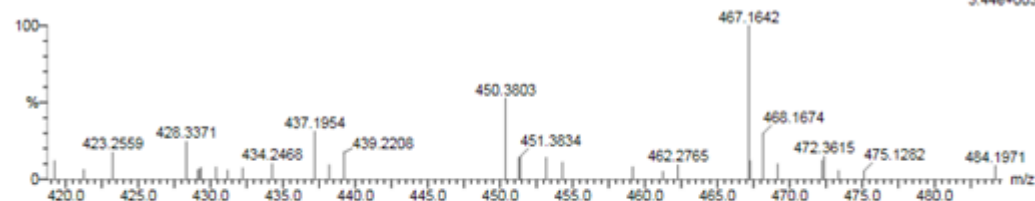

Minimum: -1.5  
Maximum: 100.0

| Mass     | Calc. Mass | mDa | PPM | DBE  | 1-FIT | 1-FIT (Norm) | Formula         |
|----------|------------|-----|-----|------|-------|--------------|-----------------|
| 467.1642 | 467.1641   | 0.1 | 0.2 | 13.5 | 19.0  | 0.0          | C25 H27 N2 O5 S |



## N-phenyl-N-tosylfuran-2-carboxamide 1m

### Elemental Composition Report

Page 1

#### Single Mass Analysis

Tolerance = 30.0 mDa / DBE: min = -1.5, max = 100.0  
Element prediction: Off  
Number of isotope peaks used for i-FIT = 2

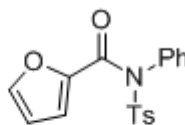

Monoisotopic Mass, Even Electron Ions

112 formula(e) evaluated with 4 results within limits (up to 1 best isotopic matches for each mass)

Elements Used:

C: 0-22 H: 0-70 N: 0-2 O: 0-5 S: 0-1

G-ZOU

ECUST Institute of Fine Chem

13-Jul-2014

11:15:05

1: TOF MS ES+

2.13e+004

ZG-LXJ-211 18 (0.644) Cm (9.23)

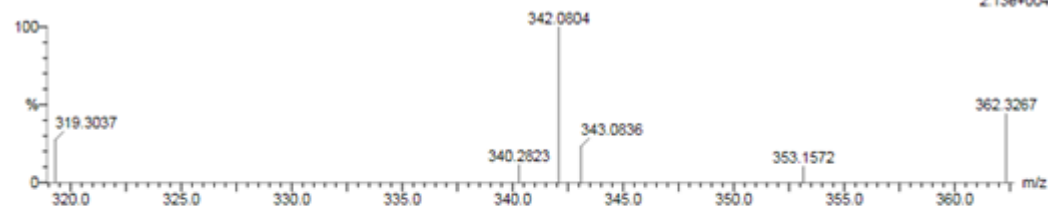

Minimum: 30.0 50.0 -1.5  
Maximum: 100.0

| Mass     | Calc. Mass | mDa | PPM | DBE  | i-FIT | i-FIT (Norm) | Formula        |
|----------|------------|-----|-----|------|-------|--------------|----------------|
| 342.0804 | 342.0800   | 0.4 | 1.2 | 11.5 | 9.0   | 0.0          | C18 H16 N O4 S |

## N-phenyl-N-tosylthiophene-2-carboxamide 1n

### Elemental Composition Report

Page 1

#### Single Mass Analysis

Tolerance = 30.0 mDa / DBE: min = -1.5, max = 100.0  
Element prediction: Off  
Number of isotope peaks used for i-FIT = 2

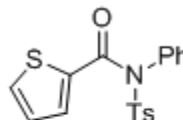

Monoisotopic Mass, Even Electron Ions

163 formula(e) evaluated with 7 results within limits (up to 1 best isotopic matches for each mass)

Elements Used:

C: 0-22 H: 0-70 N: 0-2 O: 0-5 S: 0-2

G-ZOU

ECUST Institute of Fine Chem

13-Jul-2014

11:17:53

1: TOF MS ES+

1.01e+004

ZG-LXJ-212 32 (1.060) Cm (31.44)

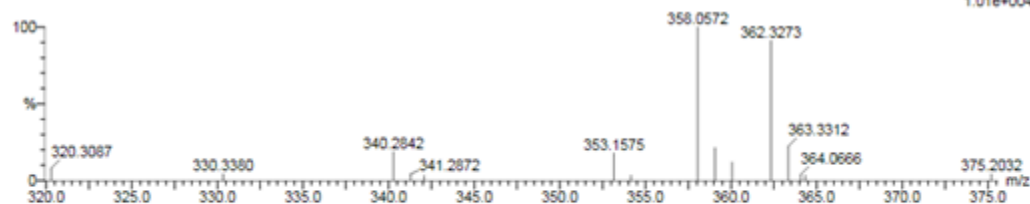

Minimum: 30.0 50.0 -1.5  
Maximum: 100.0

| Mass     | Calc. Mass | mDa | PPM | DBE  | i-FIT | i-FIT (Norm) | Formula         |
|----------|------------|-----|-----|------|-------|--------------|-----------------|
| 358.0572 | 358.0572   | 0.0 | 0.0 | 11.5 | 7.7   | 0.0          | C18 H16 N O3 S2 |

# N-phenyl-N-tosylcinnamamide 1o

## Elemental Composition Report

Page 1

### Single Mass Analysis

Tolerance = 30.0 mDa / DBE: min = -1.5, max = 100.0

Element prediction: Off

Number of isotope peaks used for i-FIT = 2

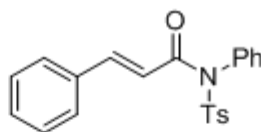

Monoisotopic Mass, Even Electron Ions

239 formula(e) evaluated with 12 results within limits (up to 1 best isotopic matches for each mass)

Elements Used:

C: 0-30 H: 0-70 N: 0-2 O: 0-8 S: 0-1

G-ZOU

ECUST institute of Fine Chem

13-Jul-2014

10:43:04

1: TOF MS ES+

1.65e+004

ZG-LXJ-214 27 (0.913) Cm (18:29)

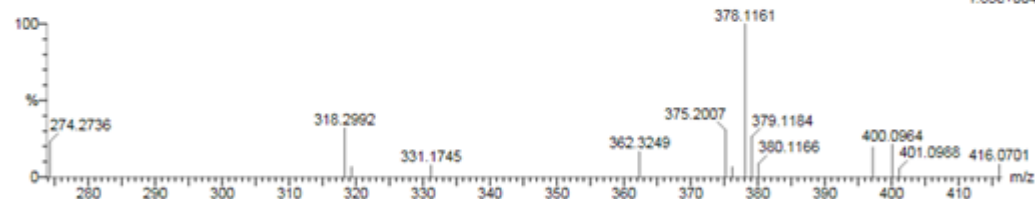

Minimum: -1.5  
Maximum: 100.0

| Mass     | Calc. Mass | mDa  | PPM  | DBE  | 1-FIT | 1-FIT (Norm) | Formula        |
|----------|------------|------|------|------|-------|--------------|----------------|
| 378.1161 | 378.1164   | -0.3 | -0.8 | 13.5 | 7.7   | 0.0          | C22 H20 N O3 S |

# N,3-diphenyl-N-tosylpropanamide 1p

## Elemental Composition Report

Page 1

### Single Mass Analysis

Tolerance = 30.0 mDa / DBE: min = -1.5, max = 100.0

Element prediction: Off

Number of isotope peaks used for i-FIT = 2

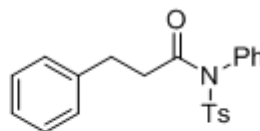

Monoisotopic Mass, Even Electron Ions

487 formula(e) evaluated with 23 results within limits (up to 1 best isotopic matches for each mass)

Elements Used:

C: 0-30 H: 0-70 N: 0-2 O: 0-8 S: 0-1 Na: 0-1

G-ZOU

ECUST institute of Fine Chem

13-Jul-2014

10:46:51

1: TOF MS ES+

5.45e+003

ZG-LXJ-213 9 (0.374) Cm (7:13)

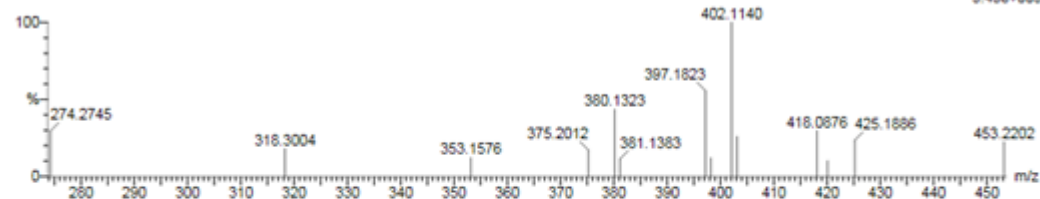

Minimum: -1.5  
Maximum: 100.0

| Mass     | Calc. Mass | mDa | PPM | DBE  | 1-FIT | 1-FIT (Norm) | Formula           |
|----------|------------|-----|-----|------|-------|--------------|-------------------|
| 402.1140 | 402.1140   | 0.0 | 0.0 | 12.5 | 6.8   | 0.0          | C22 H21 N O3 S Na |

## N-phenyl-N-tosylstearamide 1q

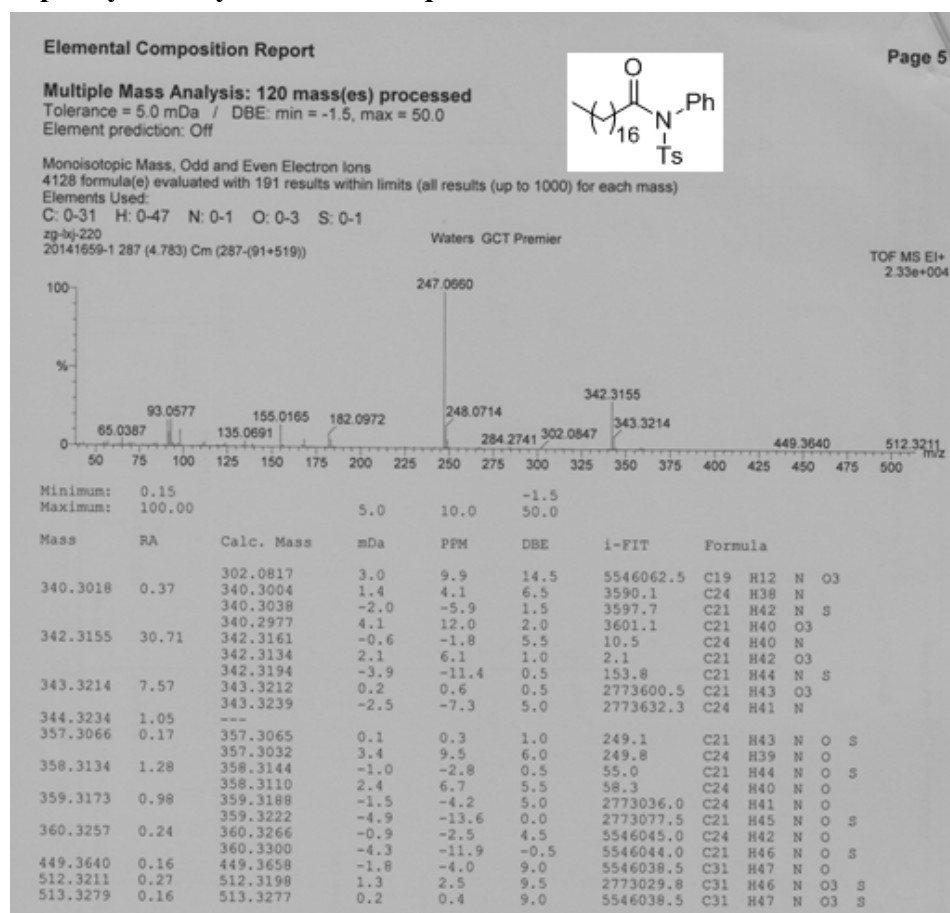

## N-phenyl-N-tosylcyclohexanecarboxamide 1r

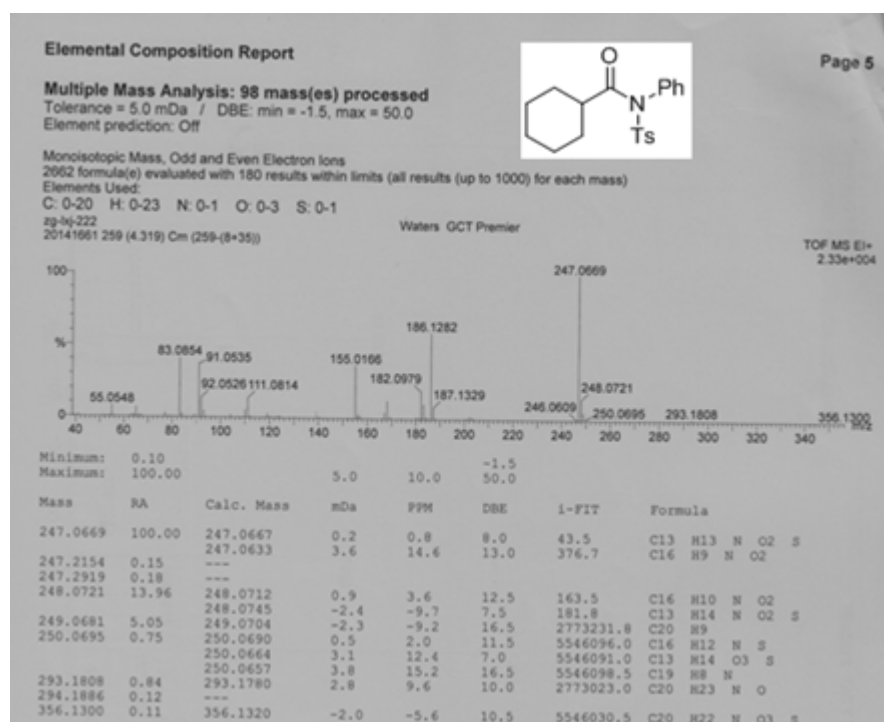

## (3r,5r,7r)-N-phenyl-N-tosyladamantane-1-carboxamide 1s

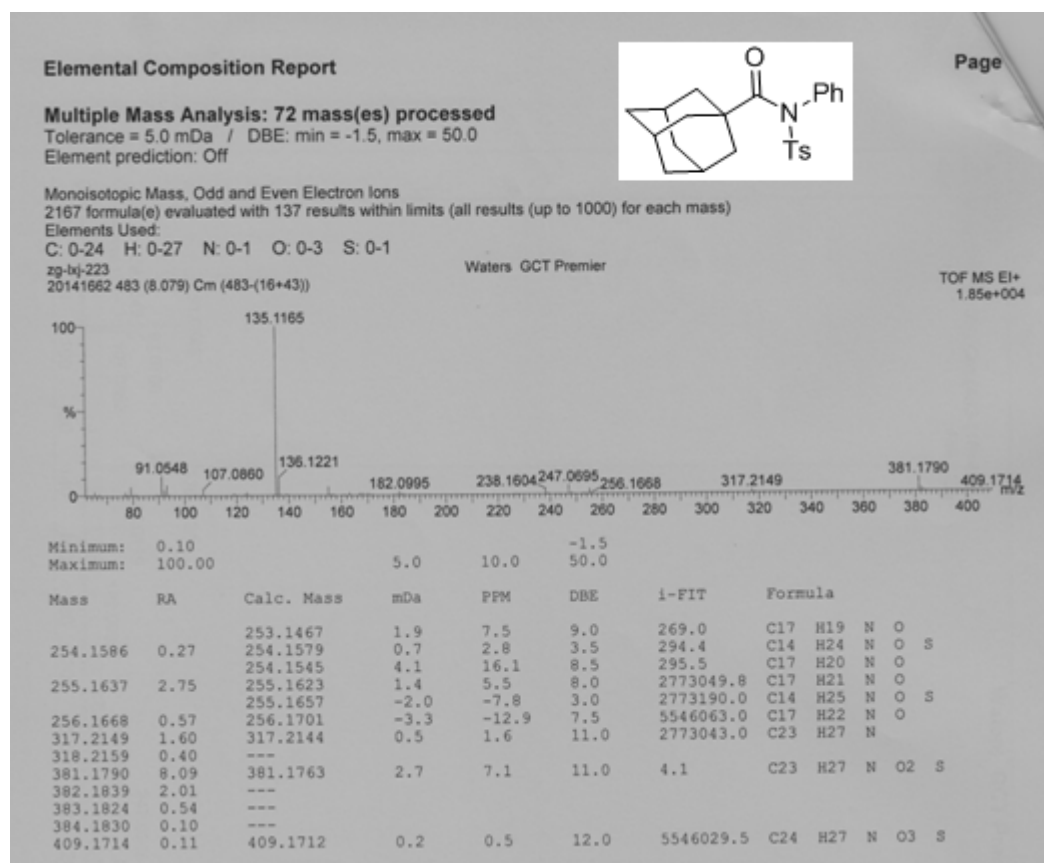

## 2-methyl-N-phenyl-N-tosylbenzamide 1t

### Elemental Composition Report

#### Single Mass Analysis

Tolerance = 30.0 mDa / DBE: min = -1.5, max = 100.0

Element prediction: Off

Number of isotope peaks used for i-FIT = 2

# (3r,5r,7r)-N-(3,5-bis(trifluoromethyl)phenyl)-N-tosyladamantane-1-carboxamide

1u

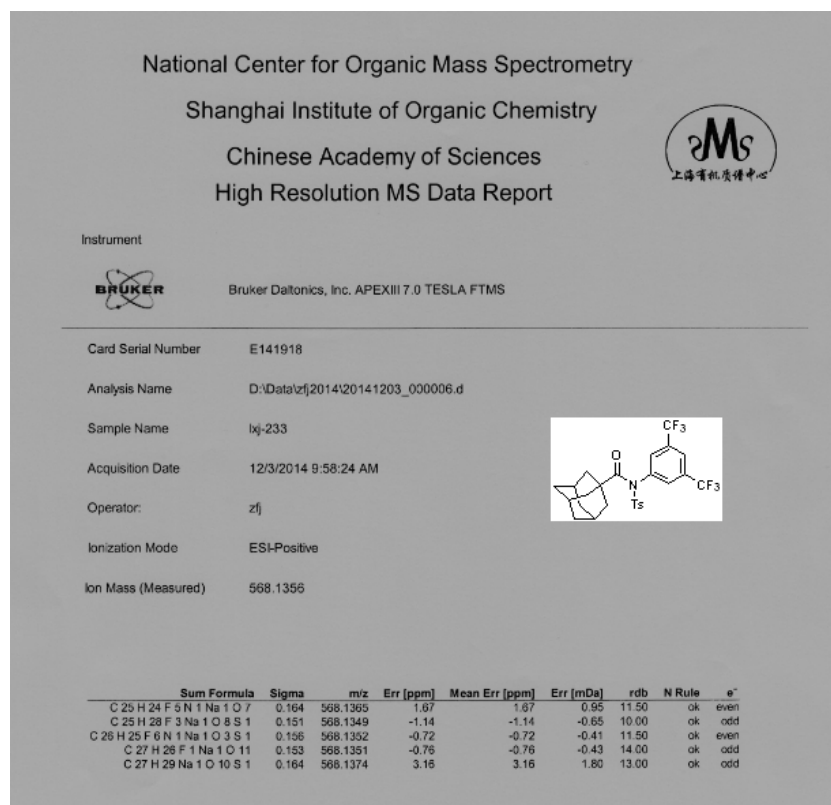

# N-(3,5-bis(trifluoromethyl)phenyl)-2-methyl-N-tosylbenzamide 1v

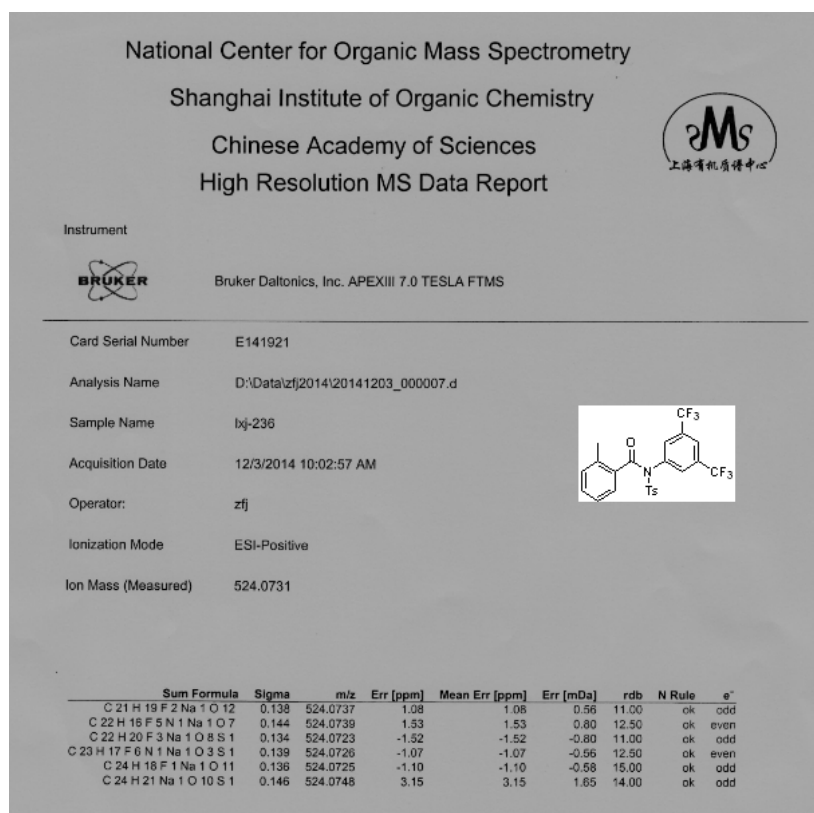

## 4-chloro-N-phenyl-N-tosylbenzamide 1w

### Elemental Composition Report

#### Single Mass Analysis

Tolerance = 30.0 mDa / DBE: min = -1.5, max = 100.0

Element prediction: Off

Number of isotope peaks used for i-FIT = 2

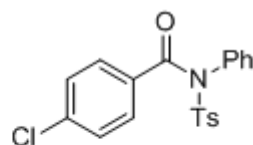

Page 1

Monoisotopic Mass, Even Electron Ions

259 formula(e) evaluated with 11 results within limits (up to 1 best isotopic matches for each mass)

Elements Used:

C: 0-25 H: 0-70 N: 0-2 O: 0-3 S: 0-1 Cl: 0-2

G-ZOU

ECUST Institute of Fine Chem

ZG-LXJ-205 20 (0.691) Cm (19:20)

13-Jul-2014  
10:52:58  
1: TOF MS ES+  
2.47e+003

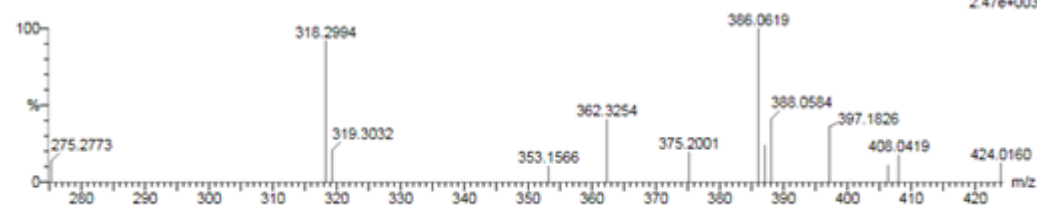

Minimum: 30.0 50.0 -1.5  
Maximum: 30.0 50.0 100.0

| Mass     | Calc. Mass | mDa | PPM | DBE  | i-FIT | i-FIT (Norm) | Formula           |
|----------|------------|-----|-----|------|-------|--------------|-------------------|
| 386.0619 | 386.0618   | 0.1 | 0.3 | 12.5 | 6.5   | 0.0          | C20 H17 N O3 S Cl |

## 4-bromo-N-phenyl-N-tosylbenzamide 1x

### Elemental Composition Report

#### Single Mass Analysis

Tolerance = 30.0 mDa / DBE: min = -1.5, max = 100.0

Element prediction: Off

Number of isotope peaks used for i-FIT = 2

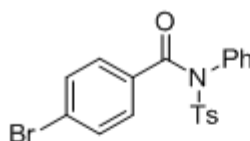

Page 1

Monoisotopic Mass, Even Electron Ions

265 formula(e) evaluated with 10 results within limits (up to 1 best isotopic matches for each mass)

Elements Used:

C: 0-22 H: 0-70 N: 0-2 O: 0-5 S: 0-1 Br: 0-2

G-ZOU

ECUST Institute of Fine Chem

ZG-LXJ-206 13 (0.497) Cm (1:13)

13-Jul-2014  
11:02:19  
1: TOF MS ES+  
3.68e+003

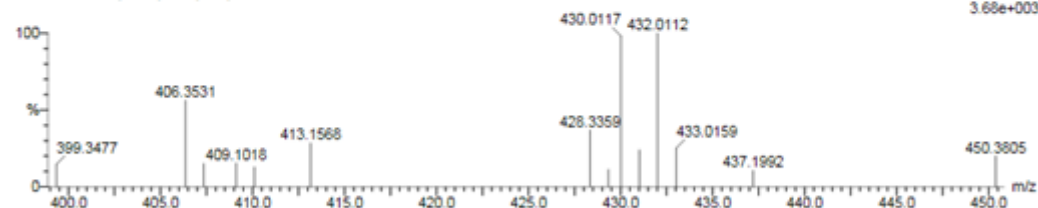

Minimum: 30.0 50.0 -1.5  
Maximum: 30.0 50.0 100.0

| Mass     | Calc. Mass | mDa | PPM | DBE  | i-FIT | i-FIT (Norm) | Formula           |
|----------|------------|-----|-----|------|-------|--------------|-------------------|
| 430.0117 | 430.0113   | 0.4 | 0.9 | 12.5 | 8.5   | 0.0          | C20 H17 N O3 S Br |

## N-(4-acetylphenyl)-2-methyl-N-tosylbenzamide 1t-1

National Center for Organic Mass Spectrometry  
Shanghai Institute of Organic Chemistry  
Chinese Academy of Sciences  
High Resolution MS Data Report



Instrument  
 Bruker Daltonics, Inc. APEXIII 7.0 TESLA FTMS

Card Serial Number E141917  
Analysis Name D:\Data\zjf\2014\20141203\_000006.d  
Sample Name lj-234  
Acquisition Date 12/3/2014 9:58:24 AM  
Operator: zjf  
Ionization Mode ESI-Positive  
Ion Mass (Measured) 430.1085



| Sum Formula                | Sigma | m/z      | Err [ppm] | Mean Err [ppm] | Err [mDa] | rdb   | N Rule | e <sup>-</sup> |
|----------------------------|-------|----------|-----------|----------------|-----------|-------|--------|----------------|
| C 23 H 21 N 1 Na 1 O 4 S 1 | 0.139 | 430.1083 | -0.37     | -0.37          | -0.16     | 13.50 | ok     | even           |

## N-(2,4-difluorophenyl)-2-methyl-N-tosylbenzamide 1t-2

National Center for Organic Mass Spectrometry  
Shanghai Institute of Organic Chemistry  
Chinese Academy of Sciences  
High Resolution MS Data Report



Instrument  
 Bruker Daltonics, Inc. APEXIII 7.0 TESLA FTMS

Card Serial Number E141919  
Analysis Name D:\Data\zjf\2014\20141203\_000007.d  
Sample Name lj-239  
Acquisition Date 12/3/2014 10:02:57 AM  
Operator: zjf  
Ionization Mode ESI-Positive  
Ion Mass (Measured) 424.0792



| Sum Formula                    | Sigma | m/z      | Err [ppm] | Mean Err [ppm] | Err [mDa] | rdb   | N Rule | e <sup>-</sup> |
|--------------------------------|-------|----------|-----------|----------------|-----------|-------|--------|----------------|
| C 20 H 16 F 1 N 1 Na 1 O 7     | 0.096 | 424.0803 | 2.68      | 2.49           | 1.14      | 12.50 | ok     | even           |
| C 21 H 17 F 2 N 1 Na 1 O 3 S 1 | 0.054 | 424.0789 | -0.52     | -0.90          | -0.22     | 12.50 | ok     | even           |
| C 23 H 15 N 1 Na 1 O 6         | 0.042 | 424.0792 | -0.01     | -0.29          | -0.00     | 16.50 | ok     | even           |
| C 24 H 16 F 1 N 1 Na 1 O 2 S 1 | 0.048 | 424.0778 | -3.22     | -3.62          | -1.36     | 16.50 | ok     | even           |

## 2-methyl-N-tosyl-N-(3-(trifluoromethyl)phenyl)benzamide 1t-3

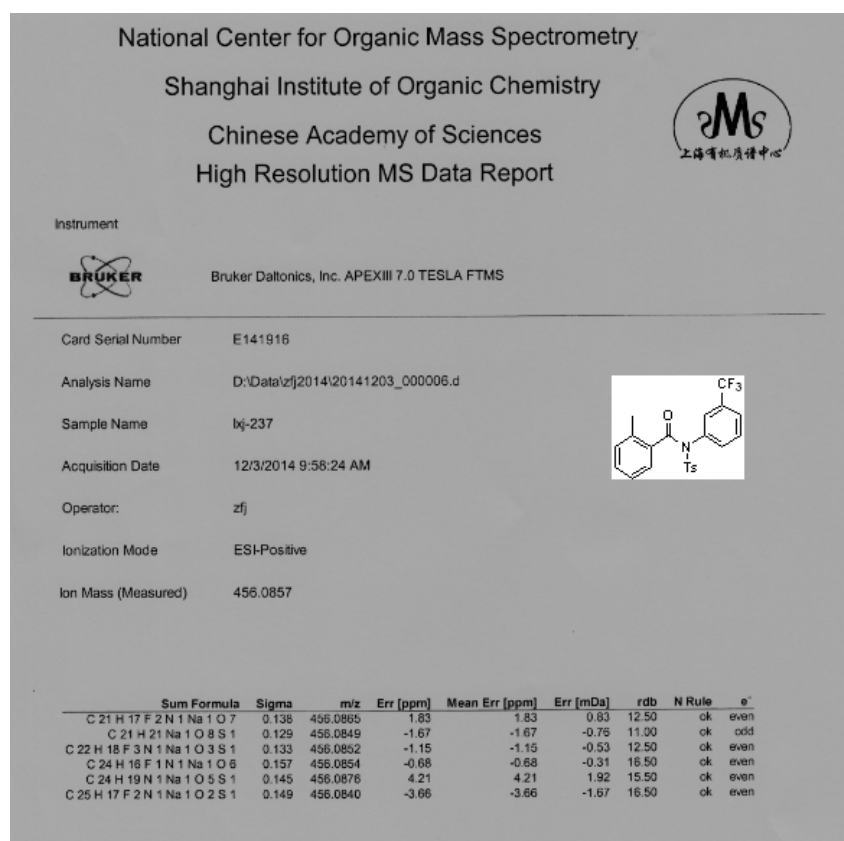

## 2-methyl-N-tosyl-N-(4-(trifluoromethyl)phenyl)benzamide 1t-4

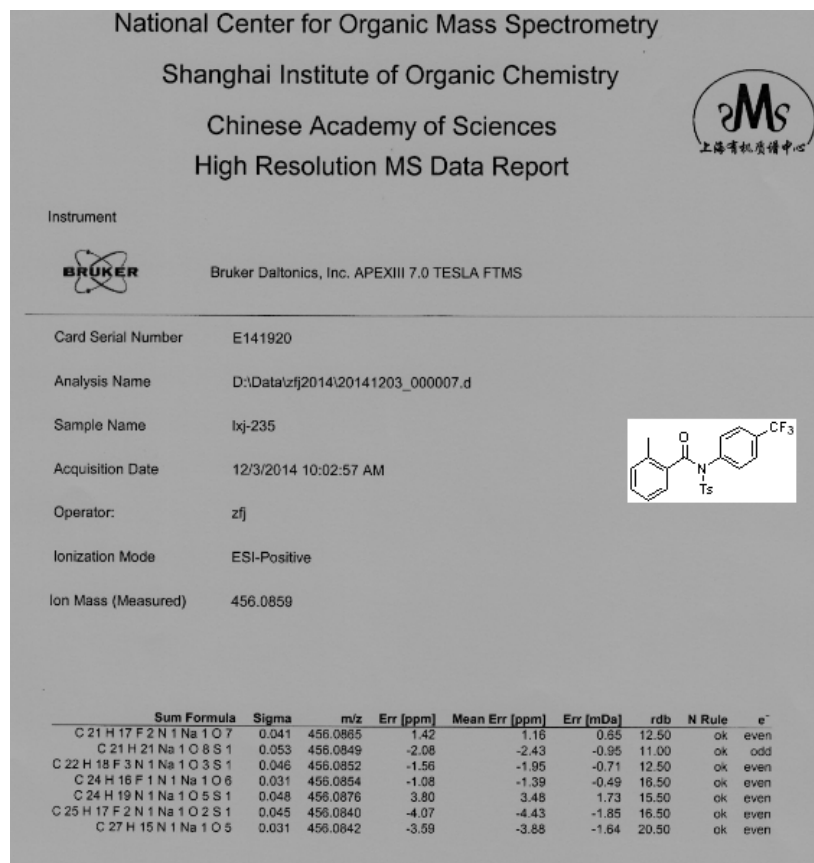



# N-(3,5-difluorophenyl)-2-methyl-N-tosylbenzamide 1t-5

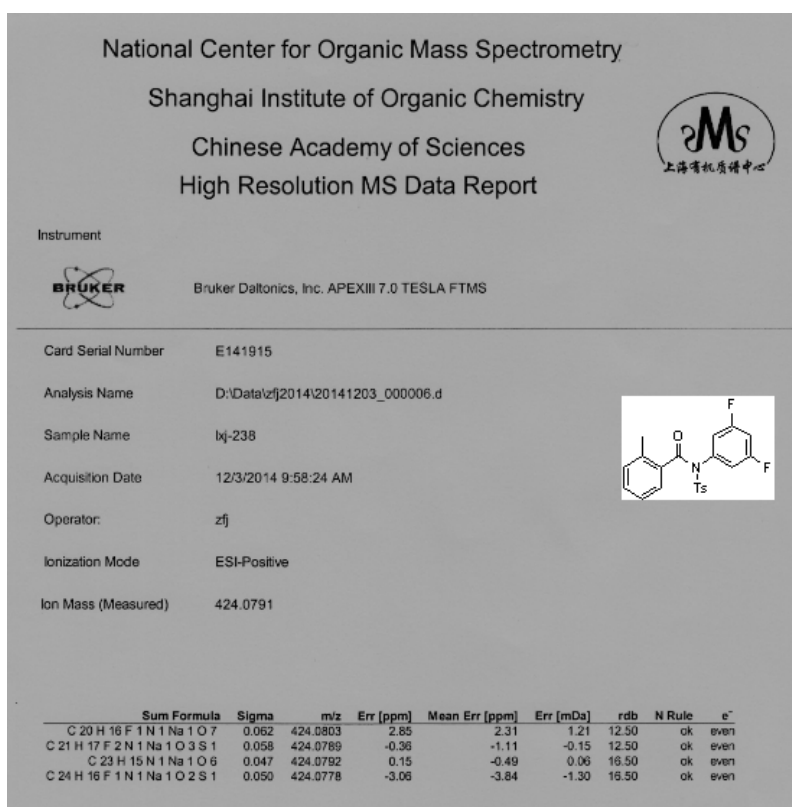

# 1-(o-tolyl)octadecan-1-one 3qi

## Elemental Composition Report

Page 1

### Multiple Mass Analysis: 8 mass(es) processed

Tolerance = 5.0 mDa / DBE: min = -1.5, max = 50.0

Isotope cluster parameters: Separation = 1.0 Abundance = 1.0%

Monoisotopic Mass, Odd and Even Electron Ions

34 formula(e) evaluated with 8 results within limits (up to 50 closest results for each mass)

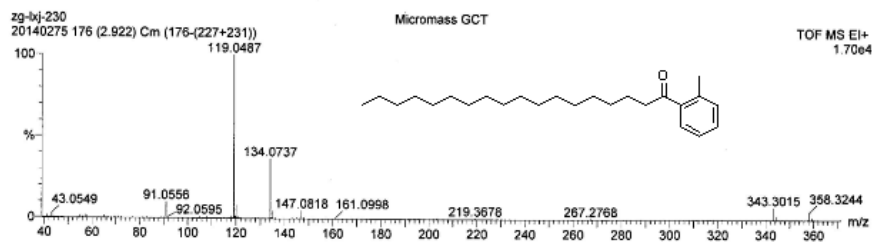

| Mass     | RA     | Calc. Mass | mDa  | PPM   | DBE | Score | Formula   |
|----------|--------|------------|------|-------|-----|-------|-----------|
| 91.0556  | 9.79   | 91.0548    | 0.8  | 9.1   | 4.5 | 1     | C7 H7     |
| 119.0487 | 100.00 | 119.0497   | -1.0 | -8.3  | 5.5 | 1     | C8 H7 O   |
| 120.0539 | 7.87   | 120.0575   | -3.6 | -30.1 | 5.0 | 1     | C8 H8 O   |
| 134.0737 | 36.38  | 134.0732   | 0.5  | 4.0   | 5.0 | 1     | C9 H10 O  |
| 135.0782 | 4.47   | 135.0810   | -2.8 | -20.7 | 4.5 | 1     | C9 H11 O  |
| 147.0818 | 4.87   | 147.0810   | 0.8  | 5.5   | 5.5 | 1     | C10 H12 O |
| 343.3015 | 7.45   | 343.3001   | 1.4  | 4.1   | 5.5 | 1     | C24 H39 O |
| 358.3244 | 4.37   | 358.3236   | 0.8  | 2.3   | 5.0 | 1     | C25 H42 O |

# 1-(2-ethylphenyl)octadecan-1-one 3qj

## Elemental Composition Report

Page

### Multiple Mass Analysis: 9 mass(es) processed

Tolerance = 5.0 mDa / DBE: min = -1.5, max = 50.0

Isotope cluster parameters: Separation = 1.0 Abundance = 1.0%

Monoisotopic Mass, Odd and Even Electron Ions

43 formula(e) evaluated with 9 results within limits (up to 50 closest results for each mass)

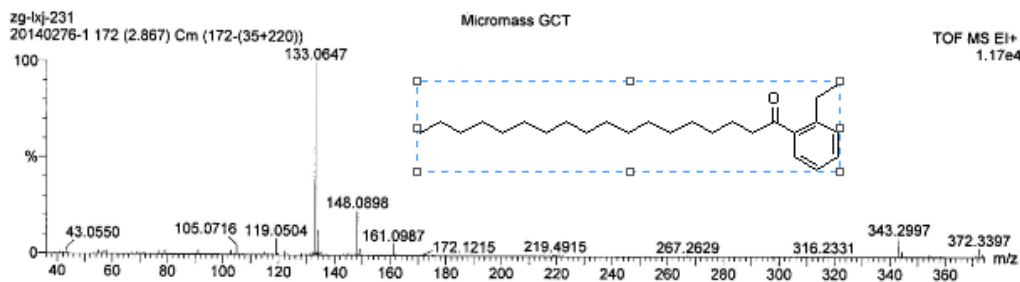

Minimum: 3.00  
Maximum: 100.00

| Mass     | RA     | Calc. Mass | mDa  | PPM   | DBE | Score | Formula   |
|----------|--------|------------|------|-------|-----|-------|-----------|
| 105.0716 | 4.57   | 105.0704   | 1.2  | 11.2  | 4.5 | 1     | C8 H9     |
| 119.0504 | 8.18   | 119.0497   | 0.7  | 6.0   | 5.5 | 1     | C8 H7 O   |
| 133.0647 | 100.00 | 133.0653   | -0.6 | -4.8  | 5.5 | 1     | C9 H9 O   |
| 134.0706 | 12.69  | 134.0732   | -2.6 | -19.1 | 5.0 | 1     | C9 H10 O  |
| 148.0898 | 23.00  | 148.0888   | 1.0  | 6.7   | 5.0 | 1     | C10 H12 O |
| 149.0948 | 3.22   | 149.0966   | -1.8 | -12.3 | 4.5 | 1     | C10 H13 O |
| 161.0987 | 5.92   | 161.0966   | 2.1  | 12.8  | 5.5 | 1     | C11 H13 O |
| 343.2997 | 9.52   | 343.3001   | -0.4 | -1.1  | 5.5 | 1     | C24 H39 O |
| 372.3397 | 4.26   | 372.3392   | 0.5  | 1.3   | 5.0 | 1     | C26 H44 O |

# (3r,5r,7r)-adamantan-1-yl(2-ethylphenyl)methanone 3uj

## Elemental Composition Report

Page 1

### Multiple Mass Analysis: 15 mass(es) processed

Tolerance = 5.0 mDa / DBE: min = -1.5, max = 50.0

Element prediction: Off

Monoisotopic Mass, Odd and Even Electron Ions

54 formula(e) evaluated with 12 results within limits (all results (up to 1000) for each mass)

Elements Used:

C: 0-19 H: 0-24 O: 0-1

zg-lxj-241

20142638-1 66 (1.100) Cm (66-(16+18))

Waters GCT Premier

TOF MS EI+  
2.14e+004

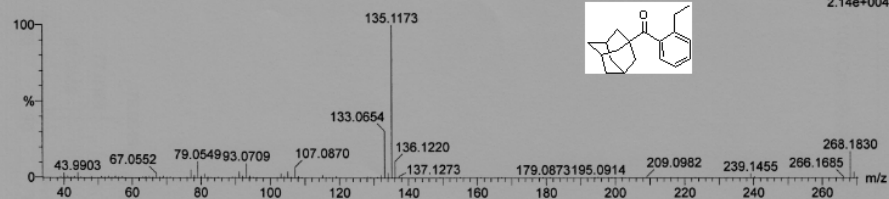

Minimum: 2.50  
Maximum: 100.00

| Mass     | RA     | Calc. Mass | mDa  | PPM   | DBE | i-FIT     | Formula   |
|----------|--------|------------|------|-------|-----|-----------|-----------|
| 39.9631  | 2.85   | ---        | ---  | ---   | --- | ---       | ---       |
| 43.9903  | 3.04   | ---        | ---  | ---   | --- | ---       | ---       |
| 77.0394  | 4.89   | 77.0391    | 0.3  | 3.9   | 4.5 | 1264.8    | C6 H5     |
| 79.0549  | 10.45  | 79.0548    | 0.1  | 1.3   | 3.5 | 245.4     | C6 H7     |
| 91.0553  | 3.77   | 91.0548    | 0.5  | 5.5   | 4.5 | 1092.7    | C7 H7     |
| 93.0709  | 9.29   | 93.0704    | 0.5  | 5.4   | 3.5 | 28.6      | C7 H9     |
| 105.0705 | 3.87   | 105.0704   | 0.1  | 1.0   | 4.5 | 735.6     | C8 H9     |
| 107.0870 | 6.59   | 107.0861   | 0.9  | 8.4   | 3.5 | 13.8      | C8 H11    |
| 133.0654 | 30.57  | 133.0653   | 0.1  | 0.8   | 5.5 | 17471.7   | C9 H9 O   |
| 134.0697 | 3.06   | 134.0732   | -3.5 | -26.1 | 5.0 | 17744.6   | C9 H10 O  |
| 135.1173 | 100.00 | 135.1174   | -0.1 | -0.7  | 3.5 | 5.5       | C10 H15   |
| 136.1220 | 10.67  | 136.1252   | -3.2 | -23.5 | 3.0 | 54.0      | C10 H16   |
| 239.1455 | 2.55   | 239.1436   | 1.9  | 7.9   | 8.5 | 2773053.5 | C17 H19 O |
| 268.1830 | 17.15  | 268.1827   | 0.3  | 1.1   | 8.0 | 1.1       | C19 H24 O |
| 269.1882 | 3.51   | ---        | ---  | ---   | --- | ---       | ---       |

## (2-ethylphenyl)(o-tolyl)methanone 3vj

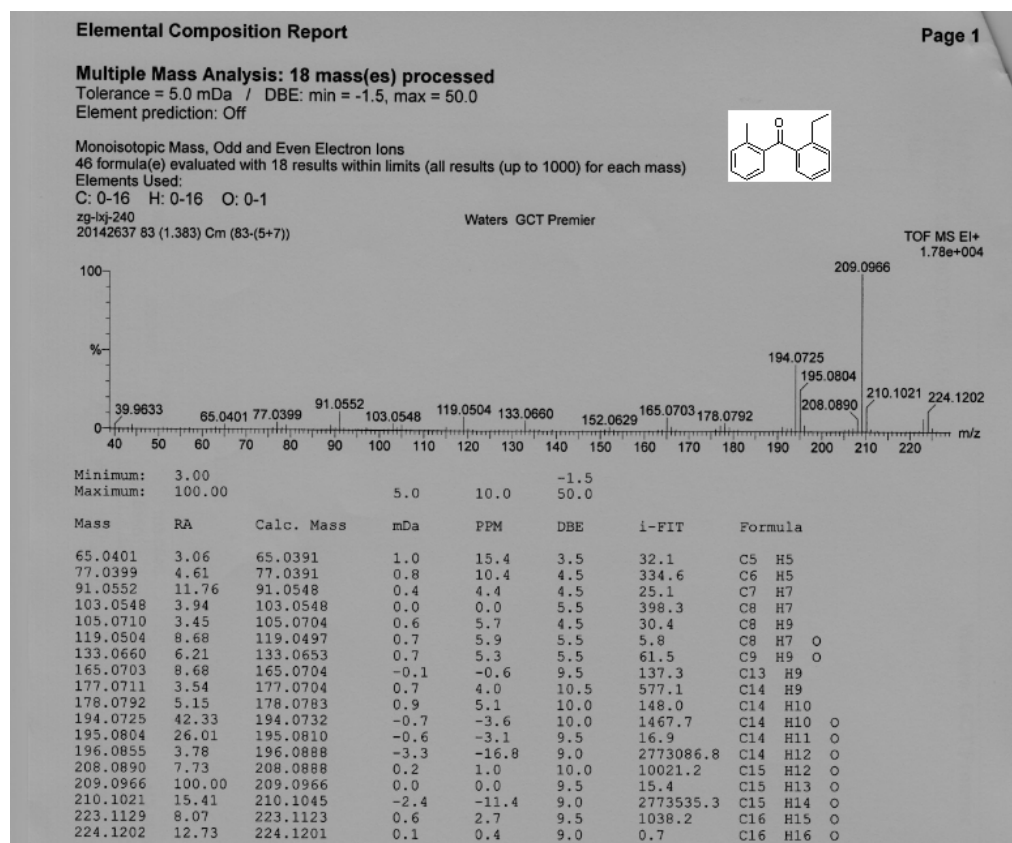

## 4'-methoxy-N-phenyl-N-tosyl-[1,1'-biphenyl]-4-carboxamide 4

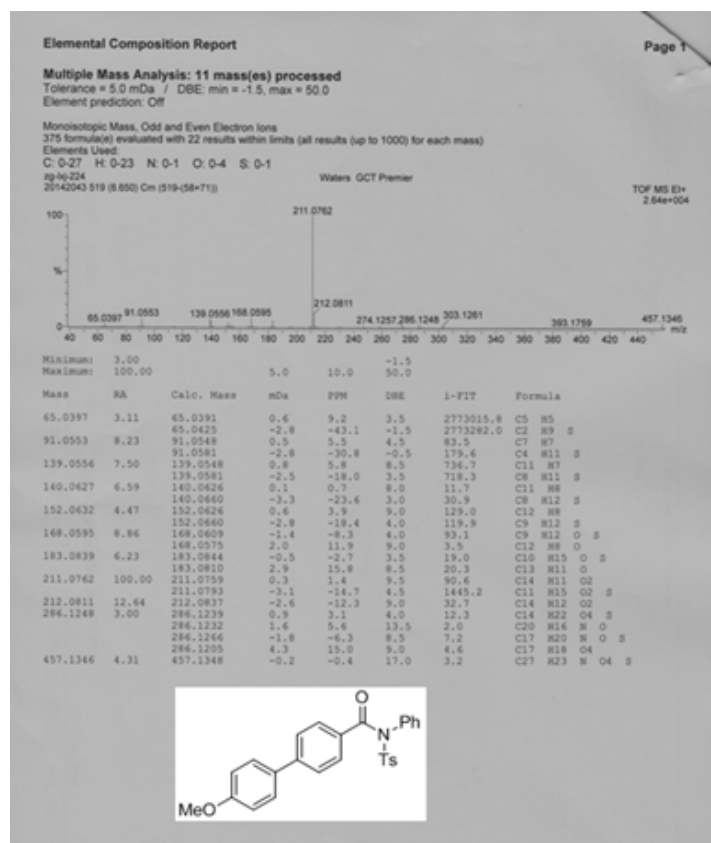

## (4'-methoxy-[1,1'-biphenyl]-4-yl)(p-tolyl)methanone 5

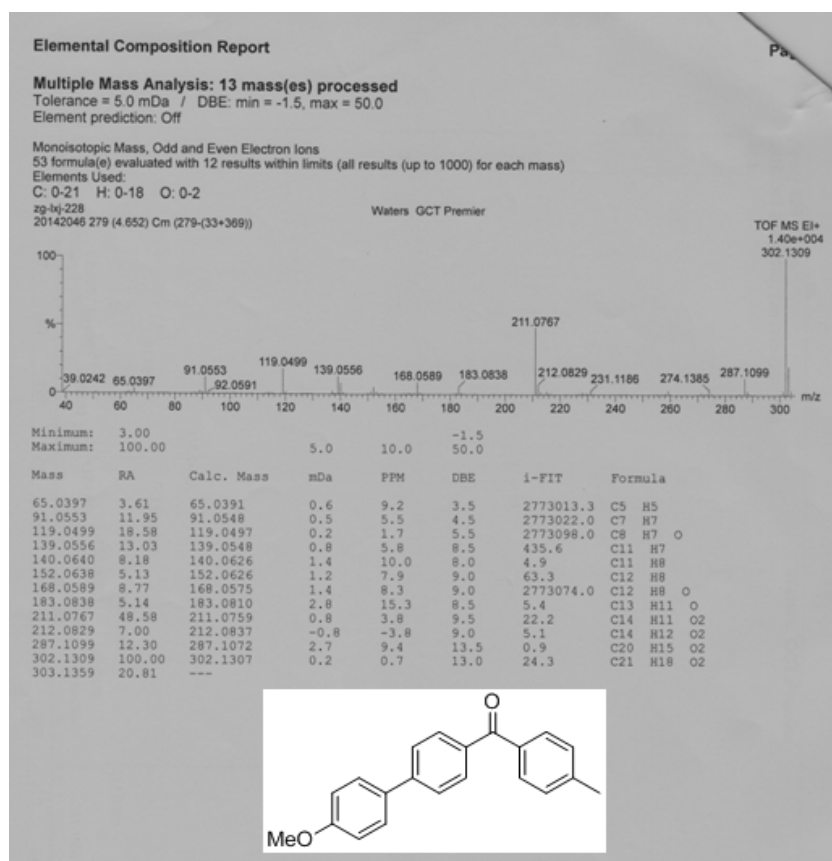

## (4'-methyl-[1,1'-biphenyl]-4-yl)(p-tolyl)methanone 6

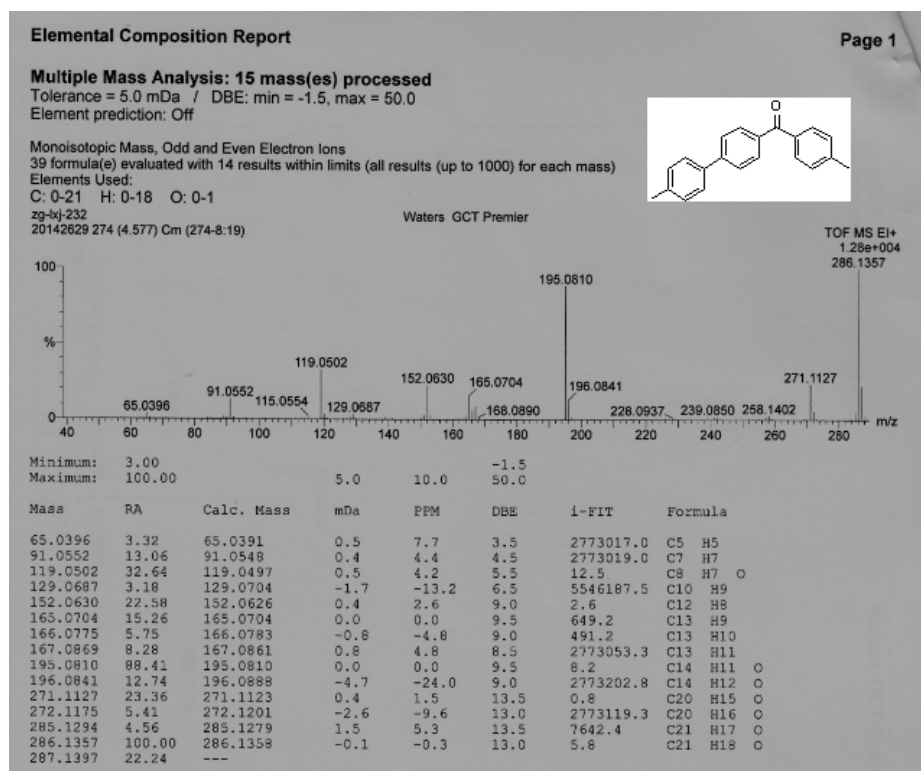

Supplement: c5cc00430f1.pdf [file c5cc00430f1.pdf]
